# Supplementary material
Source: publisher figshare collection journal article supplement (https://gsajournals.figshare.com/ndownloader/files/14690639)
Supplement: Supplementary file 1 [file 14690639]

## Sheet: Sheet1
plot	rep	pop	Line	source	range	column	nlb_score1	nlb_score2	nlb_score3	nlb_audpc	dta
5001	1	H100_DRIL72.061	H100_DRIL72.061 F2-18	Chile16_112-7	3	1	25	35	60	40	59
5002	1	H100_DRIL72.061	H100_DRIL72.061 F2-50	Chile16_115-15	3	2	25	40	60	42.5	61
5003	1	H100_DRIL72.061	H100_DRIL72.061 F2-58	Chile16_116-5	3	3	25	35	60	40	60
5004	1	H100_DRIL72.061	H100_DRIL72.061 F2-51	Chile16_115-16	3	4	30	40	60	43.5714	58
5005	1	H100_DRIL72.061	H100_DRIL72.061 F2-76	Chile16_117-9	3	5	20	30	60	36.4286	62
5006	1	H100_DRIL72.061	H100_DRIL72.061 F2-62	Chile16_116-9	3	6	20	30	55	35	62
5007	1	H100_DRIL72.061	H100_DRIL72.061 F2-53	Chile16_115-18	3	7	20	30	55	35	62
5008	1	H100_DRIL72.061	H100_DRIL72.061 F2-15	Chile16_112-4	3	8	20	30	60	36.4286	61
5009	1	H100_DRIL72.061	H100_DRIL72.061 F2-11	Chile16_114-11	3	9	25	35	70	42.8571	60
5010	1	H100_DRIL72.061	H100_DRIL72.061 F2-28	Chile16_113-5	3	10	20	30	60	36.4286	62
5011	1	H100	H100	CL14 R2139-1	3	11	30	35	70	43.9286	59
5012	1	H100_DRIL72.061	H100_DRIL72.061 F2-2	Chile16_114-2	3	12	25	30	60	37.5	63
5013	1	H100_DRIL72.061	H100_DRIL72.061 F2-71	Chile16_117-4	3	13	20	35	60	38.9286	60
5014	1	H100_DRIL72.061	H100_DRIL72.061 F2-43	Chile16_115-8	3	14	20	30	60	36.4286	62
5015	1	H100_DRIL72.061	H100_DRIL72.061 F2-67	Chile16_116-14	3	15	20	30	60	36.4286	61
5016	1	H100_DRIL72.061	H100_DRIL72.061 F2-52	Chile16_115-17	3	16	20	30	60	36.4286	61
5017	1	H100_DRIL72.061	H100_DRIL72.061 F2-68	Chile16_117-1	3	17	20	25	60	33.9286	62
5018	1	H100_DRIL72.061	H100_DRIL72.061 F2-40	Chile16_115-5	3	18	25	30	60	37.5	61
5019	1	H100_DRIL72.061	H100_DRIL72.061 F2-39	Chile16_115-4	3	19	20	30	65	37.8571	62
5020	1	H100_DRIL72.061	H100_DRIL72.061 F2-9	Chile16_114-9	3	20	20	25	60	33.9286	60
5021	1	H100_DRIL72.061	H100_DRIL72.061 F2-5	Chile16_114-5	3	21	25	30	60	37.5	61
5022	1	H100	H100	CL14 R2139-1	3	22	30	35	85	48.2143	60
5023	1	H100_DRIL72.061	H100_DRIL72.061 F2-59	Chile16_116-6	3	23	20	30	60	36.4286	62
5024	1	H100_DRIL72.061	H100_DRIL72.061 F2-34	Chile16_113-11	3	24	20	25	60	33.9286	60
5025	1	H100_DRIL72.061	H100_DRIL72.061 F2-31	Chile16_113-8	3	25	20	25	60	33.9286	61
5026	1	H100_DRIL72.061	H100_DRIL72.061 F2-21	Chile16_112-10	3	26	20	25	55	32.5	61
5027	1	H100_DRIL72.061	H100_DRIL72.061 F2-32	Chile16_113-9	3	27	20	25	55	32.5	59
5028	1	H100_DRIL72.061	H100_DRIL72.061 F2-75	Chile16_117-8	4	27	15	20	50	27.5	62
5029	1	H100_DRIL72.061	H100_DRIL72.061 F2-10	Chile16_114-10	4	26	20	25	55	32.5	63
5030	1	H100_DRIL72.061	H100_DRIL72.061 F2-20	Chile16_112-9	4	25	20	25	55	32.5	62
5031	1	H100_DRIL72.061	H100_DRIL72.061 F2-37	Chile16_115-2	4	24	25	30	60	37.5	62
5032	1	H100_DRIL72.061	H100_DRIL72.061 F2-79	Chile16_117-12	4	23	20	25	60	33.9286	61
5033	1	H100_DRIL72.061	H100_DRIL72.061 F2-24	Chile16_113-1	4	22	20	25	60	33.9286	61
5034	1	H100_DRIL72.061	H100_DRIL72.061 F2-60	Chile16_116-7	4	21	25	30	60	37.5	61
5035	1	H100_DRIL72.061	H100_DRIL72.061 F2-26	Chile16_113-3	4	20	30	30	60	38.5714	60
5036	1	H100_DRIL72.061	H100_DRIL72.061 F2-8	Chile16_114-8	4	19	25	30	55	36.0714	61
5037	1	H100_DRIL72.061	H100_DRIL72.061 F2-41	Chile16_115-6	4	18	25	30	55	36.0714	58
5038	1	H100_DRIL72.061	H100_DRIL72.061 F2-77	Chile16_117-10	4	17	25	30	55	36.0714	63
5039	1	H100_DRIL72.061	H100_DRIL72.061 F2-38	Chile16_115-3	4	16	25	30	55	36.0714	62
5040	1	H100_DRIL72.061	H100_DRIL72.061 F2-42	Chile16_115-7	4	15	25	30	55	36.0714	61
5041	1	H100_DRIL72.061	H100_DRIL72.061 F2-56	Chile16_116-3	4	14	20	25	55	32.5	61
5042	1	H100_DRIL72.061	H100_DRIL72.061 F2-36	Chile16_115-1	4	13	20	25	55	32.5	64
5043	1	H100_DRIL72.061	H100_DRIL72.061 F2-1	Chile16_114-1	4	12	25	30	65	38.9286	61
5044	1	H100_DRIL72.061	H100_DRIL72.061 F2-63	Chile16_116-10	4	11	25	35	65	41.4286	61
5045	1	H100	H100	CL14 R2139-1	4	10	30	40	80	49.2857	60
5046	1	H100_DRIL72.061	H100_DRIL72.061 F2-23	Chile16_112-12	4	9	25	35	60	40	60
5047	1	H100_DRIL72.061	H100_DRIL72.061 F2-69	Chile16_117-2	4	8	30	35	60	41.0714	60
5048	1	H100_DRIL72.061	H100_DRIL72.061 F2-17	Chile16_112-6	4	7	25	35	60	40	61
5049	1	H100_DRIL72.061	H100_DRIL72.061 F2-72	Chile16_117-5	4	6	20	35	60	38.9286	64
5050	1	H100_DRIL72.061	H100_DRIL72.061 F2-33	Chile16_113-10	4	5	20	35	60	38.9286	63
5051	1	H100_DRIL72.061	H100_DRIL72.061 F2-35	Chile16_113-12	4	4	25	40	60	42.5	61
5052	1	H100_DRIL72.061	H100_DRIL72.061 F2-47	Chile16_115-12	4	3	25	40	60	42.5	60
5053	1	H100_DRIL72.061	H100_DRIL72.061 F2-66	Chile16_116-13	4	2	25	35	60	40	61
5054	1	H100_DRIL72.061	H100_DRIL72.061 F2-49	Chile16_115-14	4	1	20	35	60	38.9286	62
5055	1	H100_DRIL72.061	H100_DRIL72.061 F2-30	Chile16_113-7	5	1	25	35	60	40	62
5056	1	H100_DRIL72.061	H100_DRIL72.061 F2-74	Chile16_117-7	5	2	25	40	60	42.5	61
5057	1	H100_DRIL72.061	H100_DRIL72.061 F2-48	Chile16_115-13	5	3	20	35	55	37.5	62
5058	1	H100_DRIL72.061	H100_DRIL72.061 F2-4	Chile16_114-4	5	4	25	40	55	41.0714	60
5059	1	H100_DRIL72.061	H100_DRIL72.061 F2-14	Chile16_112-3	5	5	25	35	60	40	61
5060	1	H100_DRIL72.061	H100_DRIL72.061 F2-45	Chile16_115-10	5	6	25	40	70	45.3571	61
5061	1	H100_DRIL72.061	H100_DRIL72.061 F2-3	Chile16_114-3	5	7	30	40	70	46.4286	60
5062	1	H100_DRIL72.061	H100_DRIL72.061 F2-29	Chile16_113-6	5	8	25	35	60	40	63
5063	1	H100	H100	CL14 R2139-1	5	9	25	40	70	45.3571	60
5064	1	H100_DRIL72.061	H100_DRIL72.061 F2-57	Chile16_116-4	5	10	25	35	65	41.4286	61
5065	1	H100_DRIL72.061	H100_DRIL72.061 F2-12	Chile16_112-1	5	11	25	35	70	42.8571	61
5066	1	H100_DRIL72.061	H100_DRIL72.061 F2-70	Chile16_117-3	5	12	20	35	60	38.9286	61
5067	1	H100_DRIL72.061	H100_DRIL72.061 F2-19	Chile16_112-8	5	13	20	30	60	36.4286	64
5068	1	H100_DRIL72.061	H100_DRIL72.061 F2-78	Chile16_117-11	5	14	20	35	60	38.9286	62
5069	1	H100_DRIL72.061	H100_DRIL72.061 F2-73	Chile16_117-6	5	15	20	35	60	38.9286	59
5070	1	H100_DRIL72.061	H100_DRIL72.061 F2-61	Chile16_116-8	5	16	25	35	60	40	61
5071	1	H100_DRIL72.061	H100_DRIL72.061 F2-64	Chile16_116-11	5	17	25	35	60	40	61
5072	1	H100_DRIL72.061	H100_DRIL72.061 F2-25	Chile16_113-2	5	18	20	30	60	36.4286	61
5073	1	H100_DRIL72.061	H100_DRIL72.061 F2-44	Chile16_115-9	5	19	20	30	60	36.4286	61
5074	1	H100_DRIL72.061	H100_DRIL72.061 F2-7	Chile16_114-7	5	20	20	30	60	36.4286	59
5075	1	H100_DRIL72.061	H100_DRIL72.061 F2-13	Chile16_112-2	5	21	15	25	50	30	64
5076	1	DRIL72.061	DRIL72.061	CL16 669-1	5	22	15	25	50	30	63
5077	1	H100_DRIL72.061	H100_DRIL72.061 F2-22	Chile16_112-11	5	23	15	30	55	33.9286	61
5078	1	H100_DRIL72.061	H100_DRIL72.061 F2-16	Chile16_112-5	5	24	15	25	55	31.4286	61
5079	1	H100_DRIL72.061	H100_DRIL72.061 F2-46	Chile16_115-11	5	25	15	25	55	31.4286	61
5080	1	H100_DRIL72.061	H100_DRIL72.061 F2-6	Chile16_114-6	5	26	15	25	55	31.4286	61
5081	1			BBP	5	27				0	#NUM!
5082	1	H100_DRIL52.157	H100_DRIL52.157 F2-92	Chile16_68-7	6	27	20	25	55	32.5	58
5083	1	H100_DRIL52.157	H100_DRIL52.157 F2-12	Chile16_65-12	6	26	15	25	55	31.4286	61
5084	1	H100	H100	CL14 R2139-1	6	25	15	30	55	33.9286	62
5085	1	H100_DRIL52.157	H100_DRIL52.157 F2-24	Chile16_67-8	6	24	20	30	60	36.4286	61
5086	1	H100_DRIL52.157	H100_DRIL52.157 F2-16	Chile16_65-16	6	23	20	30	55	35	58
5087	1	H100_DRIL52.157	H100_DRIL52.157 F2-95	Chile16_68-10	6	22	20	30	60	36.4286	61
5088	1	H100_DRIL52.157	H100_DRIL52.157 F2-32	Chile16_70-1	6	21	25	30	55	36.0714	58
5089	1	H100	H100	CL14 R2139-1	6	20	25	40	75	46.7857	58
5090	1	H100_DRIL52.157	H100_DRIL52.157 F2-63	Chile16_66-13	6	19	20	35	70	41.7857	58
5091	1	H100_DRIL52.157	H100_DRIL52.157 F2-15	Chile16_65-15	6	18	20	35	60	38.9286	58
5092	1	H100_DRIL52.157	H100_DRIL52.157 F2-83	Chile16_69-15	6	17	25	35	60	40	60
5093	1	H100_DRIL52.157	H100_DRIL52.157 F2-58	Chile16_66-8	6	16	25	35	60	40	60
5094	1	H100_DRIL52.157	H100_DRIL52.157 F2-27	Chile16_67-11	6	15	25	35	60	40	58
5095	1	H100_DRIL52.157	H100_DRIL52.157 F2-22	Chile16_67-6	6	14	25	35	60	40	62
5096	1	H100_DRIL52.157	H100_DRIL52.157 F2-28	Chile16_67-12	6	13	25	35	60	40	61
5097	1	H100_DRIL52.157	H100_DRIL52.157 F2-59	Chile16_66-9	6	12	25	40	60	42.5	61
5098	1	H100_DRIL52.157	H100_DRIL52.157 F2-62	Chile16_66-12	6	11	25	40	70	45.3571	57
5099	1	H100_DRIL52.157	H100_DRIL52.157 F2-101	Chile16_68-16	6	10	25	40	70	45.3571	59
5100	1	H100_DRIL52.157	H100_DRIL52.157 F2-75	Chile16_69-7	6	9	25	40	70	45.3571	59
5101	1	H100_DRIL52.157	H100_DRIL52.157 F2-33	Chile16_70-2	6	8	25	40	70	45.3571	58
5102	1	H100_DRIL52.157	H100_DRIL52.157 F2-48	Chile16_70-17	6	7	25	40	70	45.3571	57
5103	1	H100_DRIL52.157	H100_DRIL52.157 F2-86	Chile16_68-1	6	6	20	35	70	41.7857	57
5104	1	H100_DRIL52.157	H100_DRIL52.157 F2-60	Chile16_66-10	6	5	30	40	70	46.4286	59
5105	1	H100_DRIL52.157	H100_DRIL52.157 F2-99	Chile16_68-14	6	4	25	35	70	42.8571	59
5106	1	H100_DRIL52.157	H100_DRIL52.157 F2-93	Chile16_68-8	6	3	25	35	70	42.8571	59
5107	1	H100_DRIL52.157	H100_DRIL52.157 F2-44	Chile16_70-13	6	2	25	35	70	42.8571	59
5108	1	H100_DRIL52.157	H100_DRIL52.157 F2-20	Chile16_67-4	6	1	25	35	70	42.8571	59
5109	1	H100_DRIL52.157	H100_DRIL52.157 F2-73	Chile16_69-5	7	1	25	40	70	45.3571	59
5110	1	H100_DRIL52.157	H100_DRIL52.157 F2-85	Chile16_69-17	7	2	25	40	70	45.3571	58
5111	1	H100_DRIL52.157	H100_DRIL52.157 F2-100	Chile16_68-15	7	3	25	40	70	45.3571	59
5112	1	H100_DRIL52.157	H100_DRIL52.157 F2-11	Chile16_65-11	7	4	25	35	65	41.4286	59
5113	1	H100_DRIL52.157	H100_DRIL52.157 F2-98	Chile16_68-13	7	5	25	40	65	43.9286	59
5114	1	H100_DRIL52.157	H100_DRIL52.157 F2-30	Chile16_67-14	7	6	25	40	65	43.9286	59
5115	1	H100_DRIL52.157	H100_DRIL52.157 F2-64	Chile16_66-14	7	7	25	40	70	45.3571	60
5116	1	DRIL52.157	DRIL52.157	CL16 1414-2	7	8	25	35	60	40	59
5117	1	H100_DRIL52.157	H100_DRIL52.157 F2-91	Chile16_68-6	7	9	20	40	65	42.8571	60
5118	1	H100_DRIL52.157	H100_DRIL52.157 F2-97	Chile16_68-12	7	10	25	40	65	43.9286	62
5119	1	H100	H100	CL14 R2139-1	7	11	25	40	80	48.2143	61
5120	1	H100_DRIL52.157	H100_DRIL52.157 F2-84	Chile16_69-16	7	12	20	35	70	41.7857	62
5121	1	H100_DRIL52.157	H100_DRIL52.157 F2-54	Chile16_66-4	7	13	20	35	65	40.3571	62
5122	1	H100_DRIL52.157	H100_DRIL52.157 F2-37	Chile16_70-6	7	14	20	35	65	40.3571	59
5123	1	H100_DRIL52.157	H100_DRIL52.157 F2-79	Chile16_69-11	7	15	20	30	60	36.4286	58
5124	1	H100_DRIL52.157	H100_DRIL52.157 F2-34	Chile16_70-3	7	16	20	35	65	40.3571	60
5125	1	H100_DRIL52.157	H100_DRIL52.157 F2-51	Chile16_66-1	7	17	25	30	65	38.9286	62
5126	1	H100_DRIL52.157	H100_DRIL52.157 F2-52	Chile16_66-2	7	18	25	30	65	38.9286	59
5127	1	H100_DRIL52.157	H100_DRIL52.157 F2-72	Chile16_69-4	7	19	30	35	65	42.5	57
5128	1	H100_DRIL52.157	H100_DRIL52.157 F2-89	Chile16_68-4	7	20	25	35	65	41.4286	57
5129	1	H100_DRIL52.157	H100_DRIL52.157 F2-21	Chile16_67-5	7	21	25	30	65	38.9286	57
5130	1	H100_DRIL52.157	H100_DRIL52.157 F2-26	Chile16_67-10	7	22	20	35	60	38.9286	62
5131	1	H100_DRIL52.157	H100_DRIL52.157 F2-2	Chile16_65-2	7	23	20	30	60	36.4286	59
5132	1	H100_DRIL52.157	H100_DRIL52.157 F2-10	Chile16_65-10	7	24	15	30	60	35.3571	61
5133	1	H100_DRIL52.157	H100_DRIL52.157 F2-23	Chile16_67-7	7	25	15	30	60	35.3571	60
5134	1	H100_DRIL52.157	H100_DRIL52.157 F2-67	Chile16_66-17	7	26	15	30	60	35.3571	60
5135	1	H100_DRIL52.157	H100_DRIL52.157 F2-68	Chile16_66-18	7	27	15	25	55	31.4286	58
5136	1	H100	H100	CL14 R2139-1	8	27	15	30	60	35.3571	59
5137	1	H100_DRIL52.157	H100_DRIL52.157 F2-13	Chile16_65-13	8	26	15	25	50	30	62
5138	1	H100_DRIL52.157	H100_DRIL52.157 F2-80	Chile16_69-12	8	25	15	30	55	33.9286	60
5139	1	H100_DRIL52.157	H100_DRIL52.157 F2-88	Chile16_68-3	8	24	15	30	55	33.9286	60
5140	1	H100_DRIL52.157	H100_DRIL52.157 F2-43	Chile16_70-12	8	23	15	30	60	35.3571	61
5141	1	H100_DRIL52.157	H100_DRIL52.157 F2-61	Chile16_66-11	8	22	20	30	60	36.4286	58
5142	1	H100_DRIL52.157	H100_DRIL52.157 F2-29	Chile16_67-13	8	21	20	35	60	38.9286	58
5143	1	H100_DRIL52.157	H100_DRIL52.157 F2-50	Chile16_70-19	8	20	20	35	60	38.9286	61
5144	1	H100_DRIL52.157	H100_DRIL52.157 F2-5	Chile16_65-5	8	19	25	35	60	40	57
5145	1	H100_DRIL52.157	H100_DRIL52.157 F2-42	Chile16_70-11	8	18	20	35	65	40.3571	59
5146	1	H100_DRIL52.157	H100_DRIL52.157 F2-35	Chile16_70-4	8	17	20	35	65	40.3571	59
5147	1	H100_DRIL52.157	H100_DRIL52.157 F2-47	Chile16_70-16	8	16	20	35	65	40.3571	57
5148	1	H100_DRIL52.157	H100_DRIL52.157 F2-46	Chile16_70-15	8	15	25	40	70	45.3571	58
5149	1	H100_DRIL52.157	H100_DRIL52.157 F2-87	Chile16_68-2	8	14	20	35	65	40.3571	62
5150	1	H100_DRIL52.157	H100_DRIL52.157 F2-49	Chile16_70-18	8	13	20	35	65	40.3571	62
5151	1	H100_DRIL52.157	H100_DRIL52.157 F2-4	Chile16_65-4	8	12	20	35	65	40.3571	60
5152	1	H100_DRIL52.157	H100_DRIL52.157 F2-41	Chile16_70-10	8	11	20	35	65	40.3571	60
5153	1	H100_DRIL52.157	H100_DRIL52.157 F2-31	Chile16_67-15	8	10	25	35	65	41.4286	60
5154	1	H100_DRIL52.157	H100_DRIL52.157 F2-77	Chile16_69-9	8	9	25	35	65	41.4286	60
5155	1	H100_DRIL52.157	H100_DRIL52.157 F2-90	Chile16_68-5	8	8	25	35	65	41.4286	57
5156	1	H100_DRIL52.157	H100_DRIL52.157 F2-6	Chile16_65-6	8	7	25	35	70	42.8571	60
5157	1	H100	H100	CL14 R2139-1	8	6	25	40	80	48.2143	60
5158	1	H100_DRIL52.157	H100_DRIL52.157 F2-17	Chile16_67-1	8	5	20	35	70	41.7857	61
5159	1	H100_DRIL52.157	H100_DRIL52.157 F2-25	Chile16_67-9	8	4	25	35	70	42.8571	59
5160	1	H100_DRIL52.157	H100_DRIL52.157 F2-74	Chile16_69-6	8	3	30	40	70	46.4286	57
5161	1	H100_DRIL52.157	H100_DRIL52.157 F2-8	Chile16_65-8	8	2	25	40	70	45.3571	58
5162	1	H100_DRIL52.157	H100_DRIL52.157 F2-9	Chile16_65-9	8	1	25	40	70	45.3571	59
5163	1	H100_DRIL52.157	H100_DRIL52.157 F2-57	Chile16_66-7	9	1	25	35	65	41.4286	58
5164	1	H100_DRIL52.157	H100_DRIL52.157 F2-71	Chile16_69-3	9	2	20	40	70	44.2857	60
5165	1	H100_DRIL52.157	H100_DRIL52.157 F2-69	Chile16_69-1	9	3	25	40	65	43.9286	58
5166	1	H100_DRIL52.157	H100_DRIL52.157 F2-45	Chile16_70-14	9	4	25	40	70	45.3571	59
5167	1	H100_DRIL52.157	H100_DRIL52.157 F2-82	Chile16_69-14	9	5	20	40	70	44.2857	62
5168	1	H100	H100	CL14 R2139-1	9	6	25	45	80	50.7143	59
5169	1	H100_DRIL52.157	H100_DRIL52.157 F2-76	Chile16_69-8	9	7	20	40	65	42.8571	58
5170	1	H100_DRIL52.157	H100_DRIL52.157 F2-70	Chile16_69-2	9	8	25	40	70	45.3571	59
5171	1	H100_DRIL52.157	H100_DRIL52.157 F2-14	Chile16_65-14	9	9	25	40	70	45.3571	62
5172	1	H100_DRIL52.157	H100_DRIL52.157 F2-78	Chile16_69-10	9	10	25	40	75	46.7857	60
5173	1	H100_DRIL52.157	H100_DRIL52.157 F2-94	Chile16_68-9	9	11	20	35	70	41.7857	60
5174	1	H100_DRIL52.157	H100_DRIL52.157 F2-81	Chile16_69-13	9	12	20	35	70	41.7857	60
5175	1	H100_DRIL52.157	H100_DRIL52.157 F2-56	Chile16_66-6	9	13	20	35	55	37.5	62
5176	1	H100_DRIL52.157	H100_DRIL52.157 F2-96	Chile16_68-11	9	14	20	35	65	40.3571	60
5177	1	H100_DRIL52.157	H100_DRIL52.157 F2-39	Chile16_70-8	9	15	25	35	65	41.4286	60
5178	1	H100_DRIL52.157	H100_DRIL52.157 F2-7	Chile16_65-7	9	16	20	30	65	37.8571	59
5179	1	H100_DRIL52.157	H100_DRIL52.157 F2-66	Chile16_66-16	9	17	20	30	65	37.8571	60
5180	1	H100_DRIL52.157	H100_DRIL52.157 F2-19	Chile16_67-3	9	18	20	30	65	37.8571	60
5181	1	H100_DRIL52.157	H100_DRIL52.157 F2-18	Chile16_67-2	9	19	20	30	65	37.8571	60
5182	1	H100_DRIL52.157	H100_DRIL52.157 F2-36	Chile16_70-5	9	20	25	35	65	41.4286	59
5183	1	H100_DRIL52.157	H100_DRIL52.157 F2-1	Chile16_65-1	9	21	20	30	65	37.8571	60
5184	1	H100_DRIL52.157	H100_DRIL52.157 F2-3	Chile16_65-3	9	22	25	30	65	38.9286	59
5185	1	H100_DRIL52.157	H100_DRIL52.157 F2-55	Chile16_66-5	9	23	25	30	70	40.3571	58
5186	1	H100_DRIL52.157	H100_DRIL52.157 F2-38	Chile16_70-7	9	24	15	25	60	32.8571	59
5187	1			BBP	9	25				0	#NUM!
5188	1	H100_DRIL72.232	H100_DRIL72.232 F2-31	Chile16_120-5	9	26	20	25	65	35.3571	61
5189	1	H100_DRIL72.232	H100_DRIL72.232 F2-27	Chile16_120-1	9	27	15	25	60	32.8571	60
5190	1	H100_DRIL72.232	H100_DRIL72.232 F2-52	Chile16_122-4	10	27	15	25	60	32.8571	61
5191	1	H100_DRIL72.232	H100_DRIL72.232 F2-15	Chile16_118-6	10	26	15	25	65	34.2857	61
5192	1	H100	H100	CL14 R2139-1	10	25	20	35	65	40.3571	61
5193	1	H100_DRIL72.232	H100_DRIL72.232 F2-3	Chile16_123-3	10	24	15	25	65	34.2857	65
5194	1	H100_DRIL72.232	H100_DRIL72.232 F2-59	Chile16_122-11	10	23	20	30	65	37.8571	61
5195	1	DRIL72.232	DRIL72.232	CL17 287-1	10	22	20	30	60	36.4286	61
5196	1	H100_DRIL72.232	H100_DRIL72.232 F2-7	Chile16_123-7	10	21	25	30	65	38.9286	60
5197	1	H100_DRIL72.232	H100_DRIL72.232 F2-17	Chile16_118-8	10	20	25	35	70	42.8571	60
5198	1	H100_DRIL72.232	H100_DRIL72.232 F2-4	Chile16_123-4	10	19	25	30	70	40.3571	60
5199	1	H100_DRIL72.232	H100_DRIL72.232 F2-38	Chile16_121-1	10	18	25	35	70	42.8571	60
5200	1	H100_DRIL72.232	H100_DRIL72.232 F2-11	Chile16_118-2	10	17	20	35	70	41.7857	61
5201	1	H100_DRIL72.232	H100_DRIL72.232 F2-26	Chile16_119-7	10	16	25	35	70	42.8571	59
5202	1	H100_DRIL72.232	H100_DRIL72.232 F2-35	Chile16_120-9	10	15	25	35	55	38.5714	60
5203	1	H100_DRIL72.232	H100_DRIL72.232 F2-57	Chile16_122-9	10	14	20	35	70	41.7857	61
5204	1	H100_DRIL72.232	H100_DRIL72.232 F2-41	Chile16_121-4	10	13	20	35	70	41.7857	61
5205	1	H100_DRIL72.232	H100_DRIL72.232 F2-32	Chile16_120-6	10	12	20	35	70	41.7857	61
5206	1	H100_DRIL72.232	H100_DRIL72.232 F2-39	Chile16_121-2	10	11	20	35	70	41.7857	61
5207	1	H100_DRIL72.232	H100_DRIL72.232 F2-18	Chile16_118-9	10	10	25	35	70	42.8571	61
5208	1	H100_DRIL72.232	H100_DRIL72.232 F2-19	Chile16_118-10	10	9	20	35	70	41.7857	61
5209	1	H100_DRIL72.232	H100_DRIL72.232 F2-12	Chile16_118-3	10	8	25	40	70	45.3571	59
5210	1	H100_DRIL72.232	H100_DRIL72.232 F2-8	Chile16_123-8	10	7	20	35	70	41.7857	61
5211	1	H100_DRIL72.232	H100_DRIL72.232 F2-46	Chile16_121-9	10	6	25	40	70	45.3571	61
5212	1	H100_DRIL72.232	H100_DRIL72.232 F2-2	Chile16_123-2	10	5	25	40	70	45.3571	60
5213	1	H100_DRIL72.232	H100_DRIL72.232 F2-49	Chile16_122-1	10	4	20	40	70	44.2857	60
5214	1	H100_DRIL72.232	H100_DRIL72.232 F2-50	Chile16_122-2	10	3	25	40	70	45.3571	60
5215	1	H100_DRIL72.232	H100_DRIL72.232 F2-13	Chile16_118-4	10	2	20	30	55	35	61
5216	1	H100	H100	CL14 R2139-1	10	1	25	40	70	45.3571	60
5217	1	H100_DRIL72.232	H100_DRIL72.232 F2-53	Chile16_122-5	11	1	25	35	65	41.4286	60
5218	1	H100_DRIL72.232	H100_DRIL72.232 F2-36	Chile16_120-10	11	2	25	35	65	41.4286	60
5219	1	H100_DRIL72.232	H100_DRIL72.232 F2-23	Chile16_119-4	11	3	20	35	65	40.3571	62
5220	1	H100_DRIL72.232	H100_DRIL72.232 F2-16	Chile16_118-7	11	4	20	40	65	42.8571	60
5221	1	H100_DRIL72.232	H100_DRIL72.232 F2-47	Chile16_121-10	11	5	25	40	70	45.3571	59
5222	1	H100_DRIL72.232	H100_DRIL72.232 F2-45	Chile16_121-8	11	6	25	40	75	46.7857	60
5223	1	H100_DRIL72.232	H100_DRIL72.232 F2-37	Chile16_120-11	11	7	25	40	70	45.3571	59
5224	1	H100_DRIL72.232	H100_DRIL72.232 F2-9	Chile16_123-9	11	8	25	40	70	45.3571	61
5225	1	H100_DRIL72.232	H100_DRIL72.232 F2-56	Chile16_122-8	11	9	25	40	70	45.3571	60
5226	1	H100_DRIL72.232	H100_DRIL72.232 F2-34	Chile16_120-8	11	10	25	40	65	43.9286	60
5227	1	H100_DRIL72.232	H100_DRIL72.232 F2-14	Chile16_118-5	11	11	20	35	70	41.7857	61
5228	1	H100	H100	CL14 R2139-1	11	12	25	35	55	38.5714	61
5229	1	H100_DRIL72.232	H100_DRIL72.232 F2-5	Chile16_123-5	11	13	20	35	70	41.7857	61
5230	1	H100_DRIL72.232	H100_DRIL72.232 F2-42	Chile16_121-5	11	14	20	35	65	40.3571	61
5231	1	H100_DRIL72.232	H100_DRIL72.232 F2-43	Chile16_121-6	11	15	20	35	65	40.3571	59
5232	1	H100_DRIL72.232	H100_DRIL72.232 F2-20	Chile16_119-1	11	16	20	35	70	41.7857	60
5233	1	H100_DRIL72.232	H100_DRIL72.232 F2-48	Chile16_121-11	11	17	20	30	65	37.8571	61
5234	1	H100_DRIL72.232	H100_DRIL72.232 F2-30	Chile16_120-4	11	18	20	30	65	37.8571	61
5235	1	H100_DRIL72.232	H100_DRIL72.232 F2-21	Chile16_119-2	11	19	20	30	60	36.4286	61
5236	1	H100_DRIL72.232	H100_DRIL72.232 F2-62	Chile16_122-14	11	20	15	30	65	36.7857	61
5237	1	H100_DRIL72.232	H100_DRIL72.232 F2-1	Chile16_123-1	11	21	25	35	65	41.4286	59
5238	1	H100_DRIL72.232	H100_DRIL72.232 F2-28	Chile16_120-2	11	22	25	35	65	41.4286	60
5239	1	H100_DRIL72.232	H100_DRIL72.232 F2-29	Chile16_120-3	11	23	20	30	65	37.8571	62
5240	1	H100_DRIL72.232	H100_DRIL72.232 F2-10	Chile16_118-1	11	24	20	30	65	37.8571	61
5241	1	H100_DRIL72.232	H100_DRIL72.232 F2-55	Chile16_122-7	11	25	25	30	65	38.9286	62
5242	1	H100_DRIL72.232	H100_DRIL72.232 F2-61	Chile16_122-13	11	26	20	25	65	35.3571	59
5243	1	H100_DRIL72.232	H100_DRIL72.232 F2-24	Chile16_119-5	11	27	20	25	65	35.3571	61
5244	1	H100_DRIL72.232	H100_DRIL72.232 F2-44	Chile16_121-7	12	27	20	25	65	35.3571	61
5245	1	H100_DRIL72.232	H100_DRIL72.232 F2-6	Chile16_123-6	12	26	15	25	65	34.2857	61
5246	1	H100_DRIL72.232	H100_DRIL72.232 F2-40	Chile16_121-3	12	25	20	30	65	37.8571	61
5247	1	H100_DRIL72.232	H100_DRIL72.232 F2-51	Chile16_122-3	12	24	20	25	65	35.3571	62
5248	1			BBP	12	23				0	#NUM!
5249	1	H100_DRIL32.134	H100_DRIL32.134 F2-35	Chile16_40-6	12	22	20	30	65	37.8571	60
5250	1	H100_DRIL32.134	H100_DRIL32.134 F2-56	Chile16_37-9	12	21	20	30	65	37.8571	62
5251	1	H100_DRIL32.134	H100_DRIL32.134 F2-34	Chile16_40-5	12	20	20	30	65	37.8571	59
5252	1	H100_DRIL32.134	H100_DRIL32.134 F2-55	Chile16_37-8	12	19	15	25	65	34.2857	59
5253	1	H100_DRIL32.134	H100_DRIL32.134 F2-60	Chile16_37-13	12	18	15	25	60	32.8571	58
5254	1	H100_DRIL32.134	H100_DRIL32.134 F2-38	Chile16_38-1	12	17	20	30	65	37.8571	61
5255	1	H100_DRIL32.134	H100_DRIL32.134 F2-27	Chile16_39-6	12	16	25	35	70	42.8571	59
5256	1	H100_DRIL32.134	H100_DRIL32.134 F2-37	Chile16_40-8	12	15	20	30	65	37.8571	62
5257	1	H100	H100	CL14 R2139-2	12	14	25	40	70	45.3571	59
5258	1	H100_DRIL32.134	H100_DRIL32.134 F2-14	Chile16_35-14	12	13	25	35	70	42.8571	61
5259	1	H100_DRIL32.134	H100_DRIL32.134 F2-40	Chile16_38-3	12	12	20	35	65	40.3571	62
5260	1	H100_DRIL32.134	H100_DRIL32.134 F2-36	Chile16_40-7	12	11	20	30	65	37.8571	61
5261	1	H100_DRIL32.134	H100_DRIL32.134 F2-10	Chile16_35-10	12	10	20	35	65	40.3571	64
5262	1	H100_DRIL32.134	H100_DRIL32.134 F2-25	Chile16_39-4	12	9	20	35	65	40.3571	62
5263	1	H100_DRIL32.134	H100_DRIL32.134 F2-15	Chile16_35-15	12	8	25	30	65	38.9286	62
5264	1	H100_DRIL32.134	H100_DRIL32.134 F2-26	Chile16_39-5	12	7	20	30	65	37.8571	61
5265	1	H100	H100	CL14 R2139-2	12	6	25	40	70	45.3571	59
5266	1	H100_DRIL32.134	H100_DRIL32.134 F2-5	Chile16_35-5	12	5	25	35	65	41.4286	59
5267	1	H100_DRIL32.134	H100_DRIL32.134 F2-54	Chile16_37-7	12	4	20	30	65	37.8571	61
5268	1	H100_DRIL32.134	H100_DRIL32.134 F2-13	Chile16_35-13	12	3	25	35	65	41.4286	60
5269	1	H100_DRIL32.134	H100_DRIL32.134 F2-18	Chile16_36-3	12	2	20	25	60	33.9286	62
5270	1	H100_DRIL32.134	H100_DRIL32.134 F2-8	Chile16_35-8	12	1	25	35	70	42.8571	60
5271	1	H100_DRIL32.134	H100_DRIL32.134 F2-22	Chile16_39-1	13	1	15	30	65	36.7857	62
5272	1	H100_DRIL32.134	H100_DRIL32.134 F2-42	Chile16_38-5	13	2	20	30	65	37.8571	61
5273	1	H100_DRIL32.134	H100_DRIL32.134 F2-52	Chile16_37-5	13	3	20	30	65	37.8571	61
5274	1	H100_DRIL32.134	H100_DRIL32.134 F2-7	Chile16_35-7	13	4	20	30	65	37.8571	61
5275	1	H100_DRIL32.134	H100_DRIL32.134 F2-47	Chile16_38-10	13	5	20	35	70	41.7857	61
5276	1	H100_DRIL32.134	H100_DRIL32.134 F2-4	Chile16_35-4	13	6	20	30	65	37.8571	60
5277	1	H100_DRIL32.134	H100_DRIL32.134 F2-32	Chile16_40-3	13	7	20	30	65	37.8571	61
5278	1	H100_DRIL32.134	H100_DRIL32.134 F2-24	Chile16_39-3	13	8	20	30	65	37.8571	62
5279	1	H100_DRIL32.134	H100_DRIL32.134 F2-31	Chile16_40-2	13	9	20	30	50	33.5714	61
5280	1	H100	H100	CL14 R2139-2	13	10	25	40	75	46.7857	59
5281	1	H100_DRIL32.134	H100_DRIL32.134 F2-49	Chile16_37-2	13	11	20	30	65	37.8571	60
5282	1	H100_DRIL32.134	H100_DRIL32.134 F2-19	Chile16_36-4	13	12	20	30	60	36.4286	64
5283	1	H100_DRIL32.134	H100_DRIL32.134 F2-63	Chile16_37-16	13	13	15	25	55	31.4286	59
5284	1	H100_DRIL32.134	H100_DRIL32.134 F2-58	Chile16_37-11	13	14	20	35	65	40.3571	60
5285	1	H100_DRIL32.134	H100_DRIL32.134 F2-9	Chile16_35-9	13	15	20	30	60	36.4286	59
5286	1	H100_DRIL32.134	H100_DRIL32.134 F2-53	Chile16_37-6	13	16	20	30	65	37.8571	58
5287	1	H100_DRIL32.134	H100_DRIL32.134 F2-50	Chile16_37-3	13	17	20	30	65	37.8571	62
5288	1	DRIL32.134	DRIL32.134	CL16 1394-1	13	18	10	20	60	29.2857	60
5289	1	H100_DRIL32.134	H100_DRIL32.134 F2-45	Chile16_38-8	13	19	15	30	65	36.7857	62
5290	1	H100_DRIL32.134	H100_DRIL32.134 F2-3	Chile16_35-3	13	20	15	30	65	36.7857	60
5291	1	H100	H100	CL14 R2139-2	13	21	20	35	65	40.3571	59
5292	1	H100_DRIL32.134	H100_DRIL32.134 F2-33	Chile16_40-4	13	22	15	30	65	36.7857	60
5293	1	H100_DRIL32.134	H100_DRIL32.134 F2-2	Chile16_35-2	13	23	10	25	65	33.2143	61
5294	1	H100_DRIL32.134	H100_DRIL32.134 F2-12	Chile16_35-12	13	24	20	30	65	37.8571	61
5295	1	H100_DRIL32.134	H100_DRIL32.134 F2-28	Chile16_39-7	13	25	35	30	65	41.0714	61
5296	1	H100_DRIL32.134	H100_DRIL32.134 F2-46	Chile16_38-9	13	26	15	25	65	34.2857	61
5297	1	H100_DRIL32.134	H100_DRIL32.134 F2-59	Chile16_37-12	13	27	15	25	60	32.8571	59
5298	1	H100_DRIL32.134	H100_DRIL32.134 F2-17	Chile16_36-2	14	27	15	25	60	32.8571	61
5299	1	H100_DRIL32.134	H100_DRIL32.134 F2-16	Chile16_36-1	14	26	15	25	60	32.8571	61
5300	1	H100_DRIL32.134	H100_DRIL32.134 F2-48	Chile16_37-1	14	25	10	25	60	31.7857	60
5301	1	H100_DRIL32.134	H100_DRIL32.134 F2-62	Chile16_37-15	14	24	15	25	60	32.8571	61
5302	1	H100_DRIL32.134	H100_DRIL32.134 F2-1	Chile16_35-1	14	23	15	25	65	34.2857	59
5303	1	H100_DRIL32.134	H100_DRIL32.134 F2-11	Chile16_35-11	14	22	15	25	60	32.8571	64
5304	1	H100_DRIL32.134	H100_DRIL32.134 F2-43	Chile16_38-6	14	21	15	25	60	32.8571	61
5305	1	H100_DRIL32.134	H100_DRIL32.134 F2-30	Chile16_40-1	14	20	15	25	60	32.8571	58
5306	1	H100_DRIL32.134	H100_DRIL32.134 F2-61	Chile16_37-14	14	19	15	25	60	32.8571	60
5307	1	H100_DRIL32.134	H100_DRIL32.134 F2-23	Chile16_39-2	14	18	15	30	65	36.7857	60
5308	1	H100_DRIL32.134	H100_DRIL32.134 F2-21	Chile16_36-6	14	17	20	30	65	37.8571	61
5309	1	H100_DRIL32.134	H100_DRIL32.134 F2-39	Chile16_38-2	14	16	20	30	65	37.8571	58
5310	1	H100_DRIL32.134	H100_DRIL32.134 F2-44	Chile16_38-7	14	15	20	25	65	35.3571	61
5311	1	H100_DRIL32.134	H100_DRIL32.134 F2-51	Chile16_37-4	14	14	15	30	65	36.7857	61
5312	1	H100_DRIL32.134	H100_DRIL32.134 F2-41	Chile16_38-4	14	13	15	25	65	34.2857	60
5313	1	H100_DRIL32.134	H100_DRIL32.134 F2-29	Chile16_39-8	14	12	20	30	60	36.4286	60
5314	1	H100_DRIL32.134	H100_DRIL32.134 F2-6	Chile16_35-6	14	11	20	30	65	37.8571	60
5315	1			BBP	14	10				0	#NUM!
5316	1	H100_DRIL32.191	H100_DRIL32.191 F2-3	Chile16_48-3	14	9	20	35	70	41.7857	60
5317	1	H100_DRIL32.191	H100_DRIL32.191 F2-73	Chile16_47-16	14	8	25	35	70	42.8571	60
5318	1	H100_DRIL32.191	H100_DRIL32.191 F2-57	Chile16_50-13	14	7	25	30	70	40.3571	60
5319	1	H100_DRIL32.191	H100_DRIL32.191 F2-18	Chile16_51-6	14	6	20	30	70	39.2857	60
5320	1	H100_DRIL32.191	H100_DRIL32.191 F2-22	Chile16_51-10	14	5	20	30	75	40.7143	60
5321	1	H100	H100	CL14 R2139-2	14	4	25	40	80	48.2143	60
5322	1	H100_DRIL32.191	H100_DRIL32.191 F2-83	Chile16_52-9	14	3	20	30	70	39.2857	62
5323	1	H100_DRIL32.191	H100_DRIL32.191 F2-67	Chile16_47-10	14	2	20	30	70	39.2857	62
5324	1	H100	H100	CL14 R2139-2	14	1	25	40	70	45.3571	60
5325	1	H100_DRIL32.191	H100_DRIL32.191 F2-16	Chile16_51-4	15	1	20	35	65	40.3571	58
5326	1	H100_DRIL32.191	H100_DRIL32.191 F2-29	Chile16_49-2	15	2	20	30	70	39.2857	60
5327	1	H100_DRIL32.191	H100_DRIL32.191 F2-81	Chile16_52-7	15	3	20	30	70	39.2857	60
5328	1	H100_DRIL32.191	H100_DRIL32.191 F2-9	Chile16_48-9	15	4	25	35	75	44.2857	61
5329	1	H100_DRIL32.191	H100_DRIL32.191 F2-74	Chile16_47-17	15	5	20	30	65	37.8571	60
5330	1	H100_DRIL32.191	H100_DRIL32.191 F2-12	Chile16_48-12	15	6	20	30	65	37.8571	62
5331	1	H100_DRIL32.191	H100_DRIL32.191 F2-44	Chile16_49-17	15	7	20	30	65	37.8571	62
5332	1	H100_DRIL32.191	H100_DRIL32.191 F2-48	Chile16_50-4	15	8	20	35	70	41.7857	60
5333	1	H100_DRIL32.191	H100_DRIL32.191 F2-64	Chile16_47-7	15	9	25	35	70	42.8571	61
5334	1	H100_DRIL32.191	H100_DRIL32.191 F2-15	Chile16_51-3	15	10	20	35	70	41.7857	61
5335	1	H100_DRIL32.191	H100_DRIL32.191 F2-63	Chile16_47-6	15	11	20	30	70	39.2857	62
5336	1	H100	H100	CL14 R2139-2	15	12	25	35	70	42.8571	61
5337	1	H100_DRIL32.191	H100_DRIL32.191 F2-7	Chile16_48-7	15	13	20	30	70	39.2857	60
5338	1	H100_DRIL32.191	H100_DRIL32.191 F2-37	Chile16_49-10	15	14	20	30	70	39.2857	60
5339	1	H100_DRIL32.191	H100_DRIL32.191 F2-49	Chile16_50-5	15	15	20	30	70	39.2857	62
5340	1	H100_DRIL32.191	H100_DRIL32.191 F2-46	Chile16_50-2	15	16	25	30	70	40.3571	60
5341	1	H100_DRIL32.191	H100_DRIL32.191 F2-45	Chile16_50-1	15	17	20	30	70	39.2857	62
5342	1	H100_DRIL32.191	H100_DRIL32.191 F2-72	Chile16_47-15	15	18	20	30	70	39.2857	60
5343	1	H100_DRIL32.191	H100_DRIL32.191 F2-50	Chile16_50-6	15	19	20	30	70	39.2857	62
5344	1	H100_DRIL32.191	H100_DRIL32.191 F2-60	Chile16_47-3	15	20	20	30	70	39.2857	62
5345	1	H100_DRIL32.191	H100_DRIL32.191 F2-75	Chile16_52-1	15	21	15	25	65	34.2857	62
5346	1	H100_DRIL32.191	H100_DRIL32.191 F2-78	Chile16_52-4	15	22	20	30	70	39.2857	63
5347	1	H100_DRIL32.191	H100_DRIL32.191 F2-51	Chile16_50-7	15	23	20	30	70	39.2857	64
5348	1	DRIL32.191	DRIL32.191	CL16 1396-1	15	24	15	25	55	31.4286	64
5349	1	H100_DRIL32.191	H100_DRIL32.191 F2-8	Chile16_48-8	15	25	15	30	65	36.7857	62
5350	1	H100_DRIL32.191	H100_DRIL32.191 F2-61	Chile16_47-4	15	26	20	35	65	40.3571	64
5351	1	H100_DRIL32.191	H100_DRIL32.191 F2-62	Chile16_47-5	15	27	20	30	65	37.8571	64
5352	1	H100_DRIL32.191	H100_DRIL32.191 F2-26	Chile16_51-14	16	27	15	25	65	34.2857	62
5353	1	H100_DRIL32.191	H100_DRIL32.191 F2-76	Chile16_52-2	16	26	15	25	65	34.2857	62
5354	1	H100_DRIL32.191	H100_DRIL32.191 F2-5	Chile16_48-5	16	25	20	25	70	36.7857	64
5355	1	H100_DRIL32.191	H100_DRIL32.191 F2-10	Chile16_48-10	16	24	15	25	65	34.2857	62
5356	1	H100	H100	CL14 R2139-2	16	23	20	35	80	44.6429	62
5357	1	H100_DRIL32.191	H100_DRIL32.191 F2-31	Chile16_49-4	16	22	20	30	65	37.8571	62
5358	1	H100_DRIL32.191	H100_DRIL32.191 F2-71	Chile16_47-14	16	21	20	30	65	37.8571	62
5359	1	H100_DRIL32.191	H100_DRIL32.191 F2-86	Chile16_52-12	16	20	20	30	70	39.2857	61
5360	1	H100_DRIL32.191	H100_DRIL32.191 F2-80	Chile16_52-6	16	19	20	30	65	37.8571	62
5361	1	H100_DRIL32.191	H100_DRIL32.191 F2-42	Chile16_49-15	16	18	20	30	65	37.8571	62
5362	1	H100_DRIL32.191	H100_DRIL32.191 F2-6	Chile16_48-6	16	17	20	30	70	39.2857	62
5363	1	H100_DRIL32.191	H100_DRIL32.191 F2-84	Chile16_52-10	16	16	25	35	70	42.8571	62
5364	1	H100_DRIL32.191	H100_DRIL32.191 F2-66	Chile16_47-9	16	15	25	35	70	42.8571	62
5365	1	H100_DRIL32.191	H100_DRIL32.191 F2-65	Chile16_47-8	16	14	20	30	70	39.2857	62
5366	1	H100_DRIL32.191	H100_DRIL32.191 F2-23	Chile16_51-11	16	13	20	30	70	39.2857	62
5367	1	H100_DRIL32.191	H100_DRIL32.191 F2-21	Chile16_51-9	16	12	20	30	70	39.2857	62
5368	1	H100_DRIL32.191	H100_DRIL32.191 F2-4	Chile16_48-4	16	11	20	35	70	41.7857	62
5369	1	H100_DRIL32.191	H100_DRIL32.191 F2-68	Chile16_47-11	16	10	20	30	70	39.2857	62
5370	1	H100_DRIL32.191	H100_DRIL32.191 F2-69	Chile16_47-12	16	9	20	30	70	39.2857	62
5371	1	H100_DRIL32.191	H100_DRIL32.191 F2-40	Chile16_49-13	16	8	25	35	70	42.8571	61
5372	1	H100_DRIL32.191	H100_DRIL32.191 F2-70	Chile16_47-13	16	7	25	30	70	40.3571	61
5373	1	H100_DRIL32.191	H100_DRIL32.191 F2-28	Chile16_49-1	16	6	25	30	65	38.9286	61
5374	1	H100_DRIL32.191	H100_DRIL32.191 F2-27	Chile16_51-15	16	5	25	30	65	38.9286	62
5375	1	H100_DRIL32.191	H100_DRIL32.191 F2-47	Chile16_50-3	16	4	25	30	70	40.3571	62
5376	1	H100_DRIL32.191	H100_DRIL32.191 F2-82	Chile16_52-8	16	3	25	30	70	40.3571	61
5377	1	H100_DRIL32.191	H100_DRIL32.191 F2-2	Chile16_48-2	16	2	25	30	70	40.3571	60
5378	1	H100_DRIL32.191	H100_DRIL32.191 F2-85	Chile16_52-11	16	1	25	30	70	40.3571	60
5379	1	H100_DRIL32.191	H100_DRIL32.191 F2-19	Chile16_51-7	17	1	25	35	70	42.8571	61
5380	1	H100_DRIL32.191	H100_DRIL32.191 F2-58	Chile16_47-1	17	2	20	30	65	37.8571	62
5381	1	H100_DRIL32.191	H100_DRIL32.191 F2-77	Chile16_52-3	17	3	20	30	70	39.2857	61
5382	1	H100_DRIL32.191	H100_DRIL32.191 F2-20	Chile16_51-8	17	4	25	35	70	42.8571	59
5383	1	H100	H100	CL14 R2139-2	17	5	25	35	75	44.2857	61
5384	1	H100_DRIL32.191	H100_DRIL32.191 F2-53	Chile16_50-9	17	6	20	30	65	37.8571	61
5385	1	H100_DRIL32.191	H100_DRIL32.191 F2-39	Chile16_49-12	17	7	20	30	65	37.8571	61
5386	1	H100_DRIL32.191	H100_DRIL32.191 F2-25	Chile16_51-13	17	8	25	35	70	42.8571	60
5387	1	H100_DRIL32.191	H100_DRIL32.191 F2-24	Chile16_51-12	17	9	20	35	70	41.7857	61
5388	1	H100_DRIL32.191	H100_DRIL32.191 F2-43	Chile16_49-16	17	10	25	30	70	40.3571	62
5389	1	H100_DRIL32.191	H100_DRIL32.191 F2-54	Chile16_50-10	17	11	25	35	70	42.8571	61
5390	1	H100_DRIL32.191	H100_DRIL32.191 F2-13	Chile16_51-1	17	12	20	30	70	39.2857	62
5391	1	H100_DRIL32.191	H100_DRIL32.191 F2-14	Chile16_51-2	17	13	20	30	70	39.2857	62
5392	1	H100_DRIL32.191	H100_DRIL32.191 F2-55	Chile16_50-11	17	14	20	30	70	39.2857	62
5393	1	H100_DRIL32.191	H100_DRIL32.191 F2-79	Chile16_52-5	17	15	20	30	70	39.2857	62
5394	1	H100_DRIL32.191	H100_DRIL32.191 F2-30	Chile16_49-3	17	16	20	35	70	41.7857	62
5395	1	H100_DRIL32.191	H100_DRIL32.191 F2-11	Chile16_48-11	17	17	20	30	70	39.2857	63
5396	1	H100_DRIL32.191	H100_DRIL32.191 F2-33	Chile16_49-6	17	18	20	30	70	39.2857	62
5397	1	H100_DRIL32.191	H100_DRIL32.191 F2-17	Chile16_51-5	17	19	20	30	70	39.2857	62
5398	1	H100_DRIL32.191	H100_DRIL32.191 F2-52	Chile16_50-8	17	20	20	30	70	39.2857	60
5399	1	H100_DRIL32.191	H100_DRIL32.191 F2-32	Chile16_49-5	17	21	20	30	65	37.8571	61
5400	1	H100_DRIL32.191	H100_DRIL32.191 F2-59	Chile16_47-2	17	22	20	25	65	35.3571	64
5401	1	H100_DRIL32.191	H100_DRIL32.191 F2-38	Chile16_49-11	17	23	20	30	70	39.2857	62
5402	1	H100	H100	CL14 R2139-2	17	24	20	35	70	41.7857	61
5403	1	H100_DRIL32.191	H100_DRIL32.191 F2-41	Chile16_49-14	17	25	20	30	65	37.8571	62
5404	1	H100_DRIL32.191	H100_DRIL32.191 F2-1	Chile16_48-1	17	26	20	25	65	35.3571	62
5405	1			BBP	17	27				0	#NUM!
5406	1	H100_DRIL62.030	H100_DRIL62.030 F2-29	Chile16_77-11	18	27	15	25	65	34.2857	68
5407	1	DRIL62.030	DRIL62.030	CL16 1429-1	18	26	15	25	65	34.2857	67
5408	1	H100_DRIL62.030	H100_DRIL62.030 F2-46	Chile16_80-5	18	25	20	25	65	35.3571	64
5409	1			bbp	18	24				0	#NUM!
5410	1	H100_DRIL62.030	H100_DRIL62.030 F2-24	Chile16_77-6	18	23	20	30	70	39.2857	64
5411	1	H100_DRIL62.030	H100_DRIL62.030 F2-28	Chile16_77-10	18	22	20	30	65	37.8571	67
5412	1	H100_DRIL62.030	H100_DRIL62.030 F2-8	Chile16_79-8	18	21	20	30	70	39.2857	61
5413	1	H100_DRIL62.030	H100_DRIL62.030 F2-27	Chile16_77-9	18	20	20	30	70	39.2857	64
5414	1	H100_DRIL62.030	H100_DRIL62.030 F2-43	Chile16_80-2	18	19	20	30	70	39.2857	60
5415	1	H100_DRIL62.030	H100_DRIL62.030 F2-14	Chile16_78-1	18	18	25	30	70	40.3571	62
5416	1	H100_DRIL62.030	H100_DRIL62.030 F2-48	Chile16_80-7	18	17	25	35	70	42.8571	61
5417	1	H100_DRIL62.030	H100_DRIL62.030 F2-10	Chile16_79-10	18	16	25	35	70	42.8571	61
5418	1	H100	H100	CL14 R2139-2	18	15	20	35	70	41.7857	59
5419	1	H100_DRIL62.030	H100_DRIL62.030 F2-4	Chile16_79-4	18	14	25	30	70	40.3571	64
5420	1	H100_DRIL62.030	H100_DRIL62.030 F2-15	Chile16_78-2	18	13	20	30	70	39.2857	61
5421	1	H100_DRIL62.030	H100_DRIL62.030 F2-45	Chile16_80-4	18	12	20	30	70	39.2857	65
5422	1	H100_DRIL62.030	H100_DRIL62.030 F2-9	Chile16_79-9	18	11	20	30	70	39.2857	61
5423	1	H100_DRIL62.030	H100_DRIL62.030 F2-12	Chile16_79-12	18	10	25	30	70	40.3571	63
5424	1	H100_DRIL62.030	H100_DRIL62.030 F2-3	Chile16_79-3	18	9	20	30	70	39.2857	61
5425	1	H100	H100	CL14 R2139-2	18	8	20	30	70	39.2857	60
5426	1	H100_DRIL62.030	H100_DRIL62.030 F2-20	Chile16_77-2	18	7	20	30	70	39.2857	61
5427	1	H100_DRIL62.030	H100_DRIL62.030 F2-5	Chile16_79-5	18	6	20	30	70	39.2857	62
5428	1	H100_DRIL62.030	H100_DRIL62.030 F2-42	Chile16_80-1	18	5	25	35	70	42.8571	62
5429	1	H100_DRIL62.030	H100_DRIL62.030 F2-7	Chile16_79-7	18	4	20	30	70	39.2857	64
5430	1	H100_DRIL62.030	H100_DRIL62.030 F2-23	Chile16_77-5	18	3	25	30	70	40.3571	64
5431	1	H100_DRIL62.030	H100_DRIL62.030 F2-21	Chile16_77-3	18	2	20	30	70	39.2857	63
5432	1	H100_DRIL62.030	H100_DRIL62.030 F2-26	Chile16_77-8	18	1	25	30	65	38.9286	65
5433	1	H100_DRIL62.030	H100_DRIL62.030 F2-11	Chile16_79-11	19	1	25	35	70	42.8571	61
5434	1	H100_DRIL62.030	H100_DRIL62.030 F2-19	Chile16_77-1	19	2	20	35	70	41.7857	61
5435	1	H100_DRIL62.030	H100_DRIL62.030 F2-25	Chile16_77-7	19	3	25	35	75	44.2857	61
5436	1	H100_DRIL62.030	H100_DRIL62.030 F2-49	Chile16_80-8	19	4	25	35	70	42.8571	61
5437	1	H100	H100	CL14 2141-2	19	5	25	40	75	46.7857	61
5438	1	H100_DRIL62.030	H100_DRIL62.030 F2-13	Chile16_79-13	19	6	25	35	75	44.2857	62
5439	1	H100_DRIL62.030	H100_DRIL62.030 F2-18	Chile16_78-5	19	7	20	30	70	39.2857	62
5440	1	H100_DRIL62.030	H100_DRIL62.030 F2-6	Chile16_79-6	19	8	20	35	70	41.7857	62
5441	1	H100_DRIL62.030	H100_DRIL62.030 F2-47	Chile16_80-6	19	9	20	30	70	39.2857	62
5442	1	H100_DRIL62.030	H100_DRIL62.030 F2-22	Chile16_77-4	19	10	20	35	80	44.6429	62
5443	1			BBP	19	11				0	#NUM!
5444	1	H100	H100	CL14 2141-2	19	12	25	35	80	45.7143	60
5445	1	H100_DRIL62.078	H100_DRIL62.078 F2-35	Chile16_89-7	19	13	25	30	75	41.7857	62
5446	1	H100_DRIL62.078	H100_DRIL62.078 F2-22	Chile16_90-7	19	14	25	35	75	44.2857	62
5447	1	H100_DRIL62.078	H100_DRIL62.078 F2-8	Chile16_88-8	19	15	25	35	70	42.8571	62
5448	1	H100_DRIL62.078	H100_DRIL62.078 F2-5	Chile16_88-5	19	16	20	30	65	37.8571	61
5449	1	H100_DRIL62.078	H100_DRIL62.078 F2-29	Chile16_89-1	19	17	25	30	65	38.9286	62
5450	1	H100_DRIL62.078	H100_DRIL62.078 F2-83	Chile16_92-14	19	18	25	30	65	38.9286	62
5451	1	H100_DRIL62.078	H100_DRIL62.078 F2-84	Chile16_92-15	19	19	20	30	65	37.8571	62
5452	1	H100_DRIL62.078	H100_DRIL62.078 F2-25	Chile16_90-10	19	20	20	30	50	33.5714	62
5453	1	H100_DRIL62.078	H100_DRIL62.078 F2-30	Chile16_89-2	19	21	20	30	65	37.8571	65
5454	1	H100_DRIL62.078	H100_DRIL62.078 F2-23	Chile16_90-8	19	22	20	30	65	37.8571	62
5455	1	H100_DRIL62.078	H100_DRIL62.078 F2-14	Chile16_88-14	19	23	20	30	65	37.8571	64
5456	1	H100_DRIL62.078	H100_DRIL62.078 F2-87	Chile16_92-18	19	24	20	30	65	37.8571	65
5457	1	H100_DRIL62.078	H100_DRIL62.078 F2-50	Chile16_93-4	19	25	15	30	60	35.3571	64
5458	1	H100_DRIL62.078	H100_DRIL62.078 F2-9	Chile16_88-9	19	26	15	25	60	32.8571	64
5459	1	H100_DRIL62.078	H100_DRIL62.078 F2-55	Chile16_93-9	19	27	15	25	60	32.8571	64
5460	1	H100_DRIL62.078	H100_DRIL62.078 F2-4	Chile16_88-4	20	27	15	25	60	32.8571	64
5461	1	H100_DRIL62.078	H100_DRIL62.078 F2-48	Chile16_93-2	20	26	15	25	60	32.8571	65
5462	1	H100_DRIL62.078	H100_DRIL62.078 F2-79	Chile16_92-10	20	25	20	30	65	37.8571	62
5463	1	H100_DRIL62.078	H100_DRIL62.078 F2-76	Chile16_92-7	20	24	20	30	65	37.8571	62
5464	1	H100	H100	CL14 2141-2	20	23	20	35	70	41.7857	60
5465	1	H100_DRIL62.078	H100_DRIL62.078 F2-64	Chile16_91-7	20	22	20	30	65	37.8571	63
5466	1	H100_DRIL62.078	H100_DRIL62.078 F2-11	Chile16_88-11	20	21	20	30	65	37.8571	61
5467	1	H100_DRIL62.078	H100_DRIL62.078 F2-13	Chile16_88-13	20	20	20	30	65	37.8571	61
5468	1	H100_DRIL62.078	H100_DRIL62.078 F2-63	Chile16_91-6	20	19	20	35	70	41.7857	62
5469	1	H100_DRIL62.078	H100_DRIL62.078 F2-24	Chile16_90-9	20	18	20	30	65	37.8571	62
5470	1	H100_DRIL62.078	H100_DRIL62.078 F2-27	Chile16_90-12	20	17	20	35	75	43.2143	62
5471	1	H100_DRIL62.078	H100_DRIL62.078 F2-67	Chile16_91-10	20	16	20	35	70	41.7857	61
5472	1	H100_DRIL62.078	H100_DRIL62.078 F2-86	Chile16_92-17	20	15	20	35	70	41.7857	61
5473	1	H100_DRIL62.078	H100_DRIL62.078 F2-36	Chile16_89-8	20	14	20	35	70	41.7857	61
5474	1	H100_DRIL62.078	H100_DRIL62.078 F2-17	Chile16_90-2	20	13	20	35	70	41.7857	62
5475	1	H100_DRIL62.078	H100_DRIL62.078 F2-26	Chile16_90-11	20	12	20	35	70	41.7857	62
5476	1	H100_DRIL62.078	H100_DRIL62.078 F2-74	Chile16_92-5	20	11	20	35	70	41.7857	62
5477	1	H100_DRIL62.078	H100_DRIL62.078 F2-16	Chile16_90-1	20	10	15	30	70	38.2143	62
5478	1	H100_DRIL62.078	H100_DRIL62.078 F2-37	Chile16_89-9	20	9	20	35	70	41.7857	62
5479	1	H100_DRIL62.078	H100_DRIL62.078 F2-62	Chile16_91-5	20	8	20	35	70	41.7857	63
5480	1	H100_DRIL62.078	H100_DRIL62.078 F2-69	Chile16_91-12	20	7	20	30	65	37.8571	63
5481	1	H100	H100	CL14 2141-2	20	6	20	35	75	43.2143	62
5482	1	H100_DRIL62.078	H100_DRIL62.078 F2-41	Chile16_89-13	20	5	20	35	75	43.2143	65
5483	1	H100_DRIL62.078	H100_DRIL62.078 F2-80	Chile16_92-11	20	4	20	35	70	41.7857	61
5484	1	H100_DRIL62.078	H100_DRIL62.078 F2-78	Chile16_92-9	20	3	20	35	70	41.7857	62
5485	1	H100_DRIL62.078	H100_DRIL62.078 F2-59	Chile16_91-2	20	2	20	20	70	34.2857	63
5486	1	H100	H100	CL14 2141-2	20	1	30	40	80	49.2857	59
5487	1	H100_DRIL62.078	H100_DRIL62.078 F2-6	Chile16_88-6	21	1	25	35	70	42.8571	62
5488	1	H100_DRIL62.078	H100_DRIL62.078 F2-61	Chile16_91-4	21	2	25	35	70	42.8571	64
5489	1	H100_DRIL62.078	H100_DRIL62.078 F2-34	Chile16_89-6	21	3	25	35	70	42.8571	62
5490	1	H100_DRIL62.078	H100_DRIL62.078 F2-52	Chile16_93-6	21	4	25	35	70	42.8571	64
5491	1	H100_DRIL62.078	H100_DRIL62.078 F2-81	Chile16_92-12	21	5	25	35	70	42.8571	63
5492	1	H100_DRIL62.078	H100_DRIL62.078 F2-20	Chile16_90-5	21	6	20	35	70	41.7857	63
5493	1	H100_DRIL62.078	H100_DRIL62.078 F2-60	Chile16_91-3	21	7	20	35	70	41.7857	62
5494	1	H100_DRIL62.078	H100_DRIL62.078 F2-65	Chile16_91-8	21	8	20	35	70	41.7857	63
5495	1	H100_DRIL62.078	H100_DRIL62.078 F2-38	Chile16_89-10	21	9	20	35	70	41.7857	61
5496	1	H100	H100	CL14 2141-2	21	10	25	40	75	46.7857	62
5497	1	H100_DRIL62.078	H100_DRIL62.078 F2-2	Chile16_88-2	21	11	20	35	70	41.7857	64
5498	1	H100_DRIL62.078	H100_DRIL62.078 F2-15	Chile16_88-15	21	12	25	35	70	42.8571	61
5499	1	H100_DRIL62.078	H100_DRIL62.078 F2-73	Chile16_92-4	21	13	40	35	70	46.0714	62
5500	1	H100_DRIL62.078	H100_DRIL62.078 F2-54	Chile16_93-8	21	14	20	40	70	44.2857	62
5501	1	H100_DRIL62.078	H100_DRIL62.078 F2-7	Chile16_88-7	21	15	20	35	70	41.7857	62
5502	1	H100_DRIL62.078	H100_DRIL62.078 F2-33	Chile16_89-5	21	16	25	35	70	42.8571	61
5503	1	H100_DRIL62.078	H100_DRIL62.078 F2-12	Chile16_88-12	21	17	20	30	70	39.2857	62
5504	1	H100_DRIL62.078	H100_DRIL62.078 F2-51	Chile16_93-5	21	18	20	30	70	39.2857	62
5505	1	DRIL62.078	DRIL62.078	CL16 430-1	21	19	20	30	60	36.4286	63
5506	1	H100_DRIL62.078	H100_DRIL62.078 F2-32	Chile16_89-4	21	20	20	30	65	37.8571	63
5507	1	H100_DRIL62.078	H100_DRIL62.078 F2-21	Chile16_90-6	21	21	20	30	65	37.8571	62
5508	1	H100_DRIL62.078	H100_DRIL62.078 F2-42	Chile16_89-14	21	22	20	30	65	37.8571	62
5509	1	H100_DRIL62.078	H100_DRIL62.078 F2-58	Chile16_91-1	21	23	15	30	65	36.7857	62
5510	1	H100_DRIL62.078	H100_DRIL62.078 F2-10	Chile16_88-10	21	24	15	30	65	36.7857	62
5511	1	H100_DRIL62.078	H100_DRIL62.078 F2-31	Chile16_89-3	21	25	15	30	65	36.7857	61
5512	1	H100_DRIL62.078	H100_DRIL62.078 F2-47	Chile16_93-1	21	26	15	30	65	36.7857	67
5513	1	H100_DRIL62.078	H100_DRIL62.078 F2-82	Chile16_92-13	21	27	15	25	65	34.2857	66
5514	1	H100_DRIL62.078	H100_DRIL62.078 F2-53	Chile16_93-7	22	27	15	25	60	32.8571	66
5515	1	H100_DRIL62.078	H100_DRIL62.078 F2-39	Chile16_89-11	22	26	15	25	65	34.2857	64
5516	1	H100_DRIL62.078	H100_DRIL62.078 F2-75	Chile16_92-6	22	25	15	25	60	32.8571	62
5517	1	H100_DRIL62.078	H100_DRIL62.078 F2-56	Chile16_93-10	22	24	15	30	65	36.7857	65
5518	1	H100_DRIL62.078	H100_DRIL62.078 F2-71	Chile16_92-2	22	23	15	30	65	36.7857	62
5519	1	H100_DRIL62.078	H100_DRIL62.078 F2-40	Chile16_89-12	22	22	20	30	65	37.8571	62
5520	1	H100_DRIL62.078	H100_DRIL62.078 F2-70	Chile16_92-1	22	21	20	30	65	37.8571	64
5521	1	H100_DRIL62.078	H100_DRIL62.078 F2-72	Chile16_92-3	22	20	20	30	65	37.8571	63
5522	1	H100_DRIL62.078	H100_DRIL62.078 F2-49	Chile16_93-3	22	19	20	30	70	39.2857	61
5523	1	H100_DRIL62.078	H100_DRIL62.078 F2-66	Chile16_91-9	22	18	20	35	70	41.7857	61
5524	1	H100_DRIL62.078	H100_DRIL62.078 F2-18	Chile16_90-3	22	17	35	35	70	45	59
5525	1	H100	H100	CL14 2141-2	22	16	25	40	70	45.3571	60
5526	1	H100_DRIL62.078	H100_DRIL62.078 F2-57	Chile16_93-11	22	15	20	35	65	40.3571	62
5527	1			BBP	22	14				0	#NUM!
5528	1	H100_DRIL72.040	H100_DRIL72.040 F2-11	Chile16_128-4	22	13	20	35	70	41.7857	61
5529	1	H100_DRIL72.040	H100_DRIL72.040 F2-32	Chile16_126-2	22	12	20	35	70	41.7857	61
5530	1	H100_DRIL72.040	H100_DRIL72.040 F2-28	Chile16_129-12	22	11	20	35	55	37.5	61
5531	1	H100_DRIL72.040	H100_DRIL72.040 F2-39	Chile16_126-9	22	10	20	30	65	37.8571	64
5532	1	H100_DRIL72.040	H100_DRIL72.040 F2-31	Chile16_126-1	22	9	20	35	70	41.7857	61
5533	1	H100_DRIL72.040	H100_DRIL72.040 F2-49	Chile16_127-9	22	8	20	35	55	37.5	60
5534	1	H100_DRIL72.040	H100_DRIL72.040 F2-14	Chile16_128-7	22	7	20	20	70	34.2857	63
5535	1	H100_DRIL72.040	H100_DRIL72.040 F2-15	Chile16_128-8	22	6	20	35	70	41.7857	62
5536	1	H100_DRIL72.040	H100_DRIL72.040 F2-64	Chile16_124-12	22	5	20	35	70	41.7857	61
5537	1	H100_DRIL72.040	H100_DRIL72.040 F2-43	Chile16_127-3	22	4	25	40	70	45.3571	59
5538	1	H100_DRIL72.040	H100_DRIL72.040 F2-8	Chile16_128-1	22	3	25	40	70	45.3571	60
5539	1	H100_DRIL72.040	H100_DRIL72.040 F2-17	Chile16_129-1	22	2	25	35	70	42.8571	61
5540	1	H100_DRIL72.040	H100_DRIL72.040 F2-37	Chile16_126-7	22	1	20	30	70	39.2857	64
5541	1	H100_DRIL72.040	H100_DRIL72.040 F2-24	Chile16_129-8	23	1	20	30	70	39.2857	61
5542	1	H100_DRIL72.040	H100_DRIL72.040 F2-59	Chile16_124-7	23	2	25	35	70	42.8571	61
5543	1	H100_DRIL72.040	H100_DRIL72.040 F2-54	Chile16_124-2	23	3	25	35	70	42.8571	61
5544	1	DRIL72.040	DRIL72.040	CL16 649-1	23	4	25	30	65	38.9286	60
5545	1	H100	H100	CL14 2141-2	23	5	25	40	75	46.7857	59
5546	1	H100_DRIL72.040	H100_DRIL72.040 F2-29	Chile16_129-13	23	6	20	35	65	40.3571	59
5547	1	H100_DRIL72.040	H100_DRIL72.040 F2-27	Chile16_129-11	23	7	20	30	65	37.8571	60
5548	1	H100_DRIL72.040	H100_DRIL72.040 F2-63	Chile16_124-11	23	8	25	35	65	41.4286	59
5549	1	H100_DRIL72.040	H100_DRIL72.040 F2-18	Chile16_129-2	23	9	20	30	65	37.8571	62
5550	1	H100_DRIL72.040	H100_DRIL72.040 F2-38	Chile16_126-8	23	10	20	30	65	37.8571	64
5551	1	H100_DRIL72.040	H100_DRIL72.040 F2-42	Chile16_127-2	23	11	20	30	65	37.8571	62
5552	1	H100	H100	CL14 2141-2	23	12	20	35	70	41.7857	61
5553	1	H100_DRIL72.040	H100_DRIL72.040 F2-62	Chile16_124-10	23	13	20	30	65	37.8571	62
5554	1	H100_DRIL72.040	H100_DRIL72.040 F2-16	Chile16_128-9	23	14	20	30	65	37.8571	62
5555	1	H100_DRIL72.040	H100_DRIL72.040 F2-5	Chile16_125-5	23	15	25	35	70	42.8571	61
5556	1	H100_DRIL72.040	H100_DRIL72.040 F2-41	Chile16_127-1	23	16	25	35	70	42.8571	62
5557	1	H100_DRIL72.040	H100_DRIL72.040 F2-25	Chile16_129-9	23	17	20	30	65	37.8571	62
5558	1	H100_DRIL72.040	H100_DRIL72.040 F2-22	Chile16_129-6	23	18	20	30	65	37.8571	66
5559	1	H100_DRIL72.040	H100_DRIL72.040 F2-4	Chile16_125-4	23	19	20	30	65	37.8571	61
5560	1	H100_DRIL72.040	H100_DRIL72.040 F2-47	Chile16_127-7	23	20	20	30	50	33.5714	62
5561	1	H100_DRIL72.040	H100_DRIL72.040 F2-35	Chile16_126-5	23	21	20	30	60	36.4286	65
5562	1	H100_DRIL72.040	H100_DRIL72.040 F2-9	Chile16_128-2	23	22	20	30	60	36.4286	62
5563	1	H100	H100	CL14 2141-2	23	23	25	35	65	41.4286	61
5564	1	H100_DRIL72.040	H100_DRIL72.040 F2-1	Chile16_125-1	23	24	15	25	60	32.8571	61
5565	1	H100_DRIL72.040	H100_DRIL72.040 F2-26	Chile16_129-10	23	25	15	25	60	32.8571	62
5566	1	H100_DRIL72.040	H100_DRIL72.040 F2-52	Chile16_127-12	23	26	10	25	55	30.3571	65
5567	1	H100_DRIL72.040	H100_DRIL72.040 F2-30	Chile16_129-14	23	27	10	25	55	30.3571	72
5568	1	H100_DRIL72.040	H100_DRIL72.040 F2-23	Chile16_129-7	24	27	10	25	50	28.9286	64
5569	1	H100_DRIL72.040	H100_DRIL72.040 F2-10	Chile16_128-3	24	26	10	25	50	28.9286	63
5570	1	H100_DRIL72.040	H100_DRIL72.040 F2-46	Chile16_127-6	24	25	10	25	50	28.9286	64
5571	1	H100_DRIL72.040	H100_DRIL72.040 F2-34	Chile16_126-4	24	24	15	25	55	31.4286	64
5572	1	H100_DRIL72.040	H100_DRIL72.040 F2-58	Chile16_124-6	24	23	15	25	55	31.4286	65
5573	1	H100_DRIL72.040	H100_DRIL72.040 F2-44	Chile16_127-4	24	22	20	30	55	35	66
5574	1	H100_DRIL72.040	H100_DRIL72.040 F2-21	Chile16_129-5	24	21	20	30	60	36.4286	64
5575	1	H100_DRIL72.040	H100_DRIL72.040 F2-45	Chile16_127-5	24	20	20	30	65	37.8571	61
5576	1	H100_DRIL72.040	H100_DRIL72.040 F2-2	Chile16_125-2	24	19	20	30	65	37.8571	64
5577	1	H100_DRIL72.040	H100_DRIL72.040 F2-13	Chile16_128-6	24	18	20	30	65	37.8571	62
5578	1	H100_DRIL72.040	H100_DRIL72.040 F2-19	Chile16_129-3	24	17	20	30	65	37.8571	61
5579	1	H100_DRIL72.040	H100_DRIL72.040 F2-51	Chile16_127-11	24	16	20	30	65	37.8571	62
5580	1	H100_DRIL72.040	H100_DRIL72.040 F2-61	Chile16_124-9	24	15	20	30	65	37.8571	62
5581	1	H100_DRIL72.040	H100_DRIL72.040 F2-60	Chile16_124-8	24	14	15	30	65	36.7857	62
5582	1	H100_DRIL72.040	H100_DRIL72.040 F2-40	Chile16_126-10	24	13	20	30	65	37.8571	62
5583	1	H100_DRIL72.040	H100_DRIL72.040 F2-48	Chile16_127-8	24	12	20	30	65	37.8571	62
5584	1	H100_DRIL72.040	H100_DRIL72.040 F2-56	Chile16_124-4	24	11	20	30	65	37.8571	63
5585	1	H100_DRIL72.040	H100_DRIL72.040 F2-57	Chile16_124-5	24	10	20	30	65	37.8571	63
5586	1	H100	H100	CL14 2141-2	24	9	25	40	75	46.7857	59
5587	1	H100_DRIL72.040	H100_DRIL72.040 F2-20	Chile16_129-4	24	8	25	35	70	42.8571	60
5588	1	H100_DRIL72.040	H100_DRIL72.040 F2-53	Chile16_124-1	24	7	25	35	70	42.8571	61
5589	1	H100_DRIL72.040	H100_DRIL72.040 F2-12	Chile16_128-5	24	6	25	35	70	42.8571	61
5590	1	H100_DRIL72.040	H100_DRIL72.040 F2-50	Chile16_127-10	24	5	25	35	70	42.8571	60
5591	1	H100_DRIL72.040	H100_DRIL72.040 F2-55	Chile16_124-3	24	4	25	35	70	42.8571	59
5592	1	H100_DRIL72.040	H100_DRIL72.040 F2-3	Chile16_125-3	24	3	20	35	70	41.7857	59
5593	1			bbp	24	2				0	#NUM!
5594	1	H100_DRIL52.055	H100_DRIL52.055 F2-59	Chile16_57-17	3	32	20	30	55	35	63
5595	1	H100_DRIL52.055	H100_DRIL52.055 F2-2	Chile16_53-2	3	33	15	30	60	35.3571	62
5596	1	H100_DRIL52.055	H100_DRIL52.055 F2-16	Chile16_56-9	3	34	20	25	55	32.5	66
5597	1	H100_DRIL52.055	H100_DRIL52.055 F2-18	Chile16_56-11	3	35	20	30	60	36.4286	62
5598	1	H100_DRIL52.055	H100_DRIL52.055 F2-33	Chile16_58-12	3	36	15	30	60	35.3571	62
5599	1	H100	H100	CL14 2141-2	3	37	10	30	70	37.1429	61
5600	1	H100_DRIL52.055	H100_DRIL52.055 F2-56	Chile16_57-14	3	38	10	25	55	30.3571	66
5601	1	H100_DRIL52.055	H100_DRIL52.055 F2-31	Chile16_58-10	3	39	15	25	60	32.8571	63
5602	1	H100	H100	CL14 2141-2	3	40	10	25	70	34.6429	61
5603	1	H100_DRIL52.055	H100_DRIL52.055 F2-25	Chile16_58-4	3	41	15	25	55	31.4286	61
5604	1	H100_DRIL52.055	H100_DRIL52.055 F2-8	Chile16_56-1	3	42	10	25	60	31.7857	65
5605	1	H100_DRIL52.055	H100_DRIL52.055 F2-65	Chile16_55-4	3	43	10	25	55	30.3571	63
5606	1	H100_DRIL52.055	H100_DRIL52.055 F2-5	Chile16_53-5	3	44	10	25	55	30.3571	63
5607	1	H100_DRIL52.055	H100_DRIL52.055 F2-34	Chile16_58-13	3	45	15	25	60	32.8571	63
5608	1	H100_DRIL52.055	H100_DRIL52.055 F2-54	Chile16_57-12	3	46	10	25	60	31.7857	62
5609	1	H100_DRIL52.055	H100_DRIL52.055 F2-19	Chile16_56-12	3	47	10	20	55	27.8571	63
5610	1	H100_DRIL52.055	H100_DRIL52.055 F2-50	Chile16_57-8	3	48	10	25	55	30.3571	64
5611	1	H100_DRIL52.055	H100_DRIL52.055 F2-66	Chile16_55-5	3	49	15	25	60	32.8571	64
5612	1	H100_DRIL52.055	H100_DRIL52.055 F2-45	Chile16_57-3	3	50	15	25	55	31.4286	61
5613	1	H100_DRIL52.055	H100_DRIL52.055 F2-67	Chile16_55-6	3	51	10	25	55	30.3571	63
5614	1	H100_DRIL52.055	H100_DRIL52.055 F2-44	Chile16_57-2	3	52	15	30	65	36.7857	62
5615	1	H100_DRIL52.055	H100_DRIL52.055 F2-49	Chile16_57-7	3	53	15	30	65	36.7857	62
5616	1	H100_DRIL52.055	H100_DRIL52.055 F2-29	Chile16_58-8	3	54	15	25	60	32.8571	61
5617	1	H100_DRIL52.055	H100_DRIL52.055 F2-63	Chile16_55-2	3	55	15	30	65	36.7857	64
5618	1	H100_DRIL52.055	H100_DRIL52.055 F2-58	Chile16_57-16	3	56	15	25	60	32.8571	63
5619	1	H100_DRIL52.055	H100_DRIL52.055 F2-14	Chile16_56-7	3	57	15	30	65	36.7857	63
5620	1	H100_DRIL52.055	H100_DRIL52.055 F2-57	Chile16_57-15	3	58	15	25	60	32.8571	62
5621	1	H100_DRIL52.055	H100_DRIL52.055 F2-20	Chile16_56-13	4	58	15	25	60	32.8571	73
5622	1	H100_DRIL52.055	H100_DRIL52.055 F2-4	Chile16_53-4	4	57	15	25	65	34.2857	61
5623	1	H100	H100	CL14 2141-2	4	56	20	30	70	39.2857	60
5624	1	H100_DRIL52.055	H100_DRIL52.055 F2-13	Chile16_56-6	4	55	15	30	65	36.7857	61
5625	1	H100_DRIL52.055	H100_DRIL52.055 F2-30	Chile16_58-9	4	54	15	30	70	38.2143	61
5626	1	H100_DRIL52.055	H100_DRIL52.055 F2-36	Chile16_54-2	4	53	15	25	55	31.4286	61
5627	1	H100_DRIL52.055	H100_DRIL52.055 F2-11	Chile16_56-4	4	52	20	30	70	39.2857	62
5628	1	H100_DRIL52.055	H100_DRIL52.055 F2-12	Chile16_56-5	4	51	10	25	55	30.3571	62
5629	1	H100_DRIL52.055	H100_DRIL52.055 F2-51	Chile16_57-9	4	50	15	25	60	32.8571	63
5630	1	H100_DRIL52.055	H100_DRIL52.055 F2-68	Chile16_55-7	4	49	15	25	60	32.8571	64
5631	1	H100_DRIL52.055	H100_DRIL52.055 F2-9	Chile16_56-2	4	48	10	20	65	30.7143	73
5632	1	H100_DRIL52.055	H100_DRIL52.055 F2-15	Chile16_56-8	4	47	10	25	65	33.2143	62
5633	1	H100_DRIL52.055	H100_DRIL52.055 F2-23	Chile16_58-2	4	46	10	20	55	27.8571	61
5634	1	H100_DRIL52.055	H100_DRIL52.055 F2-26	Chile16_58-5	4	45	10	20	55	27.8571	68
5635	1	H100_DRIL52.055	H100_DRIL52.055 F2-27	Chile16_58-6	4	44	15	25	65	34.2857	65
5636	1	H100_DRIL52.055	H100_DRIL52.055 F2-43	Chile16_57-1	4	43	15	25	60	32.8571	63
5637	1	H100_DRIL52.055	H100_DRIL52.055 F2-28	Chile16_58-7	4	42	15	25	60	32.8571	61
5638	1	H100_DRIL52.055	H100_DRIL52.055 F2-6	Chile16_53-6	4	41	15	25	55	31.4286	60
5639	1	H100_DRIL52.055	H100_DRIL52.055 F2-52	Chile16_57-10	4	40	15	25	65	34.2857	65
5640	1	H100_DRIL52.055	H100_DRIL52.055 F2-46	Chile16_57-4	4	39	10	20	60	29.2857	68
5641	1	DRIL52.055	DRIL52.055	CL16 1412-1	4	38	5	15	40	20	67
5642	1	H100_DRIL52.055	H100_DRIL52.055 F2-38	Chile16_54-4	4	37	10	20	55	27.8571	65
5643	1	H100_DRIL52.055	H100_DRIL52.055 F2-1	Chile16_53-1	4	36	15	25	60	32.8571	61
5644	1	H100	H100	CL14 2141-2	4	35	20	30	70	39.2857	60
5645	1	H100_DRIL52.055	H100_DRIL52.055 F2-62	Chile16_55-1	4	34	20	25	65	35.3571	63
5646	1	H100_DRIL52.055	H100_DRIL52.055 F2-21	Chile16_56-14	4	33	20	25	65	35.3571	60
5647	1	H100_DRIL52.055	H100_DRIL52.055 F2-40	Chile16_54-6	4	32	20	30	65	37.8571	61
5648	1	H100_DRIL52.055	H100_DRIL52.055 F2-61	Chile16_57-19	5	32	20	25	65	35.3571	59
5649	1	H100_DRIL52.055	H100_DRIL52.055 F2-24	Chile16_58-3	5	33	15	25	60	32.8571	60
5650	1	H100_DRIL52.055	H100_DRIL52.055 F2-41	Chile16_54-7	5	34	15	25	60	32.8571	62
5651	1	H100_DRIL52.055	H100_DRIL52.055 F2-10	Chile16_56-3	5	35	20	25	65	35.3571	61
5652	1	H100_DRIL52.055	H100_DRIL52.055 F2-64	Chile16_55-3	5	36	15	20	60	30.3571	60
5653	1	H100_DRIL52.055	H100_DRIL52.055 F2-47	Chile16_57-5	5	37	15	25	60	32.8571	63
5654	1	H100_DRIL52.055	H100_DRIL52.055 F2-42	Chile16_54-8	5	38	15	20	60	30.3571	62
5655	1	H100_DRIL52.055	H100_DRIL52.055 F2-37	Chile16_54-3	5	39	10	20	55	27.8571	65
5656	1	H100_DRIL52.055	H100_DRIL52.055 F2-32	Chile16_58-11	5	40	10	20	55	27.8571	65
5657	1	H100_DRIL52.055	H100_DRIL52.055 F2-48	Chile16_57-6	5	41	15	25	55	31.4286	63
5658	1	H100_DRIL52.055	H100_DRIL52.055 F2-3	Chile16_53-3	5	42	15	25	55	31.4286	63
5659	1	H100_DRIL52.055	H100_DRIL52.055 F2-17	Chile16_56-10	5	43	15	25	60	32.8571	62
5660	1	H100_DRIL52.055	H100_DRIL52.055 F2-39	Chile16_54-5	5	44	15	25	65	34.2857	62
5661	1	H100_DRIL52.055	H100_DRIL52.055 F2-60	Chile16_57-18	5	45	10	20	65	30.7143	67
5662	1	H100_DRIL52.055	H100_DRIL52.055 F2-7	Chile16_53-7	5	46	15	25	65	34.2857	63
5663	1			BBP	5	47				0	#NUM!
5664	1	H100_DRIL32.090	H100_DRIL32.090 F2-55	Chile16_28-4	5	48	15	25	65	34.2857	63
5665	1	H100_DRIL32.090	H100_DRIL32.090 F2-56	Chile16_28-5	5	49	15	25	65	34.2857	63
5666	1	H100_DRIL32.090	H100_DRIL32.090 F2-18	Chile16_26-4	5	50	15	25	60	32.8571	63
5667	1	H100_DRIL32.090	H100_DRIL32.090 F2-30	Chile16_26-16	5	51	15	25	60	32.8571	61
5668	1	H100	H100	CL14 2141-2	5	52	20	30	70	39.2857	60
5669	1	H100_DRIL32.090	H100_DRIL32.090 F2-57	Chile16_28-6	5	53	20	30	65	37.8571	62
5670	1	H100_DRIL32.090	H100_DRIL32.090 F2-23	Chile16_26-9	5	54	20	30	65	37.8571	61
5671	1	H100	H100	CL14 2141-2	5	55	25	35	70	42.8571	59
5672	1	H100_DRIL32.090	H100_DRIL32.090 F2-64	Chile16_23-6	5	56	20	25	60	33.9286	62
5673	1	H100_DRIL32.090	H100_DRIL32.090 F2-13	Chile16_24-13	5	57	20	25	60	33.9286	62
5674	1	H100_DRIL32.090	H100_DRIL32.090 F2-50	Chile16_27-10	5	58	20	25	60	33.9286	73
5675	1	H100_DRIL32.090	H100_DRIL32.090 F2-37	Chile16_25-7	6	58	15	25	60	32.8571	62
5676	1			bbp	6	57				0	#NUM!
5677	1	H100_DRIL32.090	H100_DRIL32.090 F2-42	Chile16_27-2	6	56	20	30	65	37.8571	62
5678	1	H100_DRIL32.090	H100_DRIL32.090 F2-27	Chile16_26-13	6	55	20	30	65	37.8571	62
5679	1	H100	H100	CL14 2141-2	6	54	25	35	75	44.2857	60
5680	1	H100_DRIL32.090	H100_DRIL32.090 F2-49	Chile16_27-9	6	53	15	25	60	32.8571	65
5681	1	H100_DRIL32.090	H100_DRIL32.090 F2-9	Chile16_24-9	6	52	20	30	65	37.8571	60
5682	1	H100_DRIL32.090	H100_DRIL32.090 F2-68	Chile16_23-10	6	51	20	30	65	37.8571	62
5683	1	H100_DRIL32.090	H100_DRIL32.090 F2-70	Chile16_23-12	6	50	15	25	60	32.8571	64
5684	1	H100_DRIL32.090	H100_DRIL32.090 F2-65	Chile16_23-7	6	49	15	25	55	31.4286	67
5685	1	H100_DRIL32.090	H100_DRIL32.090 F2-31	Chile16_25-1	6	48	15	25	65	34.2857	62
5686	1	H100_DRIL32.090	H100_DRIL32.090 F2-47	Chile16_27-7	6	47	15	20	60	30.3571	62
5687	1	H100_DRIL32.090	H100_DRIL32.090 F2-51	Chile16_27-11	6	46	15	25	65	34.2857	64
5688	1	H100_DRIL32.090	H100_DRIL32.090 F2-43	Chile16_27-3	6	45	cs	cs	cs		66
5689	1	H100_DRIL32.090	H100_DRIL32.090 F2-33	Chile16_25-3	6	44	10	20	55	27.8571	64
5690	1	H100	H100	CL14 2141-2	6	43	15	30	65	36.7857	60
5691	1	H100_DRIL32.090	H100_DRIL32.090 F2-60	Chile16_23-2	6	42	15	25	60	32.8571	64
5692	1	H100_DRIL32.090	H100_DRIL32.090 F2-6	Chile16_24-6	6	41	15	25	60	32.8571	62
5693	1	H100_DRIL32.090	H100_DRIL32.090 F2-32	Chile16_25-2	6	40	15	25	60	32.8571	63
5694	1	H100_DRIL32.090	H100_DRIL32.090 F2-14	Chile16_24-14	6	39	15	25	60	32.8571	64
5695	1	H100_DRIL32.090	H100_DRIL32.090 F2-4	Chile16_24-4	6	38	10	25	60	31.7857	62
5696	1	H100_DRIL32.090	H100_DRIL32.090 F2-5	Chile16_24-5	6	37	15	25	55	31.4286	64
5697	1	H100_DRIL32.090	H100_DRIL32.090 F2-12	Chile16_24-12	6	36	15	25	55	31.4286	63
5698	1	H100_DRIL32.090	H100_DRIL32.090 F2-44	Chile16_27-4	6	35	15	25	60	32.8571	62
5699	1	H100_DRIL32.090	H100_DRIL32.090 F2-15	Chile16_26-1	6	34	15	25	55	31.4286	62
5700	1	H100_DRIL32.090	H100_DRIL32.090 F2-40	Chile16_25-10	6	33	20	25	55	32.5	62
5701	1	H100_DRIL32.090	H100_DRIL32.090 F2-53	Chile16_28-2	6	32	20	20	40	25.7143	54
5702	1	H100_DRIL32.090	H100_DRIL32.090 F2-24	Chile16_26-10	7	32	20	30	60	36.4286	61
5703	1	H100_DRIL32.090	H100_DRIL32.090 F2-19	Chile16_26-5	7	33	15	30	65	36.7857	62
5704	1	H100_DRIL32.090	H100_DRIL32.090 F2-26	Chile16_26-12	7	34	20	30	65	37.8571	63
5705	1	H100_DRIL32.090	H100_DRIL32.090 F2-62	Chile16_23-4	7	35	20	30	65	37.8571	61
5706	1	H100_DRIL32.090	H100_DRIL32.090 F2-59	Chile16_23-1	7	36	15	25	60	32.8571	64
5707	1	H100_DRIL32.090	H100_DRIL32.090 F2-38	Chile16_25-8	7	37	10	25	50	28.9286	63
5708	1	H100_DRIL32.090	H100_DRIL32.090 F2-48	Chile16_27-8	7	38	10	25	55	30.3571	63
5709	1	H100_DRIL32.090	H100_DRIL32.090 F2-8	Chile16_24-8	7	39	5	25	55	29.2857	64
5710	1	H100_DRIL32.090	H100_DRIL32.090 F2-34	Chile16_25-4	7	40	15	30	65	36.7857	63
5711	1	H100_DRIL32.090	H100_DRIL32.090 F2-63	Chile16_23-5	7	41	15	30	65	36.7857	62
5712	1	H100_DRIL32.090	H100_DRIL32.090 F2-1	Chile16_24-1	7	42	15	30	65	36.7857	61
5713	1	H100_DRIL32.090	H100_DRIL32.090 F2-67	Chile16_23-9	7	43	15	30	65	36.7857	64
5714	1	H100_DRIL32.090	H100_DRIL32.090 F2-69	Chile16_23-11	7	44	15	25	65	34.2857	64
5715	1	H100_DRIL32.090	H100_DRIL32.090 F2-22	Chile16_26-8	7	45	15	25	65	34.2857	66
5716	1	H100	H100	CL14 2141 blk	7	46	20	30	65	37.8571	61
5717	1	H100_DRIL32.090	H100_DRIL32.090 F2-41	Chile16_27-1	7	47	15	25	60	32.8571	64
5718	1	H100_DRIL32.090	H100_DRIL32.090 F2-29	Chile16_26-15	7	48	15	25	60	32.8571	64
5719	1	DRIL32.090	DRIL32.090	CL16 175-1	7	49	5	20	50	25.3571	64
5720	1	H100_DRIL32.090	H100_DRIL32.090 F2-61	Chile16_23-3	7	50	15	25	60	32.8571	62
5721	1	H100_DRIL32.090	H100_DRIL32.090 F2-45	Chile16_27-5	7	51	15	30	65	36.7857	62
5722	1	H100_DRIL32.090	H100_DRIL32.090 F2-54	Chile16_28-3	7	52	15	30	65	36.7857	61
5723	1	H100_DRIL32.090	H100_DRIL32.090 F2-21	Chile16_26-7	7	53	20	30	65	37.8571	62
5724	1	H100_DRIL32.090	H100_DRIL32.090 F2-25	Chile16_26-11	7	54	20	30	65	37.8571	63
5725	1	H100_DRIL32.090	H100_DRIL32.090 F2-10	Chile16_24-10	7	55	20	30	65	37.8571	60
5726	1	H100_DRIL32.090	H100_DRIL32.090 F2-16	Chile16_26-2	7	56	20	30	65	37.8571	62
5727	1	H100_DRIL32.090	H100_DRIL32.090 F2-58	Chile16_28-7	7	57	15	25	60	32.8571	64
5728	1	H100_DRIL32.090	H100_DRIL32.090 F2-11	Chile16_24-11	7	58	15	25	65	34.2857	62
5729	1	H100_DRIL32.090	H100_DRIL32.090 F2-28	Chile16_26-14	8	58	20	30	60	36.4286	61
5730	1	H100_DRIL32.090	H100_DRIL32.090 F2-7	Chile16_24-7	8	57	15	30	65	36.7857	62
5731	1	H100_DRIL32.090	H100_DRIL32.090 F2-3	Chile16_24-3	8	56	15	30	65	36.7857	62
5732	1	H100_DRIL32.090	H100_DRIL32.090 F2-2	Chile16_24-2	8	55	15	30	60	35.3571	61
5733	1	H100_DRIL32.090	H100_DRIL32.090 F2-17	Chile16_26-3	8	54	15	30	65	36.7857	61
5734	1			BBP	8	53				0	#NUM!
5735	1	H100_DRIL32.095	H100_DRIL32.095 F2-28	Chile16_32-3	8	52	15	25	60	32.8571	64
5736	1	H100_DRIL32.095	H100_DRIL32.095 F2-25	Chile16_31-11	8	51	15	25	60	32.8571	63
5737	1	H100_DRIL32.095	H100_DRIL32.095 F2-15	Chile16_31-1	8	50	15	25	60	32.8571	60
5738	1	H100_DRIL32.095	H100_DRIL32.095 F2-71	Chile16_30-11	8	49	15	25	60	32.8571	64
5739	1	H100_DRIL32.095	H100_DRIL32.095 F2-83	Chile16_29-10	8	48	15	25	60	32.8571	61
5740	1	H100_DRIL32.095	H100_DRIL32.095 F2-16	Chile16_31-2	8	47	15	25	60	32.8571	62
5741	1	H100_DRIL32.095	H100_DRIL32.095 F2-50	Chile16_34-8	8	46	15	25	60	32.8571	65
5742	1	DRIL32.095	DRIL32.095	cl16 1393-1	8	45	15	20	55	28.9286	68
5743	1	H100_DRIL32.095	H100_DRIL32.095 F2-81	Chile16_29-8	8	44	20	25	60	33.9286	65
5744	1	H100	H100	CL14 2141 blk	8	43	20	30	70	39.2857	61
5745	1	H100_DRIL32.095	H100_DRIL32.095 F2-22	Chile16_31-8	8	42	20	30	65	37.8571	62
5746	1	H100_DRIL32.095	H100_DRIL32.095 F2-49	Chile16_34-7	8	41	15	30	65	36.7857	64
5747	1	H100_DRIL32.095	H100_DRIL32.095 F2-58	Chile16_34-16	8	40	15	20	60	30.3571	64
5748	1	H100_DRIL32.095	H100_DRIL32.095 F2-46	Chile16_34-4	8	39	15	25	65	34.2857	65
5749	1	H100_DRIL32.095	H100_DRIL32.095 F2-66	Chile16_30-6	8	38	15	25	60	32.8571	63
5750	1	H100_DRIL32.095	H100_DRIL32.095 F2-80	Chile16_29-7	8	37	15	25	60	32.8571	62
5751	1	H100_DRIL32.095	H100_DRIL32.095 F2-39	Chile16_32-14	8	36	15	25	60	32.8571	62
5752	1	H100_DRIL32.095	H100_DRIL32.095 F2-63	Chile16_30-3	8	35	15	25	60	32.8571	62
5753	1	H100_DRIL32.095	H100_DRIL32.095 F2-51	Chile16_34-9	8	34	15	25	60	32.8571	62
5754	1	H100_DRIL32.095	H100_DRIL32.095 F2-44	Chile16_34-2	8	33	20	25	55	32.5	63
5755	1	H100_DRIL32.095	H100_DRIL32.095 F2-54	Chile16_34-12	8	32	20	30	65	37.8571	61
5756	1	H100_DRIL32.095	H100_DRIL32.095 F2-53	Chile16_34-11	9	32	20	30	60	36.4286	61
5757	1	H100	H100	CL14 2141 blk	9	33	20	35	70	41.7857	60
5758	1	H100_DRIL32.095	H100_DRIL32.095 F2-29	Chile16_32-4	9	34	15	30	65	36.7857	65
5759	1	H100_DRIL32.095	H100_DRIL32.095 F2-1	Chile16_33-1	9	35	20	30	65	37.8571	65
5760	1	H100_DRIL32.095	H100_DRIL32.095 F2-61	Chile16_30-1	9	36	15	25	60	32.8571	63
5761	1	H100_DRIL32.095	H100_DRIL32.095 F2-17	Chile16_31-3	9	37	15	25	60	32.8571	64
5762	1	H100_DRIL32.095	H100_DRIL32.095 F2-84	Chile16_29-11	9	38	15	25	60	32.8571	62
5763	1	H100_DRIL32.095	H100_DRIL32.095 F2-68	Chile16_30-8	9	39	15	25	60	32.8571	64
5764	1	H100_DRIL32.095	H100_DRIL32.095 F2-64	Chile16_30-4	9	40	15	25	65	34.2857	65
5765	1	H100_DRIL32.095	H100_DRIL32.095 F2-67	Chile16_30-7	9	41	15	25	65	34.2857	62
5766	1	H100_DRIL32.095	H100_DRIL32.095 F2-86	Chile16_29-13	9	42	15	25	65	34.2857	60
5767	1	H100_DRIL32.095	H100_DRIL32.095 F2-48	Chile16_34-6	9	43	15	25	65	34.2857	62
5768	1	H100_DRIL32.095	H100_DRIL32.095 F2-42	Chile16_32-17	9	44	15	25	65	34.2857	62
5769	1	H100_DRIL32.095	H100_DRIL32.095 F2-55	Chile16_34-13	9	45	20	25	65	35.3571	62
5770	1	H100_DRIL32.095	H100_DRIL32.095 F2-82	Chile16_29-9	9	46	20	25	65	35.3571	62
5771	1	H100_DRIL32.095	H100_DRIL32.095 F2-2	Chile16_33-2	9	47	20	25	50	31.0714	62
5772	1	H100_DRIL32.095	H100_DRIL32.095 F2-14	Chile16_33-14	9	48	15	25	65	34.2857	64
5773	1	H100_DRIL32.095	H100_DRIL32.095 F2-38	Chile16_32-13	9	49	20	25	65	35.3571	62
5774	1	H100	H100	CL14 2141 blk	9	50	20	30	65	37.8571	64
5775	1	H100_DRIL32.095	H100_DRIL32.095 F2-30	Chile16_32-5	9	51	20	25	65	35.3571	62
5776	1	H100_DRIL32.095	H100_DRIL32.095 F2-47	Chile16_34-5	9	52	15	25	60	32.8571	61
5777	1	H100_DRIL32.095	H100_DRIL32.095 F2-74	Chile16_29-1	9	53	20	30	65	37.8571	61
5778	1	H100	H100	CL14 2141 blk	9	54	20	35	65	40.3571	61
5779	1	H100_DRIL32.095	H100_DRIL32.095 F2-24	Chile16_31-10	9	55	20	30	65	37.8571	62
5780	1	H100_DRIL32.095	H100_DRIL32.095 F2-43	Chile16_34-1	9	56	20	30	65	37.8571	62
5781	1	H100_DRIL32.095	H100_DRIL32.095 F2-79	Chile16_29-6	9	57	15	30	65	36.7857	64
5782	1	H100_DRIL32.095	H100_DRIL32.095 F2-12	Chile16_33-12	9	58	15	25	65	34.2857	62
5783	1	H100_DRIL32.095	H100_DRIL32.095 F2-10	Chile16_33-10	10	58	20	30	65	37.8571	62
5784	1	H100_DRIL32.095	H100_DRIL32.095 F2-36	Chile16_32-11	10	57	20	25	60	33.9286	64
5785	1	H100_DRIL32.095	H100_DRIL32.095 F2-7	Chile16_33-7	10	56	20	30	65	37.8571	63
5786	1	H100_DRIL32.095	H100_DRIL32.095 F2-5	Chile16_33-5	10	55	20	30	65	37.8571	62
5787	1	H100_DRIL32.095	H100_DRIL32.095 F2-13	Chile16_33-13	10	54	20	30	65	37.8571	62
5788	1	H100_DRIL32.095	H100_DRIL32.095 F2-73	Chile16_30-13	10	53	15	30	65	36.7857	62
5789	1	H100_DRIL32.095	H100_DRIL32.095 F2-11	Chile16_33-11	10	52	20	30	65	37.8571	62
5790	1	H100_DRIL32.095	H100_DRIL32.095 F2-18	Chile16_31-4	10	51	15	25	60	32.8571	62
5791	1	H100_DRIL32.095	H100_DRIL32.095 F2-34	Chile16_32-9	10	50	15	25	60	32.8571	62
5792	1	H100_DRIL32.095	H100_DRIL32.095 F2-19	Chile16_31-5	10	49	15	25	60	32.8571	62
5793	1	H100_DRIL32.095	H100_DRIL32.095 F2-75	Chile16_29-2	10	48	15	25	60	32.8571	65
5794	1	H100_DRIL32.095	H100_DRIL32.095 F2-31	Chile16_32-6	10	47	20	25	65	35.3571	65
5795	1	H100	H100	CL14 2141 blk	10	46	20	30	70	39.2857	61
5796	1	H100_DRIL32.095	H100_DRIL32.095 F2-85	Chile16_29-12	10	45	20	25	60	33.9286	61
5797	1	H100_DRIL32.095	H100_DRIL32.095 F2-20	Chile16_31-6	10	44	20	25	65	35.3571	61
5798	1	H100_DRIL32.095	H100_DRIL32.095 F2-23	Chile16_31-9	10	43	15	25	60	32.8571	64
5799	1	H100_DRIL32.095	H100_DRIL32.095 F2-6	Chile16_33-6	10	42	20	30	65	37.8571	61
5800	1	H100_DRIL32.095	H100_DRIL32.095 F2-37	Chile16_32-12	10	41	20	25	65	35.3571	62
5801	1	H100_DRIL32.095	H100_DRIL32.095 F2-57	Chile16_34-15	10	40	20	25	65	35.3571	64
5802	1	H100_DRIL32.095	H100_DRIL32.095 F2-78	Chile16_29-5	10	39	20	25	65	35.3571	62
5803	1	H100_DRIL32.095	H100_DRIL32.095 F2-40	Chile16_32-15	10	38	20	25	60	33.9286	62
5804	1	H100_DRIL32.095	H100_DRIL32.095 F2-59	Chile16_34-17	10	37	20	25	65	35.3571	62
5805	1	H100_DRIL32.095	H100_DRIL32.095 F2-65	Chile16_30-5	10	36	20	30	65	37.8571	61
5806	1	H100_DRIL32.095	H100_DRIL32.095 F2-62	Chile16_30-2	10	35	20	25	60	33.9286	62
5807	1	H100_DRIL32.095	H100_DRIL32.095 F2-8	Chile16_33-8	10	34	15	25	55	31.4286	65
5808	1	H100_DRIL32.095	H100_DRIL32.095 F2-77	Chile16_29-4	10	33	20	30	65	37.8571	61
5809	1	H100_DRIL32.095	H100_DRIL32.095 F2-27	Chile16_32-2	10	32	20	25	60	33.9286	64
5810	1	H100_DRIL32.095	H100_DRIL32.095 F2-60	Chile16_34-18	11	32	20	30	65	37.8571	62
5811	1	H100_DRIL32.095	H100_DRIL32.095 F2-26	Chile16_32-1	11	33	20	30	65	37.8571	64
5812	1	H100_DRIL32.095	H100_DRIL32.095 F2-4	Chile16_33-4	11	34	20	30	65	37.8571	62
5813	1	H100_DRIL32.095	H100_DRIL32.095 F2-45	Chile16_34-3	11	35	20	30	65	37.8571	62
5814	1	H100_DRIL32.095	H100_DRIL32.095 F2-41	Chile16_32-16	11	36	20	30	65	37.8571	65
5815	1	H100_DRIL32.095	H100_DRIL32.095 F2-32	Chile16_32-7	11	37	20	30	65	37.8571	62
5816	1	H100_DRIL32.095	H100_DRIL32.095 F2-21	Chile16_31-7	11	38	20	30	65	37.8571	60
5817	1	H100_DRIL32.095	H100_DRIL32.095 F2-76	Chile16_29-3	11	39	20	30	65	37.8571	61
5818	1	H100_DRIL32.095	H100_DRIL32.095 F2-33	Chile16_32-8	11	40	20	30	60	36.4286	61
5819	1	H100_DRIL32.095	H100_DRIL32.095 F2-70	Chile16_30-10	11	41	5	30	65	34.6429	64
5820	1	H100_DRIL32.095	H100_DRIL32.095 F2-69	Chile16_30-9	11	42	5	30	60	33.2143	62
5821	1	H100_DRIL32.095	H100_DRIL32.095 F2-35	Chile16_32-10	11	43	5	30	60	33.2143	65
5822	1	H100_DRIL32.095	H100_DRIL32.095 F2-72	Chile16_30-12	11	44	20	30	65	37.8571	64
5823	1	H100_DRIL32.095	H100_DRIL32.095 F2-52	Chile16_34-10	11	45	20	30	65	37.8571	62
5824	1	H100_DRIL32.095	H100_DRIL32.095 F2-9	Chile16_33-9	11	46	20	30	65	37.8571	62
5825	1	H100_DRIL32.095	H100_DRIL32.095 F2-3	Chile16_33-3	11	47	20	30	65	37.8571	61
5826	1			BBP	11	48				0	#NUM!
5827	1	H100	H100	CL14 2141 blk	11	49	20	25	60	33.9286	63
5828	1	H100_DRIL62.156	H100_DRIL62.156 F2-3	Chile16_100-3	11	50	20	30	60	36.4286	62
5829	1	H100_DRIL62.156	H100_DRIL62.156 F2-14	Chile16_101-4	11	51	15	30	60	35.3571	65
5830	1	H100_DRIL62.156	H100_DRIL62.156 F2-7	Chile16_100-7	11	52	20	30	65	37.8571	64
5831	1	H100_DRIL62.156	H100_DRIL62.156 F2-36	Chile16_103-4	11	53	20	30	65	37.8571	64
5832	1	H100_DRIL62.156	H100_DRIL62.156 F2-42	Chile16_103-10	11	54	20	30	65	37.8571	65
5833	1	H100_DRIL62.156	H100_DRIL62.156 F2-60	Chile16_105-9	11	55	25	30	65	38.9286	62
5834	1	H100_DRIL62.156	H100_DRIL62.156 F2-53	Chile16_105-2	11	56	20	30	65	37.8571	63
5835	1	H100	H100	CL14 2141 blk	11	57	20	30	50	33.5714	61
5836	1	H100_DRIL62.156	H100_DRIL62.156 F2-12	Chile16_101-2	11	58	25	30	60	37.5	62
5837	1	H100_DRIL62.156	H100_DRIL62.156 F2-32	Chile16_102-13	12	58	20	30	65	37.8571	61
5838	1	H100_DRIL62.156	H100_DRIL62.156 F2-33	Chile16_103-1	12	57	20	25	60	33.9286	65
5839	1	H100	H100	CL14 2141 blk	12	56	20	30	65	37.8571	61
5840	1	H100_DRIL62.156	H100_DRIL62.156 F2-31	Chile16_102-12	12	55	20	30	65	37.8571	61
5841	1	H100_DRIL62.156	H100_DRIL62.156 F2-51	Chile16_104-9	12	54	20	30	65	37.8571	62
5842	1	H100_DRIL62.156	H100_DRIL62.156 F2-4	Chile16_100-4	12	53	20	30	65	37.8571	64
5843	1	H100_DRIL62.156	H100_DRIL62.156 F2-26	Chile16_102-7	12	52	20	30	60	36.4286	62
5844	1	H100_DRIL62.156	H100_DRIL62.156 F2-6	Chile16_100-6	12	51	20	30	65	37.8571	64
5845	1	H100_DRIL62.156	H100_DRIL62.156 F2-17	Chile16_101-7	12	50	20	30	65	37.8571	62
5846	1	H100_DRIL62.156	H100_DRIL62.156 F2-49	Chile16_104-7	12	49	20	30	65	37.8571	64
5847	1	H100_DRIL62.156	H100_DRIL62.156 F2-48	Chile16_104-6	12	48	15	25	65	34.2857	71
5848	1	H100_DRIL62.156	H100_DRIL62.156 F2-25	Chile16_102-6	12	47	15	25	55	31.4286	70
5849	1	H100_DRIL62.156	H100_DRIL62.156 F2-38	Chile16_103-6	12	46	20	30	65	37.8571	64
5850	1	H100_DRIL62.156	H100_DRIL62.156 F2-54	Chile16_105-3	12	45	15	25	65	34.2857	62
5851	1	H100_DRIL62.156	H100_DRIL62.156 F2-2	Chile16_100-2	12	44	15	30	65	36.7857	64
5852	1	H100_DRIL62.156	H100_DRIL62.156 F2-52	Chile16_105-1	12	43	20	30	65	37.8571	61
5853	1	H100_DRIL62.156	H100_DRIL62.156 F2-8	Chile16_100-8	12	42	20	30	65	37.8571	61
5854	1	H100_DRIL62.156	H100_DRIL62.156 F2-10	Chile16_100-10	12	41	15	30	65	36.7857	61
5855	1	H100_DRIL62.156	H100_DRIL62.156 F2-61	Chile16_105-10	12	40	15	30	65	36.7857	65
5856	1	H100_DRIL62.156	H100_DRIL62.156 F2-23	Chile16_102-4	12	39	15	30	65	36.7857	66
5857	1	H100_DRIL62.156	H100_DRIL62.156 F2-15	Chile16_101-5	12	38	20	30	65	37.8571	61
5858	1	H100_DRIL62.156	H100_DRIL62.156 F2-21	Chile16_102-2	12	37	20	30	65	37.8571	61
5859	1	H100_DRIL62.156	H100_DRIL62.156 F2-16	Chile16_101-6	12	36	15	30	65	36.7857	63
5860	1	H100_DRIL62.156	H100_DRIL62.156 F2-63	Chile16_105-12	12	35	15	30	65	36.7857	64
5861	1	H100_DRIL62.156	H100_DRIL62.156 F2-19	Chile16_101-9	12	34	20	30	65	37.8571	62
5862	1	H100_DRIL62.156	H100_DRIL62.156 F2-39	Chile16_103-7	12	33	20	30	65	37.8571	62
5863	1	H100_DRIL62.156	H100_DRIL62.156 F2-46	Chile16_104-4	12	32	20	30	65	37.8571	62
5864	1	H100_DRIL62.156	H100_DRIL62.156 F2-18	Chile16_101-8	13	32	15	30	65	36.7857	63
5865	1	H100_DRIL62.156	H100_DRIL62.156 F2-55	Chile16_105-4	13	33	20	30	65	37.8571	62
5866	1	H100_DRIL62.156	H100_DRIL62.156 F2-20	Chile16_102-1	13	34	20	30	65	37.8571	64
5867	1	H100_DRIL62.156	H100_DRIL62.156 F2-47	Chile16_104-5	13	35	15	25	65	34.2857	64
5868	1	H100_DRIL62.156	H100_DRIL62.156 F2-11	Chile16_101-1	13	36	20	30	65	37.8571	61
5869	1	H100_DRIL62.156	H100_DRIL62.156 F2-44	Chile16_104-2	13	37	20	30	50	33.5714	65
5870	1	H100_DRIL62.156	H100_DRIL62.156 F2-58	Chile16_105-7	13	38	20	30	70	39.2857	61
5871	1	H100	H100	CL14 2141 blk	13	39	20	30	70	39.2857	61
5872	1	H100_DRIL62.156	H100_DRIL62.156 F2-30	Chile16_102-11	13	40	20	30	65	37.8571	66
5873	1	H100_DRIL62.156	H100_DRIL62.156 F2-50	Chile16_104-8	13	41	20	30	65	37.8571	65
5874	1	H100_DRIL62.156	H100_DRIL62.156 F2-41	Chile16_103-9	13	42	20	30	60	36.4286	63
5875	1	H100	H100	CL14 2141 blk	13	43	25	35	70	42.8571	61
5876	1	H100_DRIL62.156	H100_DRIL62.156 F2-59	Chile16_105-8	13	44	20	30	60	36.4286	64
5877	1	H100_DRIL62.156	H100_DRIL62.156 F2-13	Chile16_101-3	13	45	15	25	60	32.8571	67
5878	1	DRIL62.156	DRIL62.156	CL16 1435-1	13	46	10	20	60	29.2857	72
5879	1	H100_DRIL62.156	H100_DRIL62.156 F2-40	Chile16_103-8	13	47	15	25	60	32.8571	64
5880	1	H100_DRIL62.156	H100_DRIL62.156 F2-9	Chile16_100-9	13	48	20	25	65	35.3571	66
5881	1	H100_DRIL62.156	H100_DRIL62.156 F2-27	Chile16_102-8	13	49	15	30	65	36.7857	62
5882	1	H100_DRIL62.156	H100_DRIL62.156 F2-22	Chile16_102-3	13	50	20	30	65	37.8571	62
5883	1	H100_DRIL62.156	H100_DRIL62.156 F2-43	Chile16_104-1	13	51	15	25	60	32.8571	67
5884	1	H100_DRIL62.156	H100_DRIL62.156 F2-62	Chile16_105-11	13	52	20	25	65	35.3571	64
5885	1	H100_DRIL62.156	H100_DRIL62.156 F2-35	Chile16_103-3	13	53	20	30	65	37.8571	64
5886	1	H100_DRIL62.156	H100_DRIL62.156 F2-5	Chile16_100-5	13	54	20	35	70	41.7857	63
5887	1	H100_DRIL62.156	H100_DRIL62.156 F2-1	Chile16_100-1	13	55	20	30	65	37.8571	62
5888	1	H100_DRIL62.156	H100_DRIL62.156 F2-24	Chile16_102-5	13	56	20	30	65	37.8571	64
5889	1	H100_DRIL62.156	H100_DRIL62.156 F2-45	Chile16_104-3	13	57	20	30	65	37.8571	65
5890	1	H100_DRIL62.156	H100_DRIL62.156 F2-28	Chile16_102-9	13	58	20	25	65	35.3571	63
5891	1	H100_DRIL62.156	H100_DRIL62.156 F2-56	Chile16_105-5	14	58	20	30	60	36.4286	62
5892	1	H100_DRIL62.156	H100_DRIL62.156 F2-34	Chile16_103-2	14	57	20	30	65	37.8571	62
5893	1			BBP	14	56				0	#NUM!
5894	1	H100_DRIL52.268	H100_DRIL52.268 F2-41	Chile16_73-1	14	55	20	30	70	39.2857	64
5895	1	H100_DRIL52.268	H100_DRIL52.268 F2-38	Chile16_76-15	14	54	20	30	65	37.8571	62
5896	1	H100_DRIL52.268	H100_DRIL52.268 F2-75	Chile16_72-7	14	53	20	25	65	35.3571	62
5897	1	H100_DRIL52.268	H100_DRIL52.268 F2-73	Chile16_72-5	14	52	20	30	65	37.8571	60
5898	1	H100_DRIL52.268	H100_DRIL52.268 F2-53	Chile16_73-13	14	51	20	30	70	39.2857	62
5899	1	H100_DRIL52.268	H100_DRIL52.268 F2-46	Chile16_73-6	14	50	20	30	65	37.8571	60
5900	1	H100_DRIL52.268	H100_DRIL52.268 F2-67	Chile16_71-11	14	49	20	30	65	37.8571	65
5901	1	H100_DRIL52.268	H100_DRIL52.268 F2-59	Chile16_71-3	14	48	15	20	60	30.3571	66
5902	1	H100	H100	CL14 2141 blk	14	47	25	35	70	42.8571	62
5903	1	H100_DRIL52.268	H100_DRIL52.268 F2-9	Chile16_75-9	14	46	20	30	65	37.8571	62
5904	1	H100	H100	CL14 2141 blk	14	45	20	30	65	37.8571	62
5905	1	H100_DRIL52.268	H100_DRIL52.268 F2-20	Chile16_74-10	14	44	20	30	65	37.8571	66
5906	1	H100_DRIL52.268	H100_DRIL52.268 F2-49	Chile16_73-9	14	43	20	30	65	37.8571	61
5907	1	H100_DRIL52.268	H100_DRIL52.268 F2-69	Chile16_72-1	14	42	20	30	70	39.2857	59
5908	1	H100_DRIL52.268	H100_DRIL52.268 F2-16	Chile16_74-6	14	41	20	30	70	39.2857	60
5909	1	H100_DRIL52.268	H100_DRIL52.268 F2-77	Chile16_72-9	14	40	20	30	70	39.2857	62
5910	1	H100_DRIL52.268	H100_DRIL52.268 F2-68	Chile16_71-12	14	39	20	30	70	39.2857	62
5911	1	H100_DRIL52.268	H100_DRIL52.268 F2-32	Chile16_76-9	14	38	20	30	65	37.8571	60
5912	1	H100_DRIL52.268	H100_DRIL52.268 F2-65	Chile16_71-9	14	37	20	30	65	37.8571	66
5913	1	H100_DRIL52.268	H100_DRIL52.268 F2-66	Chile16_71-10	14	36	20	30	65	37.8571	62
5914	1	H100_DRIL52.268	H100_DRIL52.268 F2-64	Chile16_71-8	14	35	25	35	70	42.8571	63
5915	1	H100_DRIL52.268	H100_DRIL52.268 F2-12	Chile16_74-2	14	34	20	30	65	37.8571	62
5916	1	H100_DRIL52.268	H100_DRIL52.268 F2-7	Chile16_75-7	14	33	20	30	60	36.4286	60
5917	1	H100_DRIL52.268	H100_DRIL52.268 F2-39	Chile16_76-16	14	32	20	30	60	36.4286	62
5918	1	H100_DRIL52.268	H100_DRIL52.268 F2-44	Chile16_73-4	15	32	20	30	65	37.8571	64
5919	1	H100_DRIL52.268	H100_DRIL52.268 F2-43	Chile16_73-3	15	33	20	30	65	37.8571	64
5920	1	H100_DRIL52.268	H100_DRIL52.268 F2-72	Chile16_72-4	15	34	20	35	70	41.7857	62
5921	1	H100_DRIL52.268	H100_DRIL52.268 F2-6	Chile16_75-6	15	35	20	30	65	37.8571	65
5922	1	H100_DRIL52.268	H100_DRIL52.268 F2-47	Chile16_73-7	15	36	15	30	65	36.7857	60
5923	1	H100_DRIL52.268	H100_DRIL52.268 F2-10	Chile16_75-10	15	37	20	30	65	37.8571	65
5924	1	H100_DRIL52.268	H100_DRIL52.268 F2-23	Chile16_74-13	15	38	35	30	70	42.5	64
5925	1	H100_DRIL52.268	H100_DRIL52.268 F2-70	Chile16_72-2	15	39	25	30	70	40.3571	60
5926	1	H100_DRIL52.268	H100_DRIL52.268 F2-58	Chile16_71-2	15	40	20	30	65	37.8571	62
5927	1	H100_DRIL52.268	H100_DRIL52.268 F2-31	Chile16_76-8	15	41	20	30	65	37.8571	64
5928	1	H100_DRIL52.268	H100_DRIL52.268 F2-1	Chile16_75-1	15	42	20	30	65	37.8571	62
5929	1	H100_DRIL52.268	H100_DRIL52.268 F2-25	Chile16_76-2	15	43	20	30	70	39.2857	60
5930	1	H100_DRIL52.268	H100_DRIL52.268 F2-57	Chile16_71-1	15	44	20	30	65	37.8571	62
5931	1	H100_DRIL52.268	H100_DRIL52.268 F2-63	Chile16_71-7	15	45	20	30	65	37.8571	65
5932	1	H100	H100	CL14 2141 blk	15	46	20	35	70	41.7857	62
5933	1	H100_DRIL52.268	H100_DRIL52.268 F2-26	Chile16_76-3	15	47	20	30	70	39.2857	62
5934	1	H100_DRIL52.268	H100_DRIL52.268 F2-17	Chile16_74-7	15	48	20	30	70	39.2857	70
5935	1	H100_DRIL52.268	H100_DRIL52.268 F2-62	Chile16_71-6	15	49	20	25	65	35.3571	62
5936	1	H100_DRIL52.268	H100_DRIL52.268 F2-55	Chile16_73-15	15	50	20	25	65	35.3571	62
5937	1	H100_DRIL52.268	H100_DRIL52.268 F2-35	Chile16_76-12	15	51	20	25	65	35.3571	62
5938	1	H100_DRIL52.268	H100_DRIL52.268 F2-5	Chile16_75-5	15	52	20	25	65	35.3571	64
5939	1	DRIL52.268	DRIL52.268	CL16 1417-1	15	53	15	15	50	25	66
5940	1	H100_DRIL52.268	H100_DRIL52.268 F2-21	Chile16_74-11	15	54	20	30	65	37.8571	61
5941	1	H100_DRIL52.268	H100_DRIL52.268 F2-42	Chile16_73-2	15	55	20	30	65	37.8571	61
5942	1	H100_DRIL52.268	H100_DRIL52.268 F2-3	Chile16_75-3	15	56	20	30	65	37.8571	66
5943	1	H100_DRIL52.268	H100_DRIL52.268 F2-22	Chile16_74-12	15	57	15	20	45	26.0714	65
5944	1	H100_DRIL52.268	H100_DRIL52.268 F2-18	Chile16_74-8	15	58	25	35	65	41.4286	59
5945	1	H100_DRIL52.268	H100_DRIL52.268 F2-30	Chile16_76-7	16	58	20	30	65	37.8571	60
5946	1	H100_DRIL52.268	H100_DRIL52.268 F2-71	Chile16_72-3	16	57	20	25	65	35.3571	60
5947	1			bbp	16	56				0	#NUM!
5948	1	H100_DRIL52.268	H100_DRIL52.268 F2-56	Chile16_73-16	16	55	20	30	65	37.8571	59
5949	1	H100	H100	CL14 2142-1	16	54	25	35	70	42.8571	60
5950	1	H100_DRIL52.268	H100_DRIL52.268 F2-40	Chile16_76-17	16	53	20	30	65	37.8571	62
5951	1	H100_DRIL52.268	H100_DRIL52.268 F2-11	Chile16_74-1	16	52	20	30	65	37.8571	62
5952	1	H100_DRIL52.268	H100_DRIL52.268 F2-76	Chile16_72-8	16	51	15	25	65	34.2857	65
5953	1	H100_DRIL52.268	H100_DRIL52.268 F2-8	Chile16_75-8	16	50	20	30	65	37.8571	59
5954	1	H100	H100	CL14 2142-1	16	49	20	30	65	37.8571	61
5955	1	H100_DRIL52.268	H100_DRIL52.268 F2-50	Chile16_73-10	16	48	20	25	65	35.3571	72
5956	1	H100_DRIL52.268	H100_DRIL52.268 F2-52	Chile16_73-12	16	47	20	30	65	37.8571	65
5957	1	H100_DRIL52.268	H100_DRIL52.268 F2-15	Chile16_74-5	16	46	20	30	65	37.8571	62
5958	1	H100_DRIL52.268	H100_DRIL52.268 F2-28	Chile16_76-5	16	45	20	30	70	39.2857	61
5959	1	H100_DRIL52.268	H100_DRIL52.268 F2-36	Chile16_76-13	16	44	20	30	65	37.8571	61
5960	1	H100_DRIL52.268	H100_DRIL52.268 F2-51	Chile16_73-11	16	43	20	30	65	37.8571	60
5961	1	H100_DRIL52.268	H100_DRIL52.268 F2-27	Chile16_76-4	16	42	20	30	65	37.8571	62
5962	1	H100_DRIL52.268	H100_DRIL52.268 F2-4	Chile16_75-4	16	41	20	30	65	37.8571	59
5963	1	H100_DRIL52.268	H100_DRIL52.268 F2-48	Chile16_73-8	16	40	20	30	65	37.8571	62
5964	1	H100_DRIL52.268	H100_DRIL52.268 F2-61	Chile16_71-5	16	39	20	30	65	37.8571	60
5965	1	H100_DRIL52.268	H100_DRIL52.268 F2-60	Chile16_71-4	16	38	15	25	60	32.8571	69
5966	1	H100_DRIL52.268	H100_DRIL52.268 F2-13	Chile16_74-3	16	37	20	25	60	33.9286	66
5967	1	H100_DRIL52.268	H100_DRIL52.268 F2-33	Chile16_76-10	16	36	20	30	65	37.8571	66
5968	1	H100_DRIL52.268	H100_DRIL52.268 F2-14	Chile16_74-4	16	35	20	30	60	36.4286	62
5969	1	H100_DRIL52.268	H100_DRIL52.268 F2-24	Chile16_76-1	16	34	20	30	65	37.8571	66
5970	1	H100_DRIL52.268	H100_DRIL52.268 F2-37	Chile16_76-14	16	33	15	25	60	32.8571	66
5971	1	H100_DRIL52.268	H100_DRIL52.268 F2-2	Chile16_75-2	16	32	20	25	60	33.9286	62
5972	1	H100_DRIL52.268	H100_DRIL52.268 F2-54	Chile16_73-14	17	32	20	30	60	36.4286	62
5973	1	H100_DRIL52.268	H100_DRIL52.268 F2-29	Chile16_76-6	17	33	20	30	60	36.4286	60
8001	2	H100_DRIL52.055	H100_DRIL52.055 F2-7	Chile16_53-7	17	8	5	15	20	13.75	61
8002	2	H100_DRIL52.055	H100_DRIL52.055 F2-34	Chile16_58-13	17	9	5	10	20	11.25	62
8003	2	H100_DRIL52.055	H100_DRIL52.055 F2-50	Chile16_57-8	17	10	5	10	20	11.25	63
8004	2	H100_DRIL52.055	H100_DRIL52.055 F2-11	BBP	17	11				0	#NUM!
8005	2	H100_DRIL52.055	H100_DRIL52.055 F2-17	Chile16_56-10	17	12	5	15	20	13.75	63
8006	2	H100_DRIL52.055	H100_DRIL52.055 F2-54	bbp	17	13				0	#NUM!
8007	2	H100	H100	CL14 2142-1	17	14	10	20	30	20	60
8008	2	H100_DRIL52.055	H100_DRIL52.055 F2-15	Chile16_56-8	17	15	10	20	30	20	61
8009	2	H100_DRIL52.055	H100_DRIL52.055 F2-28	Chile16_58-7	17	16	10	20	30	20	60
8010	2	H100_DRIL52.055	H100_DRIL52.055 F2-2	Chile16_53-2	17	17	5	15	30	16.25	67
8011	2	H100_DRIL52.055	H100_DRIL52.055 F2-65	Chile16_55-4	17	18	10	15	25	16.25	63
8012	2	H100_DRIL52.055	H100_DRIL52.055 F2-52	Chile16_57-10	17	19	15	20	30	21.25	64
8013	2	H100_DRIL52.055	H100_DRIL52.055 F2-51	Chile16_57-9	17	20	10	20	30	20	62
8014	2	H100_DRIL52.055	H100_DRIL52.055 F2-59	Chile16_57-17	17	21	10	20	30	20	64
8015	2	H100	H100	CL14 2142-1	17	22	15	20	30	21.25	65
8016	2	H100_DRIL52.055	H100_DRIL52.055 F2-61	Chile16_57-19	17	23	10	20	30	20	59
8017	2	H100_DRIL52.055	H100_DRIL52.055 F2-43	Chile16_57-1	17	24	10	20	30	20	62
8018	2	H100_DRIL52.055	H100_DRIL52.055 F2-40	Chile16_54-6	17	25	10	20	30	20	62
8019	2	H100_DRIL52.055	H100_DRIL52.055 F2-56	Chile16_57-14	17	26	10	20	25	18.75	61
8020	2	H100_DRIL52.055	H100_DRIL52.055 F2-24	Chile16_58-3	17	27	15	20	30	21.25	59
8021	2	H100_DRIL52.055	H100_DRIL52.055 F2-20	BBP	17	28				0	#NUM!
8022	2	H100_DRIL52.055	H100_DRIL52.055 F2-38	Chile16_54-4	18	28	10	15	30	17.5	63
8023	2	H100_DRIL52.055	H100_DRIL52.055 F2-57	Chile16_57-15	18	27	10	15	25	16.25	62
8024	2	H100_DRIL52.055	H100_DRIL52.055 F2-10	Chile16_56-3	18	26	15	20	30	21.25	63
8025	2	H100_DRIL52.055	H100_DRIL52.055 F2-32	Chile16_58-11	18	25	10	15	25	16.25	62
8026	2	H100_DRIL52.055	H100_DRIL52.055 F2-5	Chile16_53-5	18	24	10	15	25	16.25	63
8027	2	H100	H100	CL14 2142-1	18	23	15	25	30	23.75	61
8028	2	H100_DRIL52.055	H100_DRIL52.055 F2-42	Chile16_54-8	18	22	10	20	25	18.75	61
8029	2	H100_DRIL52.055	H100_DRIL52.055 F2-9	Chile16_56-2	18	21	10	15	25	16.25	65
8030	2	H100_DRIL52.055	H100_DRIL52.055 F2-60	Chile16_57-18	18	20	5	15	25	15	60
8031	2	H100_DRIL52.055	H100_DRIL52.055 F2-8	Chile16_56-1	18	19	10	20	25	18.75	65
8032	2	H100_DRIL52.055	H100_DRIL52.055 F2-64	Chile16_55-3	18	18	5	15	25	15	60
8033	2	H100_DRIL52.055	H100_DRIL52.055 F2-36	Chile16_54-2	18	17	5	10	cs	#VALUE!	64
8034	2	H100_DRIL52.055	H100_DRIL52.055 F2-41	Chile16_54-7	18	16	5	15	25	15	61
8035	2	H100_DRIL52.055	H100_DRIL52.055 F2-37	Chile16_54-3	18	15	5	15	25	15	66
8036	2	H100_DRIL52.055	H100_DRIL52.055 F2-23	Chile16_58-2	18	14	5	15	25	15	62
8037	2	H100_DRIL52.055	H100_DRIL52.055 F2-30	Chile16_58-9	18	13	10	20	30	20	63
8038	2	H100_DRIL52.055	H100_DRIL52.055 F2-26	Chile16_58-5	18	12	10	20	25	18.75	65
8039	2	H100_DRIL52.055	H100_DRIL52.055 F2-18	Chile16_56-11	18	11	5	20	30	18.75	60
8040	2	H100_DRIL52.055	H100_DRIL52.055 F2-67	Chile16_55-6	18	10	5	15	25	15	62
8041	2	H100_DRIL52.055	H100_DRIL52.055 F2-39	Chile16_54-5	18	9	10	15	25	16.25	61
8042	2	H100_DRIL52.055	H100_DRIL52.055 F2-16	Chile16_56-9	18	8	5	15	25	15	65
8043	2	H100_DRIL52.055	H100_DRIL52.055 F2-48	Chile16_57-6	18	7	10	15	25	16.25	62
8044	2	H100_DRIL52.055	H100_DRIL52.055 F2-3	Chile16_53-3	18	6	10	15	30	17.5	63
8045	2	DRIL52.055	DRIL52.055	CL16 1412-1	18	5	10	15	20	15	62
8046	2	H100_DRIL52.055	H100_DRIL52.055 F2-4	Chile16_53-4	18	4	5	15	25	15	60
8047	2	H100_DRIL52.055	H100_DRIL52.055 F2-29	Chile16_58-8	18	3	5	15	25	15	62
8048	2	H100_DRIL52.055	H100_DRIL52.055 F2-13	Chile16_56-6	18	2	5	15	25	15	63
8049	2	H100_DRIL52.055	H100_DRIL52.055 F2-25	Chile16_58-4	18	1	10	15	25	16.25	60
8050	2	BBP	BBP		19	1				0	#NUM!
8051	2	H100_DRIL52.055	H100_DRIL52.055 F2-66	Chile16_55-5	19	2	10	20	30	20	60
8052	2	H100_DRIL52.055	H100_DRIL52.055 F2-31	Chile16_58-10	19	3	10	20	30	20	62
8053	2	H100_DRIL52.055	H100_DRIL52.055 F2-58	Chile16_57-16	19	4	10	15	25	16.25	62
8054	2	H100_DRIL52.055	H100_DRIL52.055 F2-27	Chile16_58-6	19	5	15	20	30	21.25	65
8055	2	H100_DRIL52.055	H100_DRIL52.055 F2-62	Chile16_55-1	19	6	10	20	30	20	61
8056	2	H100_DRIL52.055	H100_DRIL52.055 F2-6	Chile16_53-6	19	7	10	15	30	17.5	60
8057	2	H100_DRIL52.055	H100_DRIL52.055 F2-63	Chile16_55-2	19	8	10	20	35	21.25	63
8058	2	H100	H100	CL14 2142-1	19	9	20	25	35	26.25	58
8059	2	H100_DRIL52.055	H100_DRIL52.055 F2-1	Chile16_53-1	19	10	10	20	30	20	62
8060	2	H100_DRIL52.055	H100_DRIL52.055 F2-21	Chile16_56-14	19	11	15	20	30	21.25	59
8061	2	H100_DRIL52.055	H100_DRIL52.055 F2-19	Chile16_56-12	19	12	10	15	30	17.5	61
8062	2	H100_DRIL52.055	H100_DRIL52.055 F2-49	Chile16_57-7	19	13	10	15	25	16.25	63
8063	2	H100_DRIL52.055	H100_DRIL52.055 F2-68	Chile16_55-7	19	14	15	20	30	21.25	62
8064	2	H100_DRIL52.055	H100_DRIL52.055 F2-33	Chile16_58-12	19	15	10	15	25	16.25	63
8065	2	H100_DRIL52.055	H100_DRIL52.055 F2-12	Chile16_56-5	19	16	10	15	25	16.25	63
8066	2	H100_DRIL52.055	H100_DRIL52.055 F2-45	Chile16_57-3	19	17	10	15	25	16.25	60
8067	2	H100_DRIL52.055	H100_DRIL52.055 F2-14	Chile16_56-7	19	18	10	20	30	20	63
8068	2	H100_DRIL52.055	H100_DRIL52.055 F2-47	Chile16_57-5	19	19	10	15	25	16.25	67
8069	2	H100_DRIL52.055	H100_DRIL52.055 F2-44	Chile16_57-2	19	20	10	20	30	20	61
8070	2	H100_DRIL52.055	H100_DRIL52.055 F2-46	Chile16_57-4	19	21	15	20	30	21.25	63
8071	2			BBP	19	22				0	#NUM!
8072	2	H100_DRIL62.078	H100_DRIL62.078 F2-21	Chile16_90-6	19	23	15	20	30	21.25	63
8073	2	H100_DRIL62.078	H100_DRIL62.078 F2-64	Chile16_91-7	19	24	15	20	30	21.25	60
8074	2	H100_DRIL62.078	H100_DRIL62.078 F2-38	Chile16_89-10	19	25	10	20	30	20	60
8075	2	H100_DRIL62.078	H100_DRIL62.078 F2-51	Chile16_93-5	19	26	15	20	30	21.25	63
8076	2	DRIL62.078	DRIL62.078	CL16 430-1	19	27	10	20	30	20	68
8077	2	H100_DRIL62.078	H100_DRIL62.078 F2-49	Chile16_93-3	19	28	10	15	30	17.5	62
8078	2	H100	H100	CL14 2142-1	20	28	15	20	35	22.5	60
8079	2	H100_DRIL62.078	H100_DRIL62.078 F2-73	Chile16_92-4	20	27	10	15	30	17.5	63
8080	2	H100_DRIL62.078	H100_DRIL62.078 F2-23	Chile16_90-8	20	26	10	15	30	17.5	60
8081	2	H100_DRIL62.078	H100_DRIL62.078 F2-29	Chile16_89-1	20	25	10	15	30	17.5	62
8082	2	H100_DRIL62.078	H100_DRIL62.078 F2-80	Chile16_92-11	20	24	15	20	30	21.25	60
8083	2	H100_DRIL62.078	H100_DRIL62.078 F2-33	Chile16_89-5	20	23	15	20	30	21.25	63
8084	2	H100_DRIL62.078	H100_DRIL62.078 F2-25	Chile16_90-10	20	22	15	25	35	25	62
8085	2	H100_DRIL62.078	H100_DRIL62.078 F2-81	Chile16_92-12	20	21	15	25	30	23.75	63
8086	2	H100_DRIL62.078	H100_DRIL62.078 F2-70	Chile16_92-1	20	20	10	20	30	20	61
8087	2	H100_DRIL62.078	H100_DRIL62.078 F2-78	Chile16_92-9	20	19	10	20	30	20	65
8088	2	H100_DRIL62.078	H100_DRIL62.078 F2-75	Chile16_92-6	20	18	10	20	30	20	63
8089	2	H100_DRIL62.078	H100_DRIL62.078 F2-50	Chile16_93-4	20	17	10	15	25	16.25	62
8090	2	H100_DRIL62.078	H100_DRIL62.078 F2-83	Chile16_92-14	20	16	10	15	25	16.25	63
8091	2	H100_DRIL62.078	H100_DRIL62.078 F2-2	Chile16_88-2	20	15	10	20	30	20	61
8092	2	H100_DRIL62.078	H100_DRIL62.078 F2-32	Chile16_89-4	20	14	10	15	25	16.25	63
8093	2	H100	H100	CL14 2142-1	20	13	10	20	35	21.25	63
8094	2	H100_DRIL62.078	H100_DRIL62.078 F2-18	Chile16_90-3	20	12	10	20	30	20	60
8095	2	H100_DRIL62.078	H100_DRIL62.078 F2-39	Chile16_89-11	20	11	15	20	30	21.25	63
8096	2	H100_DRIL62.078	H100_DRIL62.078 F2-53	Chile16_93-7	20	10	10	20	30	20	60
8097	2	H100_DRIL62.078	H100_DRIL62.078 F2-31	Chile16_89-3	20	9	10	20	30	20	61
8098	2	H100_DRIL62.078	H100_DRIL62.078 F2-65	Chile16_91-8	20	8	10	20	30	20	60
8099	2	H100_DRIL62.078	H100_DRIL62.078 F2-22	Chile16_90-7	20	7	15	20	30	21.25	60
8100	2	H100_DRIL62.078	H100_DRIL62.078 F2-20	Chile16_90-5	20	6	10	20	30	20	61
8101	2	H100_DRIL62.078	H100_DRIL62.078 F2-7	Chile16_88-7	20	5	15	20	30	21.25	63
8102	2	H100_DRIL62.078	H100_DRIL62.078 F2-6	Chile16_88-6	20	4	15	20	30	21.25	63
8103	2	H100_DRIL62.078	H100_DRIL62.078 F2-71	Chile16_92-2	20	3	10	20	30	20	63
8104	2	H100_DRIL62.078	H100_DRIL62.078 F2-57	Chile16_93-11	20	2	10	15	30	17.5	61
8105	2	H100	H100	CL14 2142-1	20	1	10	20	35	21.25	59
8106	2	H100_DRIL62.078	H100_DRIL62.078 F2-60	Chile16_91-3	21	1	15	20	30	21.25	58
8107	2	H100_DRIL62.078	H100_DRIL62.078 F2-76	Chile16_92-7	21	2	10	20	30	20	63
8108	2	H100_DRIL62.078	H100_DRIL62.078 F2-30	Chile16_89-2	21	3	10	20	30	20	63
8109	2	H100_DRIL62.078	H100_DRIL62.078 F2-72	Chile16_92-3	21	4	15	20	30	21.25	61
8110	2	H100_DRIL62.078	H100_DRIL62.078 F2-84	Chile16_92-15	21	5	15	20	30	21.25	61
8111	2	H100_DRIL62.078	H100_DRIL62.078 F2-11	Chile16_88-11	21	6	15	25	30	23.75	63
8112	2	H100_DRIL62.078	H100_DRIL62.078 F2-55	Chile16_93-9	21	7	15	25	30	23.75	60
8113	2	H100_DRIL62.078	H100_DRIL62.078 F2-63	Chile16_91-6	21	8	20	25	35	26.25	60
8114	2	H100_DRIL62.078	H100_DRIL62.078 F2-54	Chile16_93-8	21	9	10	20	30	20	61
8115	2	H100_DRIL62.078	H100_DRIL62.078 F2-27	Chile16_90-12	21	10	15	25	35	25	62
8116	2	H100_DRIL62.078	H100_DRIL62.078 F2-13	Chile16_88-13	21	11	10	20	30	20	59
8117	2			BBP	21	12				0	#NUM!
8118	2	H100_DRIL62.078	H100_DRIL62.078 F2-24	Chile16_90-9	21	13	10	20	25	18.75	61
8119	2	H100	H100	CL14 2142-1	21	14	15	20	30	21.25	61
8120	2	H100_DRIL62.078	H100_DRIL62.078 F2-14	Chile16_88-14	21	15	15	20	30	21.25	61
8121	2	H100_DRIL62.078	H100_DRIL62.078 F2-86	Chile16_92-17	21	16	15	20	30	21.25	62
8122	2	H100_DRIL62.078	H100_DRIL62.078 F2-48	Chile16_93-2	21	17	15	20	30	21.25	63
8123	2	H100_DRIL62.078	H100_DRIL62.078 F2-5	Chile16_88-5	21	18	15	25	30	23.75	61
8124	2	H100_DRIL62.078	H100_DRIL62.078 F2-4	Chile16_88-4	21	19	15	20	30	21.25	63
8125	2	H100_DRIL62.078	H100_DRIL62.078 F2-52	Chile16_93-6	21	20	15	20	30	21.25	62
8126	2	H100_DRIL62.078	H100_DRIL62.078 F2-59	Chile16_91-2	21	21	15	20	25	20	63
8127	2	H100_DRIL62.078	H100_DRIL62.078 F2-87	Chile16_92-18	21	22	15	25	30	23.75	68
8128	2	H100_DRIL62.078	H100_DRIL62.078 F2-26	Chile16_90-11	21	23	15	20	25	20	61
8129	2	H100_DRIL62.078	H100_DRIL62.078 F2-15	Chile16_88-15	21	24	15	20	25	20	60
8130	2	H100_DRIL62.078	H100_DRIL62.078 F2-47	Chile16_93-1	21	25	15	25	30	23.75	62
8131	2	H100_DRIL62.078	H100_DRIL62.078 F2-58	Chile16_91-1	21	26	15	20	25	20	60
8132	2	H100_DRIL62.078	H100_DRIL62.078 F2-41	Chile16_89-13	21	27	15	20	30	21.25	62
8133	2	H100_DRIL62.078	H100_DRIL62.078 F2-79	Chile16_92-10	21	28	15	20	25	20	62
8134	2	H100_DRIL62.078	H100_DRIL62.078 F2-69	Chile16_91-12	22	28	15	20	30	21.25	63
8135	2	H100_DRIL62.078	H100_DRIL62.078 F2-34	Chile16_89-6	22	27	15	20	30	21.25	61
8136	2	H100_DRIL62.078	H100_DRIL62.078 F2-40	Chile16_89-12	22	26	15	20	30	21.25	62
8137	2	H100_DRIL62.078	H100_DRIL62.078 F2-42	Chile16_89-14	22	25	15	20	30	21.25	61
8138	2	H100_DRIL62.078	H100_DRIL62.078 F2-74	Chile16_92-5	22	24	15	25	35	25	62
8139	2	H100_DRIL62.078	H100_DRIL62.078 F2-67	Chile16_91-10	22	23	15	25	35	25	60
8140	2	H100_DRIL62.078	H100_DRIL62.078 F2-56	Chile16_93-10	22	22	15	25	35	25	65
8141	2	H100_DRIL62.078	H100_DRIL62.078 F2-37	Chile16_89-9	22	21	15	25	35	25	60
8142	2	H100_DRIL62.078	H100_DRIL62.078 F2-62	Chile16_91-5	22	20	15	25	30	23.75	65
8143	2	H100_DRIL62.078	H100_DRIL62.078 F2-35	Chile16_89-7	22	19	15	25	35	25	62
8144	2	H100	H100	CL14 2142-1	22	18	15	25	35	25	60
8145	2	H100_DRIL62.078	H100_DRIL62.078 F2-12	Chile16_88-12	22	17	15	20	30	21.25	65
8146	2	H100_DRIL62.078	H100_DRIL62.078 F2-9	Chile16_88-9	22	16	10	20	30	20	62
8147	2	H100_DRIL62.078	H100_DRIL62.078 F2-10	Chile16_88-10	22	15	15	25	35	25	60
8148	2	H100_DRIL62.078	H100_DRIL62.078 F2-8	Chile16_88-8	22	14	15	25	30	23.75	61
8149	2	H100_DRIL62.078	H100_DRIL62.078 F2-16	Chile16_90-1	22	13	15	20	30	21.25	61
8150	2	H100_DRIL62.078	H100_DRIL62.078 F2-17	Chile16_90-2	22	12	15	25	35	25	61
8151	2	H100_DRIL62.078	H100_DRIL62.078 F2-61	Chile16_91-4	22	11	10	20	30	20	61
8152	2	H100_DRIL62.078	H100_DRIL62.078 F2-36	Chile16_89-8	22	10	15	20	30	21.25	63
8153	2	H100_DRIL62.078	H100_DRIL62.078 F2-82	Chile16_92-13	22	9	15	25	35	25	61
8154	2			BBP	22	8				0	#NUM!
8155	2	H100	H100	CL14 2142-1	22	7	20	30	40	30	58
8156	2	H100	H100	CL14 2142-1	22	6	20	30	40	30	60
8157	2	H100_DRIL32.090	H100_DRIL32.090 F2-31	Chile16_25-1	22	5	15	25	35	25	58
8158	2	H100_DRIL32.090	H100_DRIL32.090 F2-3	Chile16_24-3	22	4	10	15	35	18.75	61
8159	2	H100	H100	CL14 2142-1	22	3	20	25	40	27.5	59
8160	2	H100_DRIL32.090	H100_DRIL32.090 F2-30	Chile16_26-16	22	2	15	20	30	21.25	58
8161	2	H100_DRIL32.090	H100_DRIL32.090 F2-60	Chile16_23-2	22	1	15	20	25	20	63
8162	2	H100_DRIL32.090	H100_DRIL32.090 F2-59	Chile16_23-1	23	1	15	20	25	20	63
8163	2	H100_DRIL32.090	H100_DRIL32.090 F2-56	Chile16_28-5	23	2	15	25	30	23.75	63
8164	2	H100_DRIL32.090	H100_DRIL32.090 F2-6	Chile16_24-6	23	3	15	25	30	23.75	63
8165	2	H100_DRIL32.090	H100_DRIL32.090 F2-40	Chile16_25-10	23	4	15	20	30	21.25	62
8166	2	H100_DRIL32.090	H100_DRIL32.090 F2-2	Chile16_24-2	23	5	15	20	30	21.25	59
8167	2	H100_DRIL32.090	H100_DRIL32.090 F2-32	Chile16_25-2	23	6	15	25	30	23.75	63
8168	2	H100_DRIL32.090	H100_DRIL32.090 F2-67	Chile16_23-9	23	7	15	25	30	23.75	61
8169	2	H100_DRIL32.090	H100_DRIL32.090 F2-8	Chile16_24-8	23	8	15	20	30	21.25	63
8170	2	H100_DRIL32.090	H100_DRIL32.090 F2-45	Chile16_27-5	23	9	15	25	30	23.75	63
8171	2	H100_DRIL32.090	H100_DRIL32.090 F2-68	Chile16_23-10	23	10	15	25	30	23.75	63
8172	2	H100_DRIL32.090	H100_DRIL32.090 F2-17	Chile16_26-3	23	11	15	25	30	23.75	59
8173	2	H100_DRIL32.090	H100_DRIL32.090 F2-15	Chile16_26-1	23	12	15	25	30	23.75	65
8174	2	H100_DRIL32.090	H100_DRIL32.090 F2-49	Chile16_27-9	23	13	10	20	25	18.75	65
8175	2	H100_DRIL32.090	H100_DRIL32.090 F2-24	Chile16_26-10	23	14	15	25	30	23.75	61
8176	2	H100_DRIL32.090	H100_DRIL32.090 F2-22	Chile16_26-8	23	15	15	25	30	23.75	63
8177	2	H100_DRIL32.090	H100_DRIL32.090 F2-34	Chile16_25-4	23	16	15	25	30	23.75	62
8178	2	H100_DRIL32.090	H100_DRIL32.090 F2-19	Chile16_26-5	23	17	10	20	30	20	62
8179	2	H100_DRIL32.090	H100_DRIL32.090 F2-21	Chile16_26-7	23	18	15	25	30	23.75	65
8180	2	H100_DRIL32.090	H100_DRIL32.090 F2-70	Chile16_23-12	23	19	15	25	35	25	62
8181	2	H100_DRIL32.090	H100_DRIL32.090 F2-18	Chile16_26-4	23	20	15	25	35	25	61
8182	2	H100_DRIL32.090	H100_DRIL32.090 F2-4	Chile16_24-4	23	21	15	25	30	23.75	61
8183	2	H100_DRIL32.090	H100_DRIL32.090 F2-7	BBP	23	22				0	#NUM!
8184	2	H100_DRIL32.090	H100_DRIL32.090 F2-58	Chile16_28-7	23	23	15	20	30	21.25	63
8185	2	H100_DRIL32.090	H100_DRIL32.090 F2-37	Chile16_25-7	23	24	15	20	30	21.25	65
8186	2	H100_DRIL32.090	H100_DRIL32.090 F2-27	Chile16_26-13	23	25	15	25	35	25	61
8187	2	H100_DRIL32.090	H100_DRIL32.090 F2-61	Chile16_23-3	23	26	15	25	35	25	60
8188	2	H100_DRIL32.090	H100_DRIL32.090 F2-10	Chile16_24-10	23	27	15	25	35	25	59
8189	2	H100_DRIL32.090	H100_DRIL32.090 F2-55	Chile16_28-4	23	28	15	25	35	25	62
8190	2	H100_DRIL32.090	H100_DRIL32.090 F2-29	Chile16_26-15	24	28	15	25	35	25	62
8191	2	H100_DRIL32.090	H100_DRIL32.090 F2-38	Chile16_25-8	24	27	15	20	30	21.25	63
8192	2	H100_DRIL32.090	H100_DRIL32.090 F2-47	Chile16_27-7	24	26	10	20	30	20	63
8193	2	H100	H100	CL14 2142-1	24	25	15	30	40	28.75	59
8194	2	H100_DRIL32.090	H100_DRIL32.090 F2-54	Chile16_28-3	24	24	15	25	35	25	59
8195	2	H100_DRIL32.090	H100_DRIL32.090 F2-65	Chile16_23-7	24	23	10	25	35	23.75	62
8196	2	H100_DRIL32.090	H100_DRIL32.090 F2-42	Chile16_27-2	24	22	15	25	35	25	61
8197	2	H100_DRIL32.090	H100_DRIL32.090 F2-11	Chile16_24-11	24	21	15	25	35	25	62
8198	2	H100_DRIL32.090	H100_DRIL32.090 F2-26	Chile16_26-12	24	20	15	25	35	25	63
8199	2	H100_DRIL32.090	H100_DRIL32.090 F2-13	Chile16_24-13	24	19	15	25	35	25	61
8200	2	H100	H100	CL14 2142-1	24	18	15	25	35	25	61
8201	2	H100_DRIL32.090	H100_DRIL32.090 F2-63	Chile16_23-5	24	17	15	25	35	25	59
8202	2	H100_DRIL32.090	H100_DRIL32.090 F2-53	Chile16_28-2	24	16	10	15	20	15	55
8203	2	H100_DRIL32.090	H100_DRIL32.090 F2-48	Chile16_27-8	24	15	10	15	25	16.25	63
8204	2	H100_DRIL32.090	H100_DRIL32.090 F2-51	Chile16_27-11	24	14	10	20	30	20	62
8205	2	H100_DRIL32.090	H100_DRIL32.090 F2-44	Chile16_27-4	24	13	10	25	35	23.75	61
8206	2	H100_DRIL32.090	H100_DRIL32.090 F2-57	Chile16_28-6	24	12	15	25	35	25	62
8207	2	H100_DRIL32.090	H100_DRIL32.090 F2-69	Chile16_23-11	24	11	15	25	35	25	63
8208	2	H100_DRIL32.090	H100_DRIL32.090 F2-5	Chile16_24-5	24	10	10	20	30	20	62
8209	2	H100_DRIL32.090	H100_DRIL32.090 F2-28	Chile16_26-14	24	9	10	20	30	20	62
8210	2	H100_DRIL32.090	H100_DRIL32.090 F2-9	Chile16_24-9	24	8	15	25	35	25	61
8211	2	H100_DRIL32.090	H100_DRIL32.090 F2-43	Chile16_27-3	24	7	15	25	35	25	60
8212	2	H100_DRIL32.090	H100_DRIL32.090 F2-14	Chile16_24-14	24	6	15	25	35	25	62
8213	2	DRIL32.090	DRIL32.090	CL16 175-1	24	5	15	20	25	20	62
8214	2	H100_DRIL32.090	H100_DRIL32.090 F2-41	Chile16_27-1	24	4	15	25	30	23.75	62
8215	2	H100_DRIL32.090	H100_DRIL32.090 F2-33	Chile16_25-3	24	3	15	25	30	23.75	63
8216	2	H100_DRIL32.090	H100_DRIL32.090 F2-36	BBP	24	2				0	#NUM!
8217	2	H100_DRIL32.090	H100_DRIL32.090 F2-1	Chile16_24-1	24	1	15	25	35	25	60
8218	2	H100_DRIL32.090	H100_DRIL32.090 F2-50	Chile16_27-10	25	1	10	20	30	20	66
8219	2	H100_DRIL32.090	H100_DRIL32.090 F2-62	Chile16_23-4	25	2	15	25	35	25	59
8220	2	H100_DRIL32.090	H100_DRIL32.090 F2-23	Chile16_26-9	25	3	15	25	35	25	56
8221	2	H100_DRIL32.090	H100_DRIL32.090 F2-16	Chile16_26-2	25	4	15	25	35	25	61
8222	2	H100_DRIL32.090	H100_DRIL32.090 F2-25	Chile16_26-11	25	5	15	25	35	25	63
8223	2	H100_DRIL32.090	H100_DRIL32.090 F2-64	Chile16_23-6	25	6	15	20	30	21.25	61
8224	2	H100_DRIL32.090	H100_DRIL32.090 F2-12	Chile16_24-12	25	7	10	20	30	20	65
8225	2			BBP	25	8				0	#NUM!
8226	2	H100_DRIL72.061	H100_DRIL72.061 F2-56	BBP	25	9				0	#NUM!
8227	2	H100_DRIL72.061	H100_DRIL72.061 F2-37	Chile16_115-2	25	10	10	20	35	21.25	60
8228	2	H100_DRIL72.061	H100_DRIL72.061 F2-5	Chile16_114-5	25	11	10	20	35	21.25	61
8229	2	H100_DRIL72.061	H100_DRIL72.061 F2-2	Chile16_114-2	25	12	10	20	35	21.25	63
8230	2	H100	H100	CL14 2142-1	25	13	20	30	40	30	60
8231	2	H100_DRIL72.061	H100_DRIL72.061 F2-1	Chile16_114-1	25	14	15	20	35	22.5	61
8232	2	H100_DRIL72.061	H100_DRIL72.061 F2-63	Chile16_116-10	25	15	15	20	35	22.5	61
8233	2	H100_DRIL72.061	H100_DRIL72.061 F2-7	Chile16_114-7	25	16	10	20	35	21.25	62
8234	2	H100_DRIL72.061	H100_DRIL72.061 F2-46	Chile16_115-11	25	17	10	25	35	23.75	61
8235	2	H100_DRIL72.061	H100_DRIL72.061 F2-49	Chile16_115-14	25	18	10	15	30	17.5	64
8236	2	H100_DRIL72.061	H100_DRIL72.061 F2-57	Chile16_116-4	25	19	15	20	35	22.5	61
8237	2	H100	H100	CL14 2142-1	25	20	15	25	40	26.25	59
8238	2	H100_DRIL72.061	H100_DRIL72.061 F2-24	Chile16_113-1	25	21	15	20	30	21.25	60
8239	2	H100_DRIL72.061	H100_DRIL72.061 F2-41	Chile16_115-6	25	22	10	20	35	21.25	58
8240	2	H100_DRIL72.061	H100_DRIL72.061 F2-22	Chile16_112-11	25	23	15	25	35	25	60
8241	2	H100_DRIL72.061	H100_DRIL72.061 F2-32	Chile16_113-9	25	24	15	25	35	25	59
8242	2	H100_DRIL72.061	H100_DRIL72.061 F2-35	Chile16_113-12	25	25	15	5	35	15	65
8243	2	H100_DRIL72.061	H100_DRIL72.061 F2-73	Chile16_117-6	25	26	15	20	35	22.5	61
8244	2	H100_DRIL72.061	H100_DRIL72.061 F2-43	Chile16_115-8	25	27	15	20	35	22.5	59
8245	2	H100_DRIL72.061	H100_DRIL72.061 F2-53	Chile16_115-18	25	28	15	20	35	22.5	63
8246	2	H100_DRIL72.061	H100_DRIL72.061 F2-58	Chile16_116-5	26	28	15	20	35	22.5	60
8247	2	H100_DRIL72.061	H100_DRIL72.061 F2-36	Chile16_115-1	26	27	10	20	30	20	61
8248	2	H100_DRIL72.061	H100_DRIL72.061 F2-34	BBP	26	26				0	#NUM!
8249	2	H100_DRIL72.061	H100_DRIL72.061 F2-70	Chile16_117-3	26	25	15	25	30	23.75	65
8250	2	H100_DRIL72.061	H100_DRIL72.061 F2-52	Chile16_115-17	26	24	10	20	30	20	60
8251	2	H100_DRIL72.061	H100_DRIL72.061 F2-26	Chile16_113-3	26	23	15	20	30	21.25	60
8252	2	H100_DRIL72.061	H100_DRIL72.061 F2-28	Chile16_113-5	26	22	10	20	30	20	62
8253	2	H100_DRIL72.061	H100_DRIL72.061 F2-48	Chile16_115-13	26	21	10	20	35	21.25	63
8254	2	H100_DRIL72.061	H100_DRIL72.061 F2-12	Chile16_112-1	26	20	10	20	35	21.25	62
8255	2	H100_DRIL72.061	H100_DRIL72.061 F2-62	Chile16_116-9	26	19	10	20	30	20	62
8256	2	H100_DRIL72.061	H100_DRIL72.061 F2-30	Chile16_113-7	26	18	10	20	30	20	63
8257	2	H100_DRIL72.061	H100_DRIL72.061 F2-71	Chile16_117-4	26	17	10	20	30	20	60
8258	2	H100_DRIL72.061	H100_DRIL72.061 F2-4	Chile16_114-4	26	16	10	20	30	20	62
8259	2	H100_DRIL72.061	H100_DRIL72.061 F2-64	Chile16_116-11	26	15	10	20	30	20	60
8260	2	H100_DRIL72.061	H100_DRIL72.061 F2-14	Chile16_112-3	26	14	10	20	30	20	63
8261	2	H100_DRIL72.061	H100_DRIL72.061 F2-23	Chile16_112-12	26	13	10	20	30	20	61
8262	2	H100_DRIL72.061	H100_DRIL72.061 F2-72	Chile16_117-5	26	12	10	20	30	20	64
8263	2	H100	H100	CL14 2142-1	26	11	15	25	40	26.25	59
8264	2	H100_DRIL72.061	H100_DRIL72.061 F2-78	Chile16_117-11	26	10	10	20	cs	#VALUE!	61
8265	2	H100_DRIL72.061	H100_DRIL72.061 F2-21	Chile16_112-10	26	9	10	20	30	20	61
8266	2	H100_DRIL72.061	H100_DRIL72.061 F2-25	BBP	26	8				0	#NUM!
8267	2	H100_DRIL72.061	H100_DRIL72.061 F2-61	Chile16_116-8	26	7	10	20	30	20	61
8268	2	H100_DRIL72.061	H100_DRIL72.061 F2-17	Chile16_112-6	26	6	10	20	30	20	62
8269	2	DRIL72.061	DRIL72.061	CL16 669-1	26	5	10	20	25	18.75	62
8270	2	H100_DRIL72.061	H100_DRIL72.061 F2-39	Chile16_115-4	26	4	15	20	25	20	62
8271	2	H100_DRIL72.061	H100_DRIL72.061 F2-33	BBP	26	3				0	#NUM!
8272	2	H100_DRIL72.061	H100_DRIL72.061 F2-45	Chile16_115-10	26	2	15	25	30	23.75	60
8273	2	H100_DRIL72.061	H100_DRIL72.061 F2-76	Chile16_117-9	26	1	10	20	25	18.75	62
8274	2	H100_DRIL72.061	H100_DRIL72.061 F2-69	Chile16_117-2	27	1	10	20	25	18.75	60
8275	2	H100_DRIL72.061	H100_DRIL72.061 F2-77	Chile16_117-10	27	2	10	25	25	21.25	62
8276	2	H100_DRIL72.061	H100_DRIL72.061 F2-47	Chile16_115-12	27	3	20	25	35	26.25	61
8277	2	H100_DRIL72.061	H100_DRIL72.061 F2-29	Chile16_113-6	27	4	10	20	25	18.75	64
8278	2	H100_DRIL72.061	H100_DRIL72.061 F2-68	Chile16_117-1	27	5	10	20	25	18.75	64
8279	2	H100_DRIL72.061	H100_DRIL72.061 F2-51	Chile16_115-16	27	6	15	25	30	23.75	59
8280	2	H100_DRIL72.061	H100_DRIL72.061 F2-75	Chile16_117-8	27	7	10	20	25	18.75	61
8281	2	H100_DRIL72.061	H100_DRIL72.061 F2-11	Chile16_114-11	27	8	15	20	30	21.25	60
8282	2	H100_DRIL72.061	H100_DRIL72.061 F2-8	Chile16_114-8	27	9	10	20	25	18.75	63
8283	2	H100_DRIL72.061	H100_DRIL72.061 F2-31	Chile16_113-8	27	10	10	20	25	18.75	65
8284	2	H100	H100	CL14 2142-2	27	11	15	25	35	25	58
8285	2	H100_DRIL72.061	H100_DRIL72.061 F2-15	Chile16_112-4	27	12	10	20	25	18.75	63
8286	2	H100_DRIL72.061	H100_DRIL72.061 F2-6	Chile16_114-6	27	13	10	25	30	22.5	61
8287	2	H100_DRIL72.061	H100_DRIL72.061 F2-3	Chile16_114-3	27	14	15	25	30	23.75	60
8288	2	H100_DRIL72.061	H100_DRIL72.061 F2-50	Chile16_115-15	27	15	15	20	25	20	63
8289	2	H100_DRIL72.061	H100_DRIL72.061 F2-60	Chile16_116-7	27	16	15	25	30	23.75	60
8290	2	H100_DRIL72.061	H100_DRIL72.061 F2-66	Chile16_116-13	27	17	10	20	25	18.75	62
8291	2	H100_DRIL72.061	H100_DRIL72.061 F2-13	Chile16_112-2	27	18	10	20	25	18.75	65
8292	2	H100_DRIL72.061	H100_DRIL72.061 F2-38	Chile16_115-3	27	19	10	20	25	18.75	63
8293	2	H100_DRIL72.061	H100_DRIL72.061 F2-10	Chile16_114-10	27	20	15	25	30	23.75	63
8294	2	H100_DRIL72.061	H100_DRIL72.061 F2-59	Chile16_116-6	27	21	10	20	30	20	62
8295	2	H100_DRIL72.061	H100_DRIL72.061 F2-19	Chile16_112-8	27	22	bbp	bbp	bbp	#VALUE!	#NUM!
8296	2	H100_DRIL72.061	H100_DRIL72.061 F2-16	Chile16_112-5	27	23	5	20	30	18.75	62
8297	2	H100_DRIL72.061	H100_DRIL72.061 F2-67	Chile16_116-14	27	24	10	25	30	22.5	60
8298	2	H100_DRIL72.061	H100_DRIL72.061 F2-40	Chile16_115-5	27	25	15	25	30	23.75	61
8299	2	H100_DRIL72.061	H100_DRIL72.061 F2-44	Chile16_115-9	27	26	15	20	30	21.25	63
8300	2	H100_DRIL72.061	H100_DRIL72.061 F2-79	Chile16_117-12	27	27	15	20	30	21.25	61
8301	2	H100_DRIL72.061	H100_DRIL72.061 F2-20	Chile16_112-9	27	28	10	20	25	18.75	62
8302	2	H100_DRIL72.061	H100_DRIL72.061 F2-18	Chile16_112-7	28	28	15	25	30	23.75	62
8303	2	H100_DRIL72.061	H100_DRIL72.061 F2-74	Chile16_117-7	28	27	15	25	30	23.75	60
8304	2	H100_DRIL72.061	H100_DRIL72.061 F2-42	Chile16_115-7	28	26	15	25	30	23.75	60
8305	2	H100_DRIL72.061	H100_DRIL72.061 F2-9	Chile16_114-9	28	25	10	20	30	20	60
8306	2			BBP	28	24				0	#NUM!
8307	2	H100_DRIL52.268	H100_DRIL52.268 F2-17	Chile16_74-7	28	23	10	20	35	21.25	60
8308	2	H100_DRIL52.268	H100_DRIL52.268 F2-5	Chile16_75-5	28	22	15	20	35	22.5	62
8309	2	H100_DRIL52.268	H100_DRIL52.268 F2-28	Chile16_76-5	28	21	15	25	35	25	60
8310	2	DRIL52.268	DRIL52.268	CL16 1417-1	28	20	10	15	30	17.5	62
8311	2	H100	H100	CL14 2142-2	28	19	20	25	35	26.25	59
8312	2	H100_DRIL52.268	H100_DRIL52.268 F2-33	Chile16_76-10	28	18	15	25	35	25	63
8313	2	H100_DRIL52.268	H100_DRIL52.268 F2-38	Chile16_76-15	28	17	15	25	35	25	63
8314	2	H100_DRIL52.268	H100_DRIL52.268 F2-62	Chile16_71-6	28	16	15	20	30	21.25	67
8315	2	H100_DRIL52.268	H100_DRIL52.268 F2-20	Chile16_74-10	28	15	15	25	35	25	63
8316	2	H100_DRIL52.268	H100_DRIL52.268 F2-43	Chile16_73-3	28	14	15	25	35	25	63
8317	2	H100_DRIL52.268	H100_DRIL52.268 F2-54	Chile16_73-14	28	13	15	25	35	25	59
8318	2	H100_DRIL52.268	H100_DRIL52.268 F2-37	Chile16_76-14	28	12	15	25	35	25	63
8319	2	H100_DRIL52.268	H100_DRIL52.268 F2-66	Chile16_71-10	28	11	15	25	35	25	57
8320	2	H100_DRIL52.268	H100_DRIL52.268 F2-65	Chile16_71-9	28	10	15	25	30	23.75	66
8321	2	H100_DRIL52.268	H100_DRIL52.268 F2-18	Chile16_74-8	28	9	15	25	30	23.75	60
8322	2	H100_DRIL52.268	H100_DRIL52.268 F2-30	BBP	28	8				0	#NUM!
8323	2	H100_DRIL52.268	H100_DRIL52.268 F2-64	Chile16_71-8	28	7	20	25	35	26.25	63
8324	2	H100_DRIL52.268	H100_DRIL52.268 F2-32	Chile16_76-9	28	6	15	25	30	23.75	58
8325	2	H100_DRIL52.268	H100_DRIL52.268 F2-36	Chile16_76-13	28	5	15	25	35	25	59
8326	2	H100_DRIL52.268	H100_DRIL52.268 F2-77	Chile16_72-9	28	4	15	25	30	23.75	58
8327	2	H100_DRIL52.268	H100_DRIL52.268 F2-41	Chile16_73-1	28	3	15	25	35	25	62
8328	2	H100_DRIL52.268	H100_DRIL52.268 F2-51	Chile16_73-11	28	2	15	25	35	25	58
8329	2	H100_DRIL52.268	H100_DRIL52.268 F2-15	Chile16_74-5	28	1	15	25	35	25	63
8330	2	H100_DRIL52.268	H100_DRIL52.268 F2-58	Chile16_71-2	29	1	15	25	35	25	58
8331	2	H100_DRIL52.268	H100_DRIL52.268 F2-1	Chile16_75-1	29	2	15	25	30	23.75	60
8332	2	H100_DRIL52.268	H100_DRIL52.268 F2-24	Chile16_76-1	29	3	15	25	35	25	69
8333	2	H100_DRIL52.268	H100_DRIL52.268 F2-63	Chile16_71-7	29	4	20	25	35	26.25	61
8334	2	H100	H100	CL14 2142-2	29	5	25	30	40	31.25	59
8335	2	H100	H100	CL14 2142-2	29	6	25	30	40	31.25	59
8336	2	H100_DRIL52.268	H100_DRIL52.268 F2-42	Chile16_73-2	29	7	15	20	35	22.5	58
8337	2	H100_DRIL52.268	H100_DRIL52.268 F2-31	Chile16_76-8	29	8	15	20	35	22.5	61
8338	2	H100_DRIL52.268	H100_DRIL52.268 F2-40	Chile16_76-17	29	9	15	25	40	26.25	61
8339	2	H100_DRIL52.268	H100_DRIL52.268 F2-70	Chile16_72-2	29	10	20	25	40	27.5	58
8340	2	H100_DRIL52.268	H100_DRIL52.268 F2-68	Chile16_71-12	29	11	15	10	40	18.75	59
8341	2	H100_DRIL52.268	H100_DRIL52.268 F2-11	Chile16_74-1	29	12	15	25	40	26.25	58
8342	2	H100_DRIL52.268	H100_DRIL52.268 F2-10	Chile16_75-10	29	13	15	25	40	26.25	63
8343	2	H100_DRIL52.268	H100_DRIL52.268 F2-8	Chile16_75-8	29	14	15	25	40	26.25	61
8344	2	H100_DRIL52.268	H100_DRIL52.268 F2-21	Chile16_74-11	29	15	30	25	40	30	59
8345	2	H100_DRIL52.268	H100_DRIL52.268 F2-2	Chile16_75-2	29	16	20	25	40	27.5	59
8346	2	H100_DRIL52.268	H100_DRIL52.268 F2-23	Chile16_74-13	29	17	15	25	40	26.25	62
8347	2	H100_DRIL52.268	H100_DRIL52.268 F2-44	Chile16_73-4	29	18	15	25	40	26.25	61
8348	2	H100_DRIL52.268	H100_DRIL52.268 F2-73	Chile16_72-5	29	19	15	25	40	26.25	61
8349	2	H100_DRIL52.268	H100_DRIL52.268 F2-22	Chile16_74-12	29	20	15	25	35	25	63
8350	2	H100_DRIL52.268	H100_DRIL52.268 F2-13	Chile16_74-3	29	21	20	25	40	27.5	63
8351	2	H100_DRIL52.268	H100_DRIL52.268 F2-69	Chile16_72-1	29	22	20	25	40	27.5	58
8352	2	H100_DRIL52.268	H100_DRIL52.268 F2-29	Chile16_76-6	29	23	15	25	40	26.25	61
8353	2	H100_DRIL52.268	H100_DRIL52.268 F2-25	Chile16_76-2	29	24	15	25	40	26.25	59
8354	2	H100	H100	CL14 2142-2	29	25	20	30	45	31.25	59
8355	2	H100_DRIL52.268	H100_DRIL52.268 F2-76	Chile16_72-8	29	26	15	25	40	26.25	63
8356	2	H100_DRIL52.268	H100_DRIL52.268 F2-12	Chile16_74-2	29	27	20	30	40	30	59
8357	2	H100_DRIL52.268	H100_DRIL52.268 F2-9	Chile16_75-9	29	28	20	30	40	30	60
8358	2	H100_DRIL52.268	H100_DRIL52.268 F2-57	Chile16_71-1	30	28	15	25	40	26.25	60
8359	2	H100_DRIL52.268	H100_DRIL52.268 F2-71	Chile16_72-3	30	27	20	30	40	30	58
8360	2	H100_DRIL52.268	H100_DRIL52.268 F2-56	Chile16_73-16	30	26	20	30	40	30	59
8361	2	H100_DRIL52.268	H100_DRIL52.268 F2-35	Chile16_76-12	30	25	20	30	40	30	62
8362	2	H100_DRIL52.268	H100_DRIL52.268 F2-52	Chile16_73-12	30	24	20	30	40	30	63
8363	2	H100	H100	CL14 2142-2	30	23	25	35	45	35	59
8364	2	H100_DRIL52.268	H100_DRIL52.268 F2-16	Chile16_74-6	30	22	20	30	40	30	58
8365	2	H100_DRIL52.268	H100_DRIL52.268 F2-72	Chile16_72-4	30	21	20	30	40	30	59
8366	2	H100_DRIL52.268	H100_DRIL52.268 F2-53	Chile16_73-13	30	20	20	30	40	30	61
8367	2	H100_DRIL52.268	H100_DRIL52.268 F2-75	Chile16_72-7	30	19	20	25	35	26.25	63
8368	2	H100_DRIL52.268	H100_DRIL52.268 F2-55	Chile16_73-15	30	18	20	25	35	26.25	59
8369	2	H100_DRIL52.268	H100_DRIL52.268 F2-60	BBP	30	17				0	#NUM!
8370	2	H100_DRIL52.268	H100_DRIL52.268 F2-6	Chile16_75-6	30	16	15	25	40	26.25	63
8371	2	H100_DRIL52.268	H100_DRIL52.268 F2-4	Chile16_75-4	30	15	20	30	45	31.25	59
8372	2	H100_DRIL52.268	H100_DRIL52.268 F2-67	Chile16_71-11	30	14	20	35	45	33.75	59
8373	2	H100_DRIL52.268	H100_DRIL52.268 F2-48	Chile16_73-8	30	13	15	30	40	28.75	62
8374	2	H100_DRIL52.268	H100_DRIL52.268 F2-3	Chile16_75-3	30	12	15	30	45	30	59
8375	2	H100_DRIL52.268	H100_DRIL52.268 F2-27	Chile16_76-4	30	11	15	30	40	28.75	62
8376	2	H100_DRIL52.268	H100_DRIL52.268 F2-14	Chile16_74-4	30	10	15	30	40	28.75	60
8377	2	H100_DRIL52.268	H100_DRIL52.268 F2-49	Chile16_73-9	30	9	15	25	40	26.25	58
8378	2	H100_DRIL52.268	H100_DRIL52.268 F2-19	BBP	30	8				0	#NUM!
8379	2	H100_DRIL52.268	H100_DRIL52.268 F2-59	Chile16_71-3	30	7	15	20	35	22.5	63
8380	2	H100_DRIL52.268	H100_DRIL52.268 F2-46	Chile16_73-6	30	6	10	20	35	21.25	71
8381	2	H100_DRIL52.268	H100_DRIL52.268 F2-39	Chile16_76-16	30	5	15	25	40	26.25	62
8382	2	H100_DRIL52.268	H100_DRIL52.268 F2-26	Chile16_76-3	30	4	20	30	40	30	59
8383	2	H100_DRIL52.268	H100_DRIL52.268 F2-61	Chile16_71-5	30	3	20	25	35	26.25	59
8384	2	H100_DRIL52.268	H100_DRIL52.268 F2-50	Chile16_73-10	30	2	15	25	35	25	65
8385	2	H100_DRIL52.268	H100_DRIL52.268 F2-47	Chile16_73-7	30	1	15	25	40	26.25	55
8386	2	H100_DRIL52.268	H100_DRIL52.268 F2-7	Chile16_75-7	31	1	20	30	40	30	57
8387	2			BBP	31	2				0	#NUM!
8388	2	H100_DRIL72.040	H100_DRIL72.040 F2-23	Chile16_129-7	3	33	15	20	35	22.5	61
8389	2	H100	H100	CL14 2142-2	3	34	15	25	40	26.25	60
8390	2	H100_DRIL72.040	H100_DRIL72.040 F2-15	Chile16_128-8	3	35	10	25	35	23.75	62
8391	2	H100_DRIL72.040	H100_DRIL72.040 F2-60	Chile16_124-8	3	36	10	15	20	15	60
8392	2	H100_DRIL72.040	H100_DRIL72.040 F2-30	BBP	3	37				0	#NUM!
8393	2	H100_DRIL72.040	H100_DRIL72.040 F2-19	Chile16_129-3	3	38	15	25	35	25	63
8394	2	H100_DRIL72.040	H100_DRIL72.040 F2-16	Chile16_128-9	3	39	15	25	35	25	59
8395	2	H100_DRIL72.040	H100_DRIL72.040 F2-34	Chile16_126-4	3	40	15	25	35	25	63
8396	2	H100	H100	CL14 2142-2	3	41	15	30	40	28.75	60
8397	2	H100_DRIL72.040	H100_DRIL72.040 F2-62	Chile16_124-10	3	42	15	20	30	21.25	65
8398	2	H100_DRIL72.040	H100_DRIL72.040 F2-35	BBP	3	43				0	#NUM!
8399	2	H100_DRIL72.040	H100_DRIL72.040 F2-12	Chile16_128-5	3	44	20	25	40	27.5	58
8400	2	H100	H100	CL14 2142-2	3	45	20	30	45	31.25	60
8401	2	H100_DRIL72.040	H100_DRIL72.040 F2-3	Chile16_125-3	3	46	15	25	40	26.25	59
8402	2	H100_DRIL72.040	H100_DRIL72.040 F2-54	Chile16_124-2	3	47	15	25	40	26.25	59
8403	2	H100_DRIL72.040	H100_DRIL72.040 F2-38	BBP	3	48				0	#NUM!
8404	2	H100_DRIL72.040	H100_DRIL72.040 F2-20	Chile16_129-4	3	49	10	20	35	21.25	62
8405	2	H100_DRIL72.040	H100_DRIL72.040 F2-61	Chile16_124-9	3	50	15	25	35	25	58
8406	2	H100_DRIL72.040	H100_DRIL72.040 F2-45	Chile16_127-5	3	51	15	25	40	26.25	60
8407	2	H100_DRIL72.040	H100_DRIL72.040 F2-21	Chile16_129-5	3	52	15	25	40	26.25	60
8408	2	H100_DRIL72.040	H100_DRIL72.040 F2-49	Chile16_127-9	3	53	15	25	40	26.25	60
8409	2	H100_DRIL72.040	H100_DRIL72.040 F2-41	Chile16_127-1	3	54	20	25	45	28.75	60
8410	2	H100_DRIL72.040	H100_DRIL72.040 F2-9	Chile16_128-2	3	55	15	25	40	26.25	60
8411	2	H100_DRIL72.040	H100_DRIL72.040 F2-40	Chile16_126-10	3	56	15	25	40	26.25	60
8412	2	H100_DRIL72.040	H100_DRIL72.040 F2-13	Chile16_128-6	3	57	15	25	40	26.25	60
8413	2	H100_DRIL72.040	H100_DRIL72.040 F2-50	Chile16_127-10	3	58	15	25	40	26.25	59
8414	2	H100_DRIL72.040	H100_DRIL72.040 F2-28	Chile16_129-12	3	59	np		np	#VALUE!	#NUM!
8415	2	H100_DRIL72.040	H100_DRIL72.040 F2-44	Chile16_127-4	4	59	np	40:<3	30:<3	#VALUE!	63
8416	2	H100_DRIL72.040	H100_DRIL72.040 F2-46	Chile16_127-6	4	58	15	25	40	26.25	61
8417	2	H100_DRIL72.040	H100_DRIL72.040 F2-56	Chile16_124-4	4	57	15	25	40	26.25	61
8418	2	H100_DRIL72.040	H100_DRIL72.040 F2-37	BBP	4	56				0	#NUM!
8419	2	DRIL72.040	DRIL72.040	CL16 649-1	4	55	10	20	35	21.25	62
8420	2	H100_DRIL72.040	H100_DRIL72.040 F2-58	Chile16_124-6	4	54	15	20	35	22.5	63
8421	2	H100_DRIL72.040	H100_DRIL72.040 F2-59	Chile16_124-7	4	53	15	25	35	25	61
8422	2	H100_DRIL72.040	H100_DRIL72.040 F2-42	Chile16_127-2	4	52	15	25	40	26.25	58
8423	2	H100_DRIL72.040	H100_DRIL72.040 F2-1	Chile16_125-1	4	51	15	25	40	26.25	61
8424	2	H100_DRIL72.040	H100_DRIL72.040 F2-31	Chile16_126-1	4	50	15	20	40	23.75	60
8425	2	H100_DRIL72.040	H100_DRIL72.040 F2-53	Chile16_124-1	4	49	10	20	35	21.25	61
8426	2	H100_DRIL72.040	H100_DRIL72.040 F2-55	Chile16_124-3	4	48	15	25	40	26.25	58
8427	2	H100_DRIL72.040	H100_DRIL72.040 F2-52	Chile16_127-12	4	47	15	25	40	26.25	59
8428	2	H100_DRIL72.040	H100_DRIL72.040 F2-26	Chile16_129-10	4	46	15	25	40	26.25	58
8429	2	H100_DRIL72.040	H100_DRIL72.040 F2-29	Chile16_129-13	4	45	15	25	35	25	60
8430	2	H100_DRIL72.040	H100_DRIL72.040 F2-24	Chile16_129-8	4	44	20	25	40	27.5	57
8431	2	H100_DRIL72.040	H100_DRIL72.040 F2-64	Chile16_124-12	4	43	15	25	40	26.25	59
8432	2	H100_DRIL72.040	H100_DRIL72.040 F2-32	Chile16_126-2	4	42	15	25	35	25	60
8433	2	H100	H100	CL14 2142-2	4	41	20	25	40	27.5	59
8434	2	H100_DRIL72.040	H100_DRIL72.040 F2-10	Chile16_128-3	4	40	15	20	35	22.5	60
8435	2	H100_DRIL72.040	H100_DRIL72.040 F2-18	Chile16_129-2	4	39	15	20	35	22.5	63
8436	2	H100_DRIL72.040	H100_DRIL72.040 F2-43	Chile16_127-3	4	38	10	20	35	21.25	60
8437	2	H100_DRIL72.040	H100_DRIL72.040 F2-63	Chile16_124-11	4	37	10	20	35	21.25	59
8438	2	H100_DRIL72.040	H100_DRIL72.040 F2-57	Chile16_124-5	4	36	15	20	35	22.5	62
8439	2	H100_DRIL72.040	H100_DRIL72.040 F2-4	Chile16_125-4	4	35	15	25	40	26.25	59
8440	2	H100_DRIL72.040	H100_DRIL72.040 F2-22	Chile16_129-6	4	34	10	20	40	22.5	61
8441	2	H100_DRIL72.040	H100_DRIL72.040 F2-51	Chile16_127-11	4	33	10	20	35	21.25	61
8442	2	H100_DRIL72.040	H100_DRIL72.040 F2-14	Chile16_128-7	5	33	15	25	40	26.25	63
8443	2	H100_DRIL72.040	H100_DRIL72.040 F2-11	Chile16_128-4	5	34	15	25	40	26.25	61
8444	2	H100_DRIL72.040	H100_DRIL72.040 F2-8	Chile16_128-1	5	35	15	25	40	26.25	58
8445	2	H100_DRIL72.040	H100_DRIL72.040 F2-48	BBP	5	36				0	#NUM!
8446	2	H100_DRIL72.040	H100_DRIL72.040 F2-47	Chile16_127-7	5	37	15	20	40	23.75	59
8447	2	H100_DRIL72.040	H100_DRIL72.040 F2-27	Chile16_129-11	5	38	15	25	40	26.25	61
8448	2	H100_DRIL72.040	H100_DRIL72.040 F2-39	BBP	5	39				0	#NUM!
8449	2	H100_DRIL72.040	H100_DRIL72.040 F2-5	Chile16_125-5	5	40	15	25	40	26.25	60
8450	2	H100_DRIL72.040	H100_DRIL72.040 F2-17	Chile16_129-1	5	41	15	25	40	26.25	62
8451	2	H100_DRIL72.040	H100_DRIL72.040 F2-25	Chile16_129-9	5	42	15	25	35	25	62
8452	2	H100_DRIL72.040	H100_DRIL72.040 F2-2	Chile16_125-2	5	43	15	25	35	25	63
8453	2			BBP	5	44				0	#NUM!
8454	2	H100	H100	CL14 2142-2	5	45	20	30	45	31.25	60
8455	2	H100_DRIL52.157	H100_DRIL52.157 F2-25	Chile16_67-9	5	46	15	25	40	26.25	60
8456	2	H100	H100	CL14 2142-2	5	47	20	25	40	27.5	61
8457	2	H100_DRIL52.157	H100_DRIL52.157 F2-100	Chile16_68-15	5	48	20	25	40	27.5	58
8458	2	H100_DRIL52.157	H100_DRIL52.157 F2-34	Chile16_70-3	5	49	15	25	40	26.25	61
8459	2	H100_DRIL52.157	H100_DRIL52.157 F2-89	Chile16_68-4	5	50	15	25	40	26.25	58
8460	2	H100_DRIL52.157	H100_DRIL52.157 F2-66	Chile16_66-16	5	51	15	25	40	26.25	60
8461	2	H100_DRIL52.157	H100_DRIL52.157 F2-96	Chile16_68-11	5	52	20	30	40	30	58
8462	2	H100_DRIL52.157	H100_DRIL52.157 F2-35	Chile16_70-4	5	53	15	25	40	26.25	59
8463	2	H100_DRIL52.157	H100_DRIL52.157 F2-88	Chile16_68-3	5	54	20	25	40	27.5	58
8464	2	H100_DRIL52.157	H100_DRIL52.157 F2-19	Chile16_67-3	5	55	20	30	40	30	58
8465	2	H100_DRIL52.157	H100_DRIL52.157 F2-37	Chile16_70-6	5	56	20	30	40	30	58
8466	2	H100_DRIL52.157	H100_DRIL52.157 F2-71	Chile16_69-3	5	57	20	30	40	30	60
8467	2	H100_DRIL52.157	H100_DRIL52.157 F2-18	Chile16_67-2	5	58	15	25	40	26.25	60
8468	2	H100_DRIL52.157	H100_DRIL52.157 F2-94	Chile16_68-9	5	59	15	25	35	25	60
8469	2	H100_DRIL52.157	H100_DRIL52.157 F2-4	Chile16_65-4	6	59	15	25	40	26.25	59
8470	2	H100_DRIL52.157	H100_DRIL52.157 F2-45	Chile16_70-14	6	58	15	25	40	26.25	60
8471	2	H100_DRIL52.157	H100_DRIL52.157 F2-67	Chile16_66-17	6	57	15	25	35	25	60
8472	2	H100	H100	CL14 2142-2	6	56	20	30	40	30	59
8473	2	H100_DRIL52.157	H100_DRIL52.157 F2-31	Chile16_67-15	6	55	15	25	40	26.25	58
8474	2	H100_DRIL52.157	H100_DRIL52.157 F2-46	Chile16_70-15	6	54	15	25	40	26.25	58
8475	2	H100_DRIL52.157	H100_DRIL52.157 F2-70	Chile16_69-2	6	53	15	30	40	28.75	59
8476	2	H100_DRIL52.157	H100_DRIL52.157 F2-20	Chile16_67-4	6	52	15	20	35	22.5	59
8477	2	H100_DRIL52.157	H100_DRIL52.157 F2-83	Chile16_69-15	6	51	15	25	40	26.25	58
8478	2	H100_DRIL52.157	H100_DRIL52.157 F2-75	Chile16_69-7	6	50	15	25	40	26.25	59
8479	2	H100_DRIL52.157	H100_DRIL52.157 F2-7	Chile16_65-7	6	49	10	20	35	21.25	61
8480	2	H100_DRIL52.157	H100_DRIL52.157 F2-27	Chile16_67-11	6	48	15	25	40	26.25	58
8481	2	H100_DRIL52.157	H100_DRIL52.157 F2-22	Chile16_67-6	6	47	15	25	40	26.25	60
8482	2	H100_DRIL52.157	H100_DRIL52.157 F2-56	Chile16_66-6	6	46	15	25	40	26.25	58
8483	2	H100	H100	CL14 2142-2	6	45	20	35	45	33.75	58
8484	2	H100_DRIL52.157	H100_DRIL52.157 F2-3	Chile16_65-3	6	44	15	25	35	25	58
8485	2	H100_DRIL52.157	H100_DRIL52.157 F2-39	Chile16_70-8	6	43	15	25	40	26.25	57
8486	2	H100_DRIL52.157	H100_DRIL52.157 F2-6	Chile16_65-6	6	42	15	25	40	26.25	58
8487	2	H100_DRIL52.157	H100_DRIL52.157 F2-2	Chile16_65-2	6	41	15	25	35	25	55
8488	2	H100_DRIL52.157	H100_DRIL52.157 F2-55	Chile16_66-5	6	40	15	25	40	26.25	58
8489	2	H100_DRIL52.157	H100_DRIL52.157 F2-101	Chile16_68-16	6	39	15	25	40	26.25	58
8490	2	H100_DRIL52.157	H100_DRIL52.157 F2-54	Chile16_66-4	6	38	15	25	35	25	61
8491	2	H100_DRIL52.157	H100_DRIL52.157 F2-32	Chile16_70-1	6	37	15	30	45	30	57
8492	2	H100_DRIL52.157	H100_DRIL52.157 F2-26	Chile16_67-10	6	36	15	25	40	26.25	59
8493	2	H100_DRIL52.157	H100_DRIL52.157 F2-33	Chile16_70-2	6	35	15	30	40	28.75	58
8494	2	H100_DRIL52.157	H100_DRIL52.157 F2-84	Chile16_69-16	6	34	15	25	40	26.25	61
8495	2	H100_DRIL52.157	H100_DRIL52.157 F2-73	Chile16_69-5	6	33	15	25	40	26.25	59
8496	2	H100_DRIL52.157	H100_DRIL52.157 F2-51	Chile16_66-1	7	33	15	25	35	25	58
8497	2	H100_DRIL52.157	H100_DRIL52.157 F2-9	Chile16_65-9	7	34	15	25	35	25	60
8498	2	H100_DRIL52.157	H100_DRIL52.157 F2-60	Chile16_66-10	7	35	15	25	35	25	56
8499	2	H100_DRIL52.157	H100_DRIL52.157 F2-59	Chile16_66-9	7	36	15	25	40	26.25	60
8500	2	H100_DRIL52.157	H100_DRIL52.157 F2-63	Chile16_66-13	7	37	15	25	40	26.25	57
8501	2	H100_DRIL52.157	H100_DRIL52.157 F2-98	Chile16_68-13	7	38	10	25	40	25	60
8502	2	H100_DRIL52.157	H100_DRIL52.157 F2-57	Chile16_66-7	7	39	15	25	40	26.25	59
8503	2	H100_DRIL52.157	H100_DRIL52.157 F2-79	Chile16_69-11	7	40	15	25	40	26.25	58
8504	2	H100_DRIL52.157	H100_DRIL52.157 F2-68	Chile16_66-18	7	41	20	25	40	27.5	58
8505	2	H100_DRIL52.157	H100_DRIL52.157 F2-62	Chile16_66-12	7	42	20	30	40	30	56
8506	2	H100_DRIL52.157	H100_DRIL52.157 F2-23	Chile16_67-7	7	43	15	30	40	28.75	55
8507	2	H100_DRIL52.157	H100_DRIL52.157 F2-17	Chile16_67-1	7	44	15	25	40	26.25	56
8508	2	H100_DRIL52.157	H100_DRIL52.157 F2-36	Chile16_70-5	7	45	15	25	40	26.25	58
8509	2	H100_DRIL52.157	H100_DRIL52.157 F2-43	Chile16_70-12	7	46	20	30	45	31.25	57
8510	2	H100_DRIL52.157	H100_DRIL52.157 F2-74	Chile16_69-6	7	47	20	25	45	28.75	56
8511	2	H100_DRIL52.157	H100_DRIL52.157 F2-52	Chile16_66-2	7	48	15	30	40	28.75	55
8512	2	H100_DRIL52.157	H100_DRIL52.157 F2-47	Chile16_70-16	7	49	15	25	40	26.25	59
8513	2	H100_DRIL52.157	H100_DRIL52.157 F2-5	Chile16_65-5	7	50	15	30	40	28.75	56
8514	2	H100_DRIL52.157	H100_DRIL52.157 F2-82	Chile16_69-14	7	51	15	30	40	28.75	59
8515	2	H100	H100	CL14 2142 bulk	7	52	15	30	50	31.25	56
8516	2	H100_DRIL52.157	H100_DRIL52.157 F2-24	Chile16_67-8	7	53	20	30	40	30	58
8517	2	H100_DRIL52.157	H100_DRIL52.157 F2-78	Chile16_69-10	7	54	20	30	45	31.25	58
8518	2	H100_DRIL52.157	H100_DRIL52.157 F2-29	Chile16_67-13	7	55	15	25	40	26.25	59
8519	2	DRIL52.157	DRIL52.157	CL16 1414-2	7	56	15	20	40	23.75	57
8520	2	H100_DRIL52.157	H100_DRIL52.157 F2-97	Chile16_68-12	7	57	15	25	40	26.25	61
8521	2	H100_DRIL52.157	H100_DRIL52.157 F2-87	Chile16_68-2	7	58	15	25	35	25	58
8522	2	H100_DRIL52.157	H100_DRIL52.157 F2-12	Chile16_65-12	7	59	20	25	40	27.5	61
8523	2	H100_DRIL52.157	H100_DRIL52.157 F2-77	Chile16_69-9	8	59	15	25	35	25	58
8524	2	H100_DRIL52.157	H100_DRIL52.157 F2-72	Chile16_69-4	8	58	20	30	35	28.75	55
8525	2	H100_DRIL52.157	H100_DRIL52.157 F2-93	Chile16_68-8	8	57	cs	cs	np	#VALUE!	61
8526	2	H100_DRIL52.157	H100_DRIL52.157 F2-85	Chile16_69-17	8	56	cs	cs		#VALUE!	56
8527	2	H100_DRIL52.157	H100_DRIL52.157 F2-92	Chile16_68-7	8	55	15	25	40	26.25	58
8528	2	H100_DRIL52.157	H100_DRIL52.157 F2-10	Chile16_65-10	8	54	15	20	35	22.5	58
8529	2	H100_DRIL52.157	H100_DRIL52.157 F2-86	Chile16_68-1	8	53	15	25	35	25	59
8530	2	H100_DRIL52.157	H100_DRIL52.157 F2-11	Chile16_65-11	8	52	15	25	40	26.25	57
8531	2	H100	H100	CL14 2142 bulk	8	51	20	25	45	28.75	61
8532	2	H100_DRIL52.157	H100_DRIL52.157 F2-41	Chile16_70-10	8	50	15	25	40	26.25	57
8533	2	H100_DRIL52.157	H100_DRIL52.157 F2-61	Chile16_66-11	8	49	15	25	40	26.25	58
8534	2	H100_DRIL52.157	H100_DRIL52.157 F2-64	Chile16_66-14	8	48	15	25	40	26.25	57
8535	2	H100_DRIL52.157	H100_DRIL52.157 F2-49	Chile16_70-18	8	47	20	25	40	27.5	59
8536	2	H100_DRIL52.157	H100_DRIL52.157 F2-15	Chile16_65-15	8	46	15	25	40	26.25	59
8537	2	H100_DRIL52.157	H100_DRIL52.157 F2-21	Chile16_67-5	8	45	15	25	35	25	59
8538	2	H100_DRIL52.157	H100_DRIL52.157 F2-8	Chile16_65-8	8	44	20	25	40	27.5	56
8539	2	H100_DRIL52.157	H100_DRIL52.157 F2-38	Chile16_70-7	8	43	15	25	35	25	57
8540	2	H100_DRIL52.157	H100_DRIL52.157 F2-48	Chile16_70-17	8	42	15	25	35	25	59
8541	2	H100_DRIL52.157	H100_DRIL52.157 F2-13	Chile16_65-13	8	41	15	25	35	25	59
8542	2	H100_DRIL52.157	H100_DRIL52.157 F2-69	Chile16_69-1	8	40	15	25	35	25	58
8543	2	H100_DRIL52.157	H100_DRIL52.157 F2-50	Chile16_70-19	8	39	15	25	35	25	61
8544	2	H100_DRIL52.157	H100_DRIL52.157 F2-81	Chile16_69-13	8	38	15	25	20	21.25	57
8545	2	H100_DRIL52.157	H100_DRIL52.157 F2-16	Chile16_65-16	8	37	15	25	40	26.25	59
8546	2	H100_DRIL52.157	H100_DRIL52.157 F2-58	Chile16_66-8	8	36	15	25	35	25	59
8547	2	H100_DRIL52.157	H100_DRIL52.157 F2-1	Chile16_65-1	8	35	15	25	35	25	58
8548	2	H100_DRIL52.157	H100_DRIL52.157 F2-30	Chile16_67-14	8	34	15	25	35	25	60
8549	2	H100_DRIL52.157	H100_DRIL52.157 F2-76	Chile16_69-8	8	33	10	20	35	21.25	59
8550	2	H100_DRIL52.157	H100_DRIL52.157 F2-44	Chile16_70-13	9	33	15	25	35	25	58
8551	2	H100_DRIL52.157	H100_DRIL52.157 F2-80	Chile16_69-12	9	34	15	25	40	26.25	55
8552	2	H100_DRIL52.157	H100_DRIL52.157 F2-28	Chile16_67-12	9	35	15	25	40	26.25	57
8553	2	H100_DRIL52.157	H100_DRIL52.157 F2-95	Chile16_68-10	9	36	15	25	35	25	58
8554	2	H100_DRIL52.157	H100_DRIL52.157 F2-90	Chile16_68-5	9	37	15	25	40	26.25	57
8555	2	H100_DRIL52.157	H100_DRIL52.157 F2-99	Chile16_68-14	9	38	15	25	40	26.25	58
8556	2	H100_DRIL52.157	H100_DRIL52.157 F2-14	Chile16_65-14	9	39	15	25	40	26.25	56
8557	2	H100_DRIL52.157	H100_DRIL52.157 F2-42	Chile16_70-11	9	40	20	25	35	26.25	58
8558	2	H100_DRIL52.157	H100_DRIL52.157 F2-91	Chile16_68-6	9	41	15	25	40	26.25	59
8559	2			BBP	9	42				0	#NUM!
8560	2	H100	H100	CL14 2142 bulk	9	43	25	30	45	32.5	59
8561	2	H100_DRIL72.232	H100_DRIL72.232 F2-10	Chile16_118-1	9	44	20	25	40	27.5	58
8562	2	H100_DRIL72.232	H100_DRIL72.232 F2-49	Chile16_122-1	9	45	20	25	40	27.5	59
8563	2	H100_DRIL72.232	H100_DRIL72.232 F2-53	Chile16_122-5	9	46	15	25	40	26.25	59
8564	2	H100_DRIL72.232	H100_DRIL72.232 F2-42	Chile16_121-5	9	47	20	25	40	27.5	59
8565	2	H100	H100	CL14 2142 bulk	9	48	25	30	50	33.75	55
8566	2	H100_DRIL72.232	H100_DRIL72.232 F2-6	Chile16_123-6	9	49	15	25	45	27.5	56
8567	2	H100_DRIL72.232	H100_DRIL72.232 F2-7	Chile16_123-7	9	50	15	25	40	26.25	61
8568	2	H100_DRIL72.232	H100_DRIL72.232 F2-50	Chile16_122-2	9	51	20	25	40	27.5	57
8569	2	H100_DRIL72.232	H100_DRIL72.232 F2-29	Chile16_120-3	9	52	20	30	40	30	60
8570	2	H100_DRIL72.232	H100_DRIL72.232 F2-32	Chile16_120-6	9	53	np	np	np	#VALUE!	61
8571	2	H100_DRIL72.232	H100_DRIL72.232 F2-4	Chile16_123-4	9	54	20	25	40	27.5	60
8572	2	H100_DRIL72.232	H100_DRIL72.232 F2-18	Chile16_118-9	9	55	np	np	np	#VALUE!	62
8573	2	H100_DRIL72.232	H100_DRIL72.232 F2-41	Chile16_121-4	9	56	np	np	45	#VALUE!	61
8574	2	H100_DRIL72.232	H100_DRIL72.232 F2-45	Chile16_121-8	9	57	20	25	45	28.75	61
8575	2	H100_DRIL72.232	H100_DRIL72.232 F2-40	Chile16_121-3	9	58	15	25	45	27.5	61
8576	2	H100_DRIL72.232	H100_DRIL72.232 F2-52	Chile16_122-4	9	59	20	30	40	30	61
8577	2	H100_DRIL72.232	H100_DRIL72.232 F2-3	Chile16_123-3	10	59	20	25	40	27.5	60
8578	2	H100_DRIL72.232	H100_DRIL72.232 F2-30	BBP	10	58				0	61
8579	2	H100_DRIL72.232	H100_DRIL72.232 F2-5	Chile16_123-5	10	57	np	np	np	#VALUE!	#NUM!
8580	2	H100_DRIL72.232	H100_DRIL72.232 F2-26	Chile16_119-7	10	56	20	30	45	31.25	59
8581	2	DRIL72.232	DRIL72.232	CL17 287-1	10	55	5	20	35	20	60
8582	2	H100_DRIL72.232	H100_DRIL72.232 F2-16	Chile16_118-7	10	54	35	30	40	33.75	58
8583	2	H100_DRIL72.232	H100_DRIL72.232 F2-9	Chile16_123-9	10	53	20	25	40	27.5	61
8584	2	H100_DRIL72.232	H100_DRIL72.232 F2-15	Chile16_118-6	10	52	20	30	40	30	59
8585	2	H100_DRIL72.232	H100_DRIL72.232 F2-21	Chile16_119-2	10	51	15	25	40	26.25	61
8586	2	H100_DRIL72.232	H100_DRIL72.232 F2-19	Chile16_118-10	10	50	35	25	40	31.25	59
8587	2	H100_DRIL72.232	H100_DRIL72.232 F2-62	Chile16_122-14	10	49	20	25	35	26.25	60
8588	2	H100_DRIL72.232	H100_DRIL72.232 F2-44	Chile16_121-7	10	48	20	30	40	30	60
8589	2	H100_DRIL72.232	H100_DRIL72.232 F2-8	Chile16_123-8	10	47	15	25	40	26.25	60
8590	2	H100_DRIL72.232	H100_DRIL72.232 F2-37	Chile16_120-11	10	46	20	30	40	30	59
8591	2	H100_DRIL72.232	H100_DRIL72.232 F2-28	Chile16_120-2	10	45	15	25	40	26.25	60
8592	2	H100_DRIL72.232	H100_DRIL72.232 F2-48	BBP	10	44				0	#NUM!
8593	2	H100_DRIL72.232	H100_DRIL72.232 F2-57	Chile16_122-9	10	43	15	25	40	26.25	60
8594	2	H100_DRIL72.232	H100_DRIL72.232 F2-47	Chile16_121-10	10	42	15	25	40	26.25	60
8595	2	H100_DRIL72.232	H100_DRIL72.232 F2-34	Chile16_120-8	10	41	15	25	35	25	59
8596	2	H100	H100	CL14 2142 bulk	10	40	20	30	45	31.25	59
8597	2	H100_DRIL72.232	H100_DRIL72.232 F2-1	Chile16_123-1	10	39	15	30	40	28.75	59
8598	2	H100_DRIL72.232	H100_DRIL72.232 F2-24	Chile16_119-5	10	38	15	25	40	26.25	60
8599	2	H100_DRIL72.232	H100_DRIL72.232 F2-23	BBP	10	37				0	#NUM!
8600	2	H100_DRIL72.232	H100_DRIL72.232 F2-17	Chile16_118-8	10	36	15	25	40	26.25	59
8601	2	H100_DRIL72.232	H100_DRIL72.232 F2-46	Chile16_121-9	10	35	20	30	40	30	59
8602	2	H100_DRIL72.232	H100_DRIL72.232 F2-55	Chile16_122-7	10	34	20	30	40	30	60
8603	2	H100_DRIL72.232	H100_DRIL72.232 F2-27	Chile16_120-1	10	33	15	25	40	26.25	58
8604	2	H100_DRIL72.232	H100_DRIL72.232 F2-13	Chile16_118-4	11	33	10	20	35	21.25	60
8605	2	H100_DRIL72.232	H100_DRIL72.232 F2-20	Chile16_119-1	11	34	15	25	40	26.25	60
8606	2	H100_DRIL72.232	H100_DRIL72.232 F2-12	Chile16_118-3	11	35	20	30	40	30	58
8607	2	H100_DRIL72.232	H100_DRIL72.232 F2-51	BBP	11	36				0	#NUM!
8608	2	H100	H100	CL14 2142 bulk	11	37	20	30	50	32.5	58
8609	2	H100_DRIL72.232	H100_DRIL72.232 F2-36	Chile16_120-10	11	38	20	25	45	28.75	60
8610	2	H100_DRIL72.232	H100_DRIL72.232 F2-39	Chile16_121-2	11	39	20	25	40	27.5	59
8611	2	H100_DRIL72.232	H100_DRIL72.232 F2-35	Chile16_120-9	11	40	20	25	45	28.75	60
8612	2	H100_DRIL72.232	H100_DRIL72.232 F2-11	Chile16_118-2	11	41	20	25	40	27.5	59
8613	2	H100_DRIL72.232	H100_DRIL72.232 F2-31	Chile16_120-5	11	42	20	25	40	27.5	60
8614	2	H100_DRIL72.232	H100_DRIL72.232 F2-38	Chile16_121-1	11	43	15	30	40	28.75	61
8615	2	H100_DRIL72.232	H100_DRIL72.232 F2-56	Chile16_122-8	11	44	20	30	45	31.25	58
8616	2	H100_DRIL72.232	H100_DRIL72.232 F2-14	Chile16_118-5	11	45	15	30	40	28.75	61
8617	2	H100_DRIL72.232	H100_DRIL72.232 F2-59	Chile16_122-11	11	46	15	25	40	26.25	61
8618	2	H100_DRIL72.232	H100_DRIL72.232 F2-43	Chile16_121-6	11	47	15	25	40	26.25	60
8619	2	H100_DRIL72.232	H100_DRIL72.232 F2-2	Chile16_123-2	11	48	20	30	45	31.25	56
8620	2	H100_DRIL72.232	H100_DRIL72.232 F2-61	Chile16_122-13	11	49	np	np	np	#VALUE!	#NUM!
8621	2			BBP	11	50				0	#NUM!
8622	2	H100_DRIL62.156	H100_DRIL62.156 F2-46	Chile16_104-4	11	51	15	30	40	28.75	62
8623	2	H100_DRIL62.156	H100_DRIL62.156 F2-2	Chile16_100-2	11	52	15	25	40	26.25	62
8624	2	H100_DRIL62.156	H100_DRIL62.156 F2-61	Chile16_105-10	11	53	15	25	40	26.25	63
8625	2	H100_DRIL62.156	H100_DRIL62.156 F2-40	Chile16_103-8	11	54	15	25	40	26.25	60
8626	2	H100_DRIL62.156	H100_DRIL62.156 F2-58	Chile16_105-7	11	55	20	30	45	31.25	58
8627	2	H100_DRIL62.156	H100_DRIL62.156 F2-23	Chile16_102-4	11	56	20	30	45	31.25	64
8628	2	H100	H100	CL14 2142 bulk	11	57	25	30	50	33.75	59
8629	2	H100_DRIL62.156	H100_DRIL62.156 F2-4	Chile16_100-4	11	58	20	25	40	27.5	63
8630	2	H100_DRIL62.156	H100_DRIL62.156 F2-6	Chile16_100-6	11	59	15	25	40	26.25	62
8631	2	H100_DRIL62.156	H100_DRIL62.156 F2-21	Chile16_102-2	12	59	20	30	45	31.25	58
8632	2	H100_DRIL62.156	H100_DRIL62.156 F2-47	Chile16_104-5	12	58	15	25	40	26.25	62
8633	2	H100_DRIL62.156	H100_DRIL62.156 F2-1	Chile16_100-1	12	57	15	25	40	26.25	60
8634	2	H100_DRIL62.156	H100_DRIL62.156 F2-32	Chile16_102-13	12	56	15	25	45	27.5	62
8635	2	H100_DRIL62.156	H100_DRIL62.156 F2-18	Chile16_101-8	12	55	15	25	40	26.25	63
8636	2	H100_DRIL62.156	H100_DRIL62.156 F2-49	Chile16_104-7	12	54	20	25	40	27.5	63
8637	2	H100_DRIL62.156	H100_DRIL62.156 F2-3	Chile16_100-3	12	53	20	25	40	27.5	63
8638	2	H100_DRIL62.156	H100_DRIL62.156 F2-59	Chile16_105-8	12	52	15	25	45	27.5	61
8639	2	H100_DRIL62.156	H100_DRIL62.156 F2-31	Chile16_102-12	12	51	15	25	45	27.5	60
8640	2	H100_DRIL62.156	H100_DRIL62.156 F2-42	Chile16_103-10	12	50	15	25	40	26.25	61
8641	2	H100_DRIL62.156	H100_DRIL62.156 F2-14	Chile16_101-4	12	49	15	25	40	26.25	61
8642	2	H100_DRIL62.156	H100_DRIL62.156 F2-26	Chile16_102-7	12	48	15	25	40	26.25	60
8643	2	H100_DRIL62.156	H100_DRIL62.156 F2-48	Chile16_104-6	12	47	15	25	40	26.25	60
8644	2	H100_DRIL62.156	H100_DRIL62.156 F2-34	Chile16_103-2	12	46	20	30	45	31.25	59
8645	2	H100_DRIL62.156	H100_DRIL62.156 F2-22	Chile16_102-3	12	45	10	20	40	22.5	63
8646	2	H100_DRIL62.156	H100_DRIL62.156 F2-7	Chile16_100-7	12	44	10	20	40	22.5	62
8647	2	H100_DRIL62.156	H100_DRIL62.156 F2-9	Chile16_100-9	12	43	15	20	40	23.75	61
8648	2	H100_DRIL62.156	H100_DRIL62.156 F2-35	Chile16_103-3	12	42	15	20	40	23.75	61
8649	2	H100_DRIL62.156	H100_DRIL62.156 F2-60	Chile16_105-9	12	41	15	25	40	26.25	60
8650	2	H100_DRIL62.156	H100_DRIL62.156 F2-17	Chile16_101-7	12	40	15	25	40	26.25	62
8651	2	H100_DRIL62.156	H100_DRIL62.156 F2-39	Chile16_103-7	12	39	10	25	40	25	63
8652	2	H100_DRIL62.156	H100_DRIL62.156 F2-54	Chile16_105-3	12	38	15	25	40	26.25	61
8653	2	H100_DRIL62.156	H100_DRIL62.156 F2-12	Chile16_101-2	12	37	15	25	40	26.25	61
8654	2	H100	H100	CL14 2142 bulk	12	36	15	25	50	28.75	59
8655	2	H100_DRIL62.156	H100_DRIL62.156 F2-52	Chile16_105-1	12	35	15	25	40	26.25	60
8656	2	H100	H100	CL14 2142 bulk	12	34	15	25	40	26.25	60
8657	2	H100_DRIL62.156	H100_DRIL62.156 F2-19	Chile16_101-9	12	33	10	25	40	25	61
8658	2	H100_DRIL62.156	H100_DRIL62.156 F2-36	Chile16_103-4	13	33	15	25	40	26.25	60
8659	2	H100_DRIL62.156	H100_DRIL62.156 F2-10	Chile16_100-10	13	34	10	25	40	25	62
8660	2	H100_DRIL62.156	H100_DRIL62.156 F2-5	Chile16_100-5	13	35	20	30	45	31.25	60
8661	2	H100_DRIL62.156	H100_DRIL62.156 F2-8	Chile16_100-8	13	36	15	25	40	26.25	61
8662	2	H100_DRIL62.156	H100_DRIL62.156 F2-20	Chile16_102-1	13	37	10	20	40	22.5	62
8663	2	H100_DRIL62.156	H100_DRIL62.156 F2-30	Chile16_102-11	13	38	15	25	40	26.25	62
8664	2	H100_DRIL62.156	H100_DRIL62.156 F2-53	Chile16_105-2	13	39	15	25	40	26.25	62
8665	2	H100_DRIL62.156	H100_DRIL62.156 F2-56	Chile16_105-5	13	40	15	25	40	26.25	66
8666	2	H100_DRIL62.156	H100_DRIL62.156 F2-16	Chile16_101-6	13	41	15	25	40	26.25	61
8667	2	H100_DRIL62.156	H100_DRIL62.156 F2-24	Chile16_102-5	13	42	15	25	40	26.25	62
8668	2	H100_DRIL62.156	H100_DRIL62.156 F2-15	Chile16_101-5	13	43	15	25	40	26.25	61
8669	2	H100_DRIL62.156	H100_DRIL62.156 F2-50	Chile16_104-8	13	44	15	25	40	26.25	65
8670	2	H100_DRIL62.156	H100_DRIL62.156 F2-27	Chile16_102-8	13	45	15	20	40	23.75	62
8671	2	H100_DRIL62.156	H100_DRIL62.156 F2-45	Chile16_104-3	13	46	10	20	40	22.5	61
8672	2	H100_DRIL62.156	H100_DRIL62.156 F2-33	Chile16_103-1	13	47	10	20	40	22.5	62
8673	2	H100_DRIL62.156	H100_DRIL62.156 F2-11	Chile16_101-1	13	48	20	30	50	32.5	59
8674	2	H100_DRIL62.156	H100_DRIL62.156 F2-25	Chile16_102-6	13	49	15	20	40	23.75	64
8675	2	H100_DRIL62.156	H100_DRIL62.156 F2-44	Chile16_104-2	13	50	15	25	45	27.5	61
8676	2	H100_DRIL62.156	H100_DRIL62.156 F2-55	Chile16_105-4	13	51	15	25	45	27.5	60
8677	2	H100_DRIL62.156	H100_DRIL62.156 F2-63	Chile16_105-12	13	52	15	25	40	26.25	62
8678	2	H100_DRIL62.156	H100_DRIL62.156 F2-38	Chile16_103-6	13	53	15	25	40	26.25	61
8679	2	H100	H100	CL14 2142 bulk	13	54	20	30	50	32.5	59
8680	2	H100_DRIL62.156	H100_DRIL62.156 F2-62	Chile16_105-11	13	55	15	25	45	27.5	62
8681	2	H100_DRIL62.156	H100_DRIL62.156 F2-28	Chile16_102-9	13	56	15	25	40	26.25	62
8682	2	H100_DRIL62.156	H100_DRIL62.156 F2-43	Chile16_104-1	13	57	10	20	40	22.5	64
8683	2	H100_DRIL62.156	H100_DRIL62.156 F2-51	Chile16_104-9	13	58	15	25	45	27.5	62
8684	2	H100_DRIL62.156	H100_DRIL62.156 F2-41	Chile16_103-9	13	59	10	20	40	22.5	63
8685	2	DRIL62.156	DRIL62.156	CL16 1435-1	14	59	10	20	35	21.25	66
8686	2	H100_DRIL62.156	H100_DRIL62.156 F2-13	Chile16_101-3	14	58	10	20	35	21.25	61
8687	2			BBP	14	57				0	#NUM!
8688	2	H100_DRIL32.095	H100_DRIL32.095 F2-19	Chile16_31-5	14	56	20	25	45	28.75	59
8689	2	H100	H100	CL14 2142 bulk	14	55	25	25	50	31.25	59
8690	2	H100_DRIL32.095	H100_DRIL32.095 F2-51	Chile16_34-9	14	54	20	25	40	27.5	59
8691	2	H100_DRIL32.095	H100_DRIL32.095 F2-8	BBP	14	53				0	#NUM!
8692	2	H100_DRIL32.095	H100_DRIL32.095 F2-64	Chile16_30-4	14	52	20	25	45	28.75	59
8693	2	H100_DRIL32.095	H100_DRIL32.095 F2-77	Chile16_29-4	14	51	20	25	40	27.5	61
8694	2	H100_DRIL32.095	H100_DRIL32.095 F2-23	Chile16_31-9	14	50	15	20	40	23.75	63
8695	2	H100_DRIL32.095	H100_DRIL32.095 F2-70	Chile16_30-10	14	49	15	25	45	27.5	70
8696	2	H100_DRIL32.095	H100_DRIL32.095 F2-55	Chile16_34-13	14	48	20	25	45	28.75	57
8697	2	H100_DRIL32.095	H100_DRIL32.095 F2-7	Chile16_33-7	14	47	15	25	45	27.5	61
8698	2	H100_DRIL32.095	H100_DRIL32.095 F2-35	Chile16_32-10	14	46	15	20	40	23.75	71
8699	2	H100_DRIL32.095	H100_DRIL32.095 F2-34	Chile16_32-9	14	45	10	20	40	22.5	63
8700	2	H100_DRIL32.095	H100_DRIL32.095 F2-74	Chile16_29-1	14	44	15	25	45	27.5	60
8701	2	H100_DRIL32.095	H100_DRIL32.095 F2-49	Chile16_34-7	14	43	15	25	45	27.5	65
8702	2	H100_DRIL32.095	H100_DRIL32.095 F2-54	Chile16_34-12	14	42	15	25	45	27.5	62
8703	2	H100_DRIL32.095	H100_DRIL32.095 F2-53	Chile16_34-11	14	41	15	25	40	26.25	62
8704	2	H100_DRIL32.095	H100_DRIL32.095 F2-13	Chile16_33-13	14	40	15	25	40	26.25	63
8705	2	H100	H100	CL14 2142 bulk	14	39	20	30	45	31.25	61
8706	2	H100_DRIL32.095	H100_DRIL32.095 F2-37	Chile16_32-12	14	38	15	25	45	27.5	63
8707	2	H100_DRIL32.095	H100_DRIL32.095 F2-73	Chile16_30-13	14	37	10	20	40	22.5	61
8708	2	H100_DRIL32.095	H100_DRIL32.095 F2-52	Chile16_34-10	14	36	15	25	45	27.5	61
8709	2	H100_DRIL32.095	H100_DRIL32.095 F2-1	Chile16_33-1	14	35	15	25	45	27.5	63
8710	2	H100_DRIL32.095	H100_DRIL32.095 F2-60	Chile16_34-18	14	34	10	25	40	25	63
8711	2	H100_DRIL32.095	H100_DRIL32.095 F2-82	Chile16_29-9	14	33	10	25	40	25	63
8712	2	H100_DRIL32.095	H100_DRIL32.095 F2-20	Chile16_31-6	15	33	10	20	40	22.5	59
8713	2	H100_DRIL32.095	H100_DRIL32.095 F2-5	Chile16_33-5	15	34	10	20	40	22.5	63
8714	2	H100_DRIL32.095	H100_DRIL32.095 F2-79	Chile16_29-6	15	35	15	25	45	27.5	61
8715	2	H100	H100	CL14 2142 bulk	15	36	15	30	50	31.25	60
8716	2	H100_DRIL32.095	H100_DRIL32.095 F2-43	Chile16_34-1	15	37	20	30	45	31.25	61
8717	2	H100_DRIL32.095	H100_DRIL32.095 F2-69	Chile16_30-9	15	38	15	25	40	26.25	63
8718	2	H100_DRIL32.095	H100_DRIL32.095 F2-83	Chile16_29-10	15	39	15	20	40	23.75	65
8719	2	H100_DRIL32.095	H100_DRIL32.095 F2-6	Chile16_33-6	15	40	15	25	45	27.5	60
8720	2	H100_DRIL32.095	H100_DRIL32.095 F2-33	Chile16_32-8	15	41	15	25	45	27.5	61
8721	2	H100_DRIL32.095	H100_DRIL32.095 F2-58	Chile16_34-16	15	42	15	20	40	23.75	65
8722	2	H100	H100	CL14 2142 bulk	15	43	25	30	50	33.75	58
8723	2	H100_DRIL32.095	H100_DRIL32.095 F2-15	Chile16_31-1	15	44	20	25	45	28.75	58
8724	2	H100_DRIL32.095	H100_DRIL32.095 F2-32	Chile16_32-7	15	45	15	20	40	23.75	63
8725	2	H100_DRIL32.095	H100_DRIL32.095 F2-3	Chile16_33-3	15	46	20	25	45	28.75	61
8726	2	H100_DRIL32.095	H100_DRIL32.095 F2-27	Chile16_32-2	15	47	15	20	40	23.75	65
8727	2	H100_DRIL32.095	H100_DRIL32.095 F2-42	Chile16_32-17	15	48	15	25	45	27.5	59
8728	2	H100_DRIL32.095	H100_DRIL32.095 F2-18	Chile16_31-4	15	49	15	25	40	26.25	65
8729	2	H100_DRIL32.095	H100_DRIL32.095 F2-85	Chile16_29-12	15	50	15	25	40	26.25	59
8730	2	H100_DRIL32.095	H100_DRIL32.095 F2-10	Chile16_33-10	15	51	15	25	45	27.5	63
8731	2	H100_DRIL32.095	H100_DRIL32.095 F2-41	Chile16_32-16	15	52	15	25	45	27.5	59
8732	2	H100_DRIL32.095	H100_DRIL32.095 F2-59	Chile16_34-17	15	53	20	30	45	31.25	61
8733	2	H100_DRIL32.095	H100_DRIL32.095 F2-50	Chile16_34-8	15	54	15	25	40	26.25	61
8734	2	H100_DRIL32.095	H100_DRIL32.095 F2-81	Chile16_29-8	15	55	15	25	40	26.25	63
8735	2	H100_DRIL32.095	H100_DRIL32.095 F2-67	Chile16_30-7	15	56	15	25	45	27.5	59
8736	2	H100_DRIL32.095	H100_DRIL32.095 F2-9	Chile16_33-9	15	57	15	25	40	26.25	60
8737	2	H100_DRIL32.095	H100_DRIL32.095 F2-66	Chile16_30-6	15	58	15	25	25	22.5	62
8738	2	H100_DRIL32.095	H100_DRIL32.095 F2-71	Chile16_30-11	15	59	15	25	25	22.5	62
8739	2	H100_DRIL32.095	H100_DRIL32.095 F2-29	Chile16_32-4	16	59	20	30	45	31.25	62
8740	2	H100_DRIL32.095	H100_DRIL32.095 F2-78	Chile16_29-5	16	58	15	25	45	27.5	59
8741	2	H100_DRIL32.095	H100_DRIL32.095 F2-31	Chile16_32-6	16	57	20	25	45	28.75	64
8742	2	H100_DRIL32.095	H100_DRIL32.095 F2-28	Chile16_32-3	16	56	15	25	40	26.25	63
8743	2	DRIL32.095	DRIL32.095	cl16 1393-1	16	55	15	25	40	26.25	65
8744	2	H100	H100	CL14 2142 bulk	16	54	25	35	55	37.5	56
8745	2	H100_DRIL32.095	H100_DRIL32.095 F2-40	Chile16_32-15	16	53	20	30	50	32.5	61
8746	2	H100_DRIL32.095	H100_DRIL32.095 F2-62	Chile16_30-2	16	52	15	30	45	30	61
8747	2	H100_DRIL32.095	H100_DRIL32.095 F2-46	Chile16_34-4	16	51	15	30	45	30	63
8748	2	H100_DRIL32.095	H100_DRIL32.095 F2-16	Chile16_31-2	16	50	20	30	45	31.25	59
8749	2	H100_DRIL32.095	H100_DRIL32.095 F2-44	Chile16_34-2	16	49	15	25	45	27.5	61
8750	2	H100_DRIL32.095	H100_DRIL32.095 F2-86	Chile16_29-13	16	48	15	30	45	30	57
8751	2	H100_DRIL32.095	H100_DRIL32.095 F2-30	Chile16_32-5	16	47	15	25	40	26.25	59
8752	2	H100_DRIL32.095	H100_DRIL32.095 F2-39	Chile16_32-14	16	46	15	25	40	26.25	62
8753	2	H100_DRIL32.095	H100_DRIL32.095 F2-80	Chile16_29-7	16	45	15	30	40	28.75	61
8754	2	H100_DRIL32.095	H100_DRIL32.095 F2-65	Chile16_30-5	16	44	15	25	45	27.5	59
8755	2	H100_DRIL32.095	H100_DRIL32.095 F2-72	Chile16_30-12	16	43	15	25	45	27.5	63
8756	2	H100_DRIL32.095	H100_DRIL32.095 F2-68	Chile16_30-8	16	42	10	25	40	25	64
8757	2	H100_DRIL32.095	H100_DRIL32.095 F2-75	Chile16_29-2	16	41	10	20	40	22.5	63
8758	2	H100_DRIL32.095	H100_DRIL32.095 F2-38	Chile16_32-13	16	40	15	25	45	27.5	61
8759	2	H100_DRIL32.095	H100_DRIL32.095 F2-4	Chile16_33-4	16	39	10	20	40	22.5	59
8760	2	H100_DRIL32.095	H100_DRIL32.095 F2-12	Chile16_33-12	16	38	15	25	40	26.25	61
8761	2	H100_DRIL32.095	H100_DRIL32.095 F2-36	Chile16_32-11	16	37	15	25	40	26.25	61
8762	2	H100_DRIL32.095	H100_DRIL32.095 F2-22	Chile16_31-8	16	36	15	25	40	26.25	63
8763	2	H100_DRIL32.095	H100_DRIL32.095 F2-26	Chile16_32-1	16	35	10	25	40	25	61
8764	2	H100_DRIL32.095	H100_DRIL32.095 F2-61	Chile16_30-1	16	34	10	20	40	22.5	63
8765	2	H100_DRIL32.095	H100_DRIL32.095 F2-17	Chile16_31-3	16	33	10	25	40	25	63
8766	2	H100_DRIL32.095	H100_DRIL32.095 F2-48	Chile16_34-6	17	33	10	20	40	22.5	62
8767	2	H100_DRIL32.095	H100_DRIL32.095 F2-21	Chile16_31-7	17	34	10	25	45	26.25	60
8768	2	H100_DRIL32.095	H100_DRIL32.095 F2-45	Chile16_34-3	17	35	10	25	45	26.25	60
8769	2	H100_DRIL32.095	H100_DRIL32.095 F2-47	Chile16_34-5	17	36	15	25	45	27.5	60
8770	2	H100_DRIL32.095	H100_DRIL32.095 F2-25	Chile16_31-11	17	37	15	25	45	27.5	59
8771	2	H100_DRIL32.095	H100_DRIL32.095 F2-24	Chile16_31-10	17	38	15	25	45	27.5	63
8772	2	H100_DRIL32.095	H100_DRIL32.095 F2-63	Chile16_30-3	17	39	15	25	40	26.25	60
8773	2	H100_DRIL32.095	H100_DRIL32.095 F2-14	Chile16_33-14	17	40	20	30	45	31.25	60
8774	2	H100_DRIL32.095	H100_DRIL32.095 F2-2	Chile16_33-2	17	41	15	25	40	26.25	57
8775	2	H100_DRIL32.095	H100_DRIL32.095 F2-84	Chile16_29-11	17	42	15	25	40	26.25	63
8776	2	H100_DRIL32.095	H100_DRIL32.095 F2-11	Chile16_33-11	17	43	15	30	45	30	60
8777	2	H100_DRIL32.095	H100_DRIL32.095 F2-76	Chile16_29-3	17	44	10	25	40	25	58
8778	2	H100_DRIL32.095	H100_DRIL32.095 F2-57	Chile16_34-15	17	45	20	30	45	31.25	59
8779	2			BBP	17	46				0	#NUM!
8780	2	H100	H100	CL14 2142 bulk	17	47	25	35	55	37.5	57
8781	2	H100_DRIL62.030	H100_DRIL62.030 F2-29	Chile16_77-11	17	48	20	35	50	35	59
8782	2	H100_DRIL62.030	H100_DRIL62.030 F2-20	Chile16_77-2	17	49	20	35	50	35	59
8783	2	H100_DRIL62.030	H100_DRIL62.030 F2-23	Chile16_77-5	17	50	20	30	50	32.5	63
8784	2	H100_DRIL62.030	H100_DRIL62.030 F2-13	Chile16_79-13	17	51	25	35	50	36.25	59
8785	2	H100	H100	CL14 2142 bulk	17	52	20	35	50	35	56
8786	2	H100_DRIL62.030	H100_DRIL62.030 F2-28	BBP	17	53				0	#NUM!
8787	2	H100_DRIL62.030	H100_DRIL62.030 F2-15	Chile16_78-2	17	54	15	30	50	31.25	58
8788	2	H100_DRIL62.030	H100_DRIL62.030 F2-9	Chile16_79-9	17	55	20	30	45	31.25	61
8789	2	H100_DRIL62.030	H100_DRIL62.030 F2-47	Chile16_80-6	17	56	20	30	50	32.5	59
8790	2	H100_DRIL62.030	H100_DRIL62.030 F2-7	Chile16_79-7	17	57	np	np	np	#VALUE!	64
8791	2	H100	H100	CL14 2142 bulk	17	58	20	35	50	35	59
8792	2	H100_DRIL62.030	H100_DRIL62.030 F2-24	Chile16_77-6	17	59	15	25	45	27.5	60
8793	2	H100_DRIL62.030	H100_DRIL62.030 F2-45	Chile16_80-4	18	59	15	20	40	23.75	63
8794	2	H100_DRIL62.030	H100_DRIL62.030 F2-42	Chile16_80-1	18	58	20	30	45	31.25	61
8795	2	H100_DRIL62.030	H100_DRIL62.030 F2-11	Chile16_79-11	18	57	20	25	45	28.75	61
8796	2	H100_DRIL62.030	H100_DRIL62.030 F2-26	Chile16_77-8	18	56	15	25	45	27.5	61
8797	2	H100_DRIL62.030	H100_DRIL62.030 F2-43	Chile16_80-2	18	55	15	30	45	30	59
8798	2	H100_DRIL62.030	H100_DRIL62.030 F2-1	BBP	18	54				0	#NUM!
8799	2	H100_DRIL62.030	H100_DRIL62.030 F2-4	Chile16_79-4	18	53	15	25	45	27.5	63
8800	2	H100_DRIL62.030	H100_DRIL62.030 F2-8	Chile16_79-8	18	52	20	30	50	32.5	58
8801	2	H100_DRIL62.030	H100_DRIL62.030 F2-27	Chile16_77-9	18	51	20	30	50	32.5	64
8802	2	H100_DRIL62.030	H100_DRIL62.030 F2-48	Chile16_80-7	18	50	25	30	50	33.75	58
8803	2	H100	H100	CL14 2142 bulk	18	49	25	30	50	33.75	59
8804	2	H100_DRIL62.030	H100_DRIL62.030 F2-5	Chile16_79-5	18	48	20	30	50	32.5	58
8805	2	H100_DRIL62.030	H100_DRIL62.030 F2-12	Chile16_79-12	18	47	20	30	50	32.5	60
8806	2	H100_DRIL62.030	H100_DRIL62.030 F2-19	Chile16_77-1	18	46	20	30	45	31.25	59
8807	2	H100_DRIL62.030	H100_DRIL62.030 F2-18	Chile16_78-5	18	45	15	25	45	27.5	59
8808	2	H100_DRIL62.030	H100_DRIL62.030 F2-49	Chile16_80-8	18	44	15	25	50	28.75	60
8809	2	H100_DRIL62.030	H100_DRIL62.030 F2-10	Chile16_79-10	18	43	25	30	50	33.75	58
8810	2	H100_DRIL62.030	H100_DRIL62.030 F2-22	Chile16_77-4	18	42	25	30	50	33.75	58
8811	2	H100_DRIL62.030	H100_DRIL62.030 F2-21	Chile16_77-3	18	41	20	30	50	32.5	60
8812	2	H100_DRIL62.030	H100_DRIL62.030 F2-3	Chile16_79-3	18	40	20	30	50	32.5	60
8813	2	H100_DRIL62.030	H100_DRIL62.030 F2-6	BBP	18	39				0	#NUM!
8814	2	H100_DRIL62.030	H100_DRIL62.030 F2-25	Chile16_77-7	18	38	20	30	35	28.75	60
8815	2	H100_DRIL62.030	H100_DRIL62.030 F2-46	Chile16_80-5	18	37	20	30	45	31.25	60
8816	2	DRIL62.030	DRIL62.030	CL16 1429-1	18	36	15	25	45	27.5	65
8817	2	H100_DRIL62.030	H100_DRIL62.030 F2-14	BBP	18	35				0	#NUM!
8818	2			BBP	18	34				0	#NUM!
8819	2	H100_DRIL32.134	H100_DRIL32.134 F2-14	Chile16_35-14	18	33	15	25	40	26.25	60
8820	2	H100_DRIL32.134	H100_DRIL32.134 F2-36	Chile16_40-7	19	33	10	20	40	22.5	60
8821	2	H100_DRIL32.134	H100_DRIL32.134 F2-48	Chile16_37-1	19	34	10	20	45	23.75	59
8822	2	H100_DRIL32.134	H100_DRIL32.134 F2-11	BBP	19	35				0	#NUM!
8823	2	H100_DRIL32.134	H100_DRIL32.134 F2-49	Chile16_37-2	19	36	10	20	40	22.5	60
8824	2	H100	H100	CL14 2142 bulk	19	37	25	35	50	36.25	58
8825	2	H100_DRIL32.134	H100_DRIL32.134 F2-7	Chile16_35-7	19	38	10	20	40	22.5	61
8826	2	H100_DRIL32.134	H100_DRIL32.134 F2-16	Chile16_36-1	19	39	15	25	45	27.5	59
8827	2	H100_DRIL32.134	H100_DRIL32.134 F2-27	Chile16_39-6	19	40	20	30	45	31.25	61
8828	2	H100_DRIL32.134	H100_DRIL32.134 F2-1	Chile16_35-1	19	41	20	25	45	28.75	56
8829	2	H100_DRIL32.134	H100_DRIL32.134 F2-38	Chile16_38-1	19	42	15	25	45	27.5	61
8830	2	H100_DRIL32.134	H100_DRIL32.134 F2-4	Chile16_35-4	19	43	10	25	40	25	58
8831	2	H100_DRIL32.134	H100_DRIL32.134 F2-15	Chile16_35-15	19	44	10	20	40	22.5	61
8832	2	H100_DRIL32.134	H100_DRIL32.134 F2-17	Chile16_36-2	19	45	15	25	45	27.5	59
8833	2	H100_DRIL32.134	H100_DRIL32.134 F2-54	Chile16_37-7	19	46	15	10	45	20	58
8834	2	H100_DRIL32.134	H100_DRIL32.134 F2-5	Chile16_35-5	19	47	15	25	45	27.5	57
8835	2	H100	H100	CL14 2142 bulk	19	48	25	35	55	37.5	58
8836	2	H100_DRIL32.134	H100_DRIL32.134 F2-31	Chile16_40-2	19	49	10	20	45	23.75	60
8837	2	H100_DRIL32.134	H100_DRIL32.134 F2-40	Chile16_38-3	19	50	10	20	45	23.75	58
8838	2	H100_DRIL32.134	H100_DRIL32.134 F2-59	Chile16_37-12	19	51	10	20	40	22.5	58
8839	2	H100_DRIL32.134	H100_DRIL32.134 F2-55	Chile16_37-8	19	52	10	20	40	22.5	58
8840	2	H100_DRIL32.134	H100_DRIL32.134 F2-50	Chile16_37-3	19	53	10	20	45	23.75	62
8841	2	H100_DRIL32.134	H100_DRIL32.134 F2-52	Chile16_37-5	19	54	10	20	40	22.5	58
8842	2	H100	H100	CL14 2423-1	19	55	10	25	45	26.25	58
8843	2	H100_DRIL32.134	H100_DRIL32.134 F2-24	Chile16_39-3	19	56	10	20	40	22.5	59
8844	2	H100_DRIL32.134	H100_DRIL32.134 F2-32	Chile16_40-3	19	57	10	20	40	22.5	62
8845	2	H100_DRIL32.134	H100_DRIL32.134 F2-13	Chile16_35-13	19	58	15	25	45	27.5	58
8846	2	H100_DRIL32.134	H100_DRIL32.134 F2-26	Chile16_39-5	19	59	10	20	45	23.75	59
8847	2	H100_DRIL32.134	H100_DRIL32.134 F2-61	Chile16_37-14	20	59	10	20	35	21.25	60
8848	2	H100_DRIL32.134	H100_DRIL32.134 F2-33	Chile16_40-4	20	58	15	20	40	23.75	60
8849	2	H100_DRIL32.134	H100_DRIL32.134 F2-9	Chile16_35-9	20	57	10	20	40	22.5	60
8850	2	H100_DRIL32.134	H100_DRIL32.134 F2-35	Chile16_40-6	20	56	15	25	45	27.5	58
8851	2	H100_DRIL32.134	H100_DRIL32.134 F2-42	Chile16_38-5	20	55	15	25	45	27.5	59
8852	2	H100_DRIL32.134	H100_DRIL32.134 F2-41	Chile16_38-4	20	54	10	20	40	22.5	58
8853	2	H100_DRIL32.134	H100_DRIL32.134 F2-45	Chile16_38-8	20	53	10	20	40	22.5	61
8854	2	H100_DRIL32.134	H100_DRIL32.134 F2-46	Chile16_38-9	20	52	10	25	40	25	58
8855	2	H100_DRIL32.134	H100_DRIL32.134 F2-60	Chile16_37-13	20	51	10	20	35	21.25	59
8856	2	H100_DRIL32.134	H100_DRIL32.134 F2-29	Chile16_39-8	20	50	10	20	40	22.5	57
8857	2	H100_DRIL32.134	H100_DRIL32.134 F2-3	Chile16_35-3	20	49	10	20	40	22.5	59
8858	2	H100_DRIL32.134	H100_DRIL32.134 F2-56	Chile16_37-9	20	48	15	25	50	28.75	59
8859	2	H100_DRIL32.134	H100_DRIL32.134 F2-37	Chile16_40-8	20	47	15	20	40	23.75	59
8860	2	H100_DRIL32.134	H100_DRIL32.134 F2-34	Chile16_40-5	20	46	15	25	45	27.5	61
8861	2	H100_DRIL32.134	H100_DRIL32.134 F2-58	Chile16_37-11	20	45	15	20	45	25	58
8862	2	H100	H100	CL14 2423-1	20	44	15	25	45	27.5	57
8863	2	H100_DRIL32.134	H100_DRIL32.134 F2-44	Chile16_38-7	20	43	10	20	40	22.5	61
8864	2	H100_DRIL32.134	H100_DRIL32.134 F2-6	Chile16_35-6	20	42	10	25	45	26.25	57
8865	2	H100_DRIL32.134	H100_DRIL32.134 F2-2	Chile16_35-2	20	41	10	25	45	26.25	59
8866	2	H100_DRIL32.134	H100_DRIL32.134 F2-18	Chile16_36-3	20	40	10	20	40	22.5	61
8867	2	H100_DRIL32.134	H100_DRIL32.134 F2-62	Chile16_37-15	20	39	10	25	45	26.25	54
8868	2	DRIL32.134	DRIL32.134	CL16 1394-1	20	38	10	15	25	16.25	60
8869	2	H100_DRIL32.134	H100_DRIL32.134 F2-23	Chile16_39-2	20	37	10	25	45	26.25	59
8870	2	H100_DRIL32.134	H100_DRIL32.134 F2-28	Chile16_39-7	20	36	15	25	40	26.25	59
8871	2	H100_DRIL32.134	H100_DRIL32.134 F2-63	Chile16_37-16	20	35	10	20	35	21.25	58
8872	2	H100_DRIL32.134	H100_DRIL32.134 F2-25	Chile16_39-4	20	34	10	20	40	22.5	62
8873	2	H100_DRIL32.134	H100_DRIL32.134 F2-22	Chile16_39-1	20	33	10	20	30	20	61
8874	2	H100_DRIL32.134	H100_DRIL32.134 F2-39	Chile16_38-2	21	33	10	20	35	21.25	58
8875	2	H100_DRIL32.134	H100_DRIL32.134 F2-51	Chile16_37-4	21	34	10	20	35	21.25	60
8876	2	H100_DRIL32.134	H100_DRIL32.134 F2-12	Chile16_35-12	21	35	10	25	40	25	58
8877	2	H100_DRIL32.134	H100_DRIL32.134 F2-19	Chile16_36-4	21	36	15	20	40	23.75	61
8878	2	H100_DRIL32.134	H100_DRIL32.134 F2-53	Chile16_37-6	21	37	15	25	45	27.5	58
8879	2	H100_DRIL32.134	H100_DRIL32.134 F2-30	Chile16_40-1	21	38	10	20	40	22.5	58
8880	2	H100_DRIL32.134	H100_DRIL32.134 F2-21	Chile16_36-6	21	39	15	25	45	27.5	59
8881	2	H100_DRIL32.134	H100_DRIL32.134 F2-47	Chile16_38-10	21	40	15	30	50	31.25	59
8882	2	H100_DRIL32.134	H100_DRIL32.134 F2-10	BBP	21	41				0	#NUM!
8883	2	H100_DRIL32.134	H100_DRIL32.134 F2-43	Chile16_38-6	21	42	10	20	40	22.5	59
8884	2	H100_DRIL32.134	H100_DRIL32.134 F2-8	Chile16_35-8	21	43	15	25	45	27.5	55
8885	2			BBP	21	44				0	#NUM!
8886	2	H100_DRIL32.191	H100_DRIL32.191 F2-29	Chile16_49-2	21	45	15	20	45	25	59
8887	2	H100	H100	CL14 2423-1	21	46	15	25	45	27.5	58
8888	2	H100_DRIL32.191	H100_DRIL32.191 F2-24	Chile16_51-12	21	47	15	25	45	27.5	60
8889	2	H100_DRIL32.191	H100_DRIL32.191 F2-22	Chile16_51-10	21	48	15	25	45	27.5	59
8890	2	H100_DRIL32.191	H100_DRIL32.191 F2-21	Chile16_51-9	21	49	15	20	45	25	63
8891	2	H100_DRIL32.191	H100_DRIL32.191 F2-13	Chile16_51-1	21	50	20	25	45	28.75	60
8892	2	H100_DRIL32.191	H100_DRIL32.191 F2-66	Chile16_47-9	21	51	20	25	50	30	61
8893	2	H100_DRIL32.191	H100_DRIL32.191 F2-3	Chile16_48-3	21	52	15	30	50	31.25	58
8894	2	H100_DRIL32.191	H100_DRIL32.191 F2-20	Chile16_51-8	21	53	15	25	50	28.75	57
8895	2	H100_DRIL32.191	H100_DRIL32.191 F2-10	Chile16_48-10	21	54	15	25	45	27.5	57
8896	2	H100	H100	CL14 2423-1	21	55	20	25	45	28.75	60
8897	2	H100_DRIL32.191	H100_DRIL32.191 F2-25	Chile16_51-13	21	56	20	25	45	28.75	60
8898	2	H100_DRIL32.191	H100_DRIL32.191 F2-65	Chile16_47-8	21	57	15	25	40	26.25	61
8899	2	H100_DRIL32.191	H100_DRIL32.191 F2-83	Chile16_52-9	21	58	15	25	45	27.5	62
8900	2	H100_DRIL32.191	H100_DRIL32.191 F2-73	Chile16_47-16	21	59	15	25	45	27.5	61
8901	2	H100_DRIL32.191	H100_DRIL32.191 F2-70	Chile16_47-13	22	59	20	25	50	30	61
8902	2	H100_DRIL32.191	H100_DRIL32.191 F2-32	Chile16_49-5	22	58	15	25	45	27.5	59
8903	2	H100_DRIL32.191	H100_DRIL32.191 F2-77	Chile16_52-3	22	57	15	25	45	27.5	59
8904	2	H100_DRIL32.191	H100_DRIL32.191 F2-5	Chile16_48-5	22	56	15	25	45	27.5	59
8905	2	H100_DRIL32.191	H100_DRIL32.191 F2-14	Chile16_51-2	22	55	15	25	45	27.5	60
8906	2	H100_DRIL32.191	H100_DRIL32.191 F2-78	Chile16_52-4	22	54	15	25	45	27.5	59
8907	2	H100_DRIL32.191	H100_DRIL32.191 F2-17	Chile16_51-5	22	53	20	25	45	28.75	60
8908	2	H100_DRIL32.191	H100_DRIL32.191 F2-61	Chile16_47-4	22	52	20	30	45	31.25	59
8909	2	H100_DRIL32.191	H100_DRIL32.191 F2-63	Chile16_47-6	22	51	20	30	45	31.25	60
8910	2	H100_DRIL32.191	H100_DRIL32.191 F2-9	Chile16_48-9	22	50	15	25	45	27.5	59
8911	2	H100_DRIL32.191	H100_DRIL32.191 F2-62	Chile16_47-5	22	49	15	25	45	27.5	61
8912	2	H100_DRIL32.191	H100_DRIL32.191 F2-52	Chile16_50-8	22	48	20	25	50	30	59
8913	2	H100_DRIL32.191	H100_DRIL32.191 F2-71	Chile16_47-14	22	47	15	25	45	27.5	57
8914	2	H100_DRIL32.191	H100_DRIL32.191 F2-74	Chile16_47-17	22	46	15	25	45	27.5	58
8915	2	H100_DRIL32.191	H100_DRIL32.191 F2-67	Chile16_47-10	22	45	15	25	45	27.5	59
8916	2	H100_DRIL32.191	H100_DRIL32.191 F2-47	Chile16_50-3	22	44	15	25	45	27.5	57
8917	2	H100	H100	CL14 2423-1	22	43	15	25	50	28.75	56
8918	2	H100_DRIL32.191	H100_DRIL32.191 F2-75	Chile16_52-1	22	42	15	25	45	27.5	58
8919	2	H100_DRIL32.191	H100_DRIL32.191 F2-30	Chile16_49-3	22	41	20	30	50	32.5	59
8920	2	H100_DRIL32.191	H100_DRIL32.191 F2-33	Chile16_49-6	22	40	20	30	50	32.5	58
8921	2	H100_DRIL32.191	H100_DRIL32.191 F2-72	Chile16_47-15	22	39	20	25	50	30	56
8922	2	H100_DRIL32.191	H100_DRIL32.191 F2-19	Chile16_51-7	22	38	20	25	50	30	60
8923	2	H100_DRIL32.191	H100_DRIL32.191 F2-15	Chile16_51-3	22	37	15	25	35	25	57
8924	2	H100_DRIL32.191	H100_DRIL32.191 F2-60	Chile16_47-3	22	36	15	25	45	27.5	60
8925	2	H100_DRIL32.191	H100_DRIL32.191 F2-84	Chile16_52-10	22	35	20	30	50	32.5	60
8926	2	H100_DRIL32.191	H100_DRIL32.191 F2-12	Chile16_48-12	22	34	15	25	45	27.5	61
8927	2	H100_DRIL32.191	H100_DRIL32.191 F2-40	Chile16_49-13	22	33	20	30	50	32.5	58
8928	2	H100_DRIL32.191	H100_DRIL32.191 F2-31	Chile16_49-4	23	33	15	30	50	31.25	58
8929	2	H100_DRIL32.191	H100_DRIL32.191 F2-58	Chile16_47-1	23	34	15	25	45	27.5	65
8930	2	H100_DRIL32.191	H100_DRIL32.191 F2-4	Chile16_48-4	23	35	20	30	50	32.5	58
8931	2	H100_DRIL32.191	H100_DRIL32.191 F2-48	Chile16_50-4	23	36	15	25	50	28.75	58
8932	2	H100_DRIL32.191	H100_DRIL32.191 F2-27	Chile16_51-15	23	37	15	25	45	27.5	58
8933	2	H100_DRIL32.191	H100_DRIL32.191 F2-44	Chile16_49-17	23	38	15	25	45	27.5	60
8934	2	H100_DRIL32.191	H100_DRIL32.191 F2-23	Chile16_51-11	23	39	15	25	50	28.75	59
8935	2	H100_DRIL32.191	H100_DRIL32.191 F2-85	Chile16_52-11	23	40	15	25	50	28.75	60
8936	2	H100_DRIL32.191	H100_DRIL32.191 F2-76	Chile16_52-2	23	41	15	25	50	28.75	58
8937	2	H100_DRIL32.191	H100_DRIL32.191 F2-59	Chile16_47-2	23	42	15	25	50	28.75	59
8938	2	H100_DRIL32.191	H100_DRIL32.191 F2-82	Chile16_52-8	23	43	15	30	50	31.25	57
8939	2	H100_DRIL32.191	H100_DRIL32.191 F2-53	Chile16_50-9	23	44	15	25	50	28.75	59
8940	2	H100_DRIL32.191	H100_DRIL32.191 F2-68	Chile16_47-11	23	45	15	25	45	27.5	61
8941	2	H100_DRIL32.191	H100_DRIL32.191 F2-1	Chile16_48-1	23	46	15	25	45	27.5	58
8942	2	H100_DRIL32.191	H100_DRIL32.191 F2-55	Chile16_50-11	23	47	20	25	45	28.75	59
8943	2	DRIL32.191	DRIL32.191	CL16 1396-1	23	48	15	20	45	25	58
8944	2	H100_DRIL32.191	H100_DRIL32.191 F2-39	Chile16_49-12	23	49	15	20	40	23.75	61
8945	2	H100_DRIL32.191	H100_DRIL32.191 F2-11	Chile16_48-11	23	50	15	25	45	27.5	60
8946	2	H100_DRIL32.191	H100_DRIL32.191 F2-45	Chile16_50-1	23	51	15	25	45	27.5	61
8947	2	H100_DRIL32.191	H100_DRIL32.191 F2-46	Chile16_50-2	23	52	20	30	50	32.5	57
8948	2	H100_DRIL32.191	H100_DRIL32.191 F2-26	Chile16_51-14	23	53	15	25	45	27.5	60
8949	2	H100_DRIL32.191	H100_DRIL32.191 F2-18	Chile16_51-6	23	54	15	25	45	27.5	59
8950	2	H100_DRIL32.191	H100_DRIL32.191 F2-79	Chile16_52-5	23	55	20	25	45	28.75	60
8951	2	H100	H100	CL14 2423-1	23	56	15	30	50	31.25	57
8952	2	H100_DRIL32.191	H100_DRIL32.191 F2-37	Chile16_49-10	23	57	15	25	50	28.75	59
8953	2	H100_DRIL32.191	H100_DRIL32.191 F2-51	Chile16_50-7	23	58	20	25	50	30	61
8954	2	H100_DRIL32.191	H100_DRIL32.191 F2-57	Chile16_50-13	23	59	15	20	40	23.75	61
8955	2	H100_DRIL32.191	H100_DRIL32.191 F2-7	Chile16_48-7	24	59	15	25	45	27.5	60
8956	2	H100_DRIL32.191	H100_DRIL32.191 F2-81	Chile16_52-7	24	58	20	25	45	28.75	58
8957	2	H100_DRIL32.191	H100_DRIL32.191 F2-64	Chile16_47-7	24	57	20	25	45	28.75	60
8958	2	H100_DRIL32.191	H100_DRIL32.191 F2-43	Chile16_49-16	24	56	15	25	45	27.5	61
8959	2	H100_DRIL32.191	H100_DRIL32.191 F2-80	Chile16_52-6	24	55	20	30	45	31.25	61
8960	2	H100_DRIL32.191	H100_DRIL32.191 F2-54	Chile16_50-10	24	54	20	30	50	32.5	58
8961	2	H100_DRIL32.191	H100_DRIL32.191 F2-2	Chile16_48-2	24	53	15	30	45	30	62
8962	2	H100_DRIL32.191	H100_DRIL32.191 F2-41	Chile16_49-14	24	52	20	30	45	31.25	59
8963	2	H100_DRIL32.191	H100_DRIL32.191 F2-8	Chile16_48-8	24	51	15	25	45	27.5	59
8964	2	H100_DRIL32.191	H100_DRIL32.191 F2-69	Chile16_47-12	24	50	15	25	45	27.5	61
8965	2	H100_DRIL32.191	H100_DRIL32.191 F2-16	Chile16_51-4	24	49	15	25	45	27.5	61
8966	2	H100_DRIL32.191	H100_DRIL32.191 F2-49	Chile16_50-5	24	48	15	25	45	27.5	59
8967	2	H100	H100	CL14 2423-1	24	47	15	25	45	27.5	58
8968	2	H100_DRIL32.191	H100_DRIL32.191 F2-28	Chile16_49-1	24	46	15	25	45	27.5	61
8969	2	H100_DRIL32.191	H100_DRIL32.191 F2-86	Chile16_52-12	24	45	20	25	50	30	58
8970	2	H100_DRIL32.191	H100_DRIL32.191 F2-6	Chile16_48-6	24	44	20	25	50	30	59
8971	2	H100_DRIL32.191	H100_DRIL32.191 F2-42	Chile16_49-15	24	43	15	25	45	27.5	58
8972	2	H100	H100	CL14 2423-1	24	42	20	25	45	28.75	58
8973	2	H100_DRIL32.191	H100_DRIL32.191 F2-50	Chile16_50-6	24	41	20	30	50	32.5	57
8974	2	H100_DRIL32.191	H100_DRIL32.191 F2-38	Chile16_49-11	24	40	20	30	50	32.5	58
